# Supplementary material for: Molecular mechanisms underlying floral fragrance in Camellia japonica ‘High Fragrance’: a time-course assessment
Source: Front Plant Sci. 2024 Nov 12;15:1461442. doi: 10.3389/fpls.2024.1461442 (PMC11588446; doi:10.3389/fpls.2024.1461442)
Supplement: Supplementary file 6 [file Table1.xlsx]

## Sheet: Stable1
	Supplementary Table 1. Primers used for qRT-PCR validation assay
	Gene	Primes sequences
	GAPDH	Forward: 5’- GACTCAACACGGGGAAACTTACC -3’
		Reverse: 5’- CAGACAAATCGCTCCACCAAC-3’
	PAL	Forward: 5’- CTACTCTGGCATTCGGTTCG -3’
		Reverse: 5’- CATTGAGCGTTTCTCCGTTG -3’
	4CL	Forward: 5’- TCCCAATGGCTTTTGTAGTCA -3’
		Reverse: 5’- TTTCCAGCCGCTGACTTCG -3’
	COMT	Forward: 5’- TGGGAAAGAAAGGACACAGAAG -3’
		Reverse: 5’- CACACTCAAAAACCAGAAAGCA -3’
	LOX	Forward: 5’- GCGAGCAACAGGCAACTTAG -3’
		Reverse: 5’- CATTGTGTACCGAAAATGAGGG -3’
	C4H	Forward: 5’- TCGTCCTTGCCATCACTATCTC -3’
		Reverse: 5’- GCGGTGGTTCAAGTCATCTCC -3’
	HCT	Forward: 5’- TGATTTTGAAGGAGGGGGAC -3’
		Reverse: 5’- AGGTGGAAGATTGGAGGGTG -3’
	SAMT	Forward: 5’- TCCCCTGCTGAGGTAAAATCT -3’
		Reverse: 5’- AGCAATGACTCAGCCACAGC -3’
	HMGR	Forward: 5’- GGGCGTGGAAAGTCAGTAGTT -3’
		Reverse: 5’- CCACATTCTGAGCAGGGTCTTG -3’
	DXS	Forward: 5’- GCCTTAGCACCTCACAGCCT -3’
		Reverse: 5’-CAGGTGTGGAGATATACACGGG -3’
	BAS	Forward: 5’- GTGCTCTGCCCTGTGCTGAT -3’
		Reverse: 5’- TGGGGTAAAAAACATTGGTCC -3’
	GERD	Forward: 5’- TGACAAGGCTAGAGGCAACCC -3’
		Reverse: 5’- TTGTGATTTCGCTTAGCTCCC -3’
	NES	Forward: 5’- AACTGGATATCGCAGCTTAACC -3’
		Reverse: 5’- CACATTGTACCCTTCTTGCCTT -3’

## Sheet: Stable2
Supplementary Table2. VOCs detected in floral organs of C.japonica ‘High Fragrance’ and accociated odors
Number	Index	Compounds	Category	Odor	CAS	NIST_RI	Bd (relative intensity)	Ib (relative intensity)	Fb (relative intensity)
1	XMW0495	Dehydromevalonic lactone	Ester	-	2381-87-5	1169	3.59469e+06	4.40866e+06	4.99161e+06
2	KMW0429	Isobornyl formate	Ester	camphor, musty, medicinal, woody	1200-67-5	1233	1.31882e+07	1.69787e+07	1.88932e+07
3	NMW0766	2-Propenoic acid, butyl ester	Ester	-	141-32-2	861	7.15425e+06	5.24623e+06	4.53667e+06
4	KMW0411	1,6-Octadien-3-ol, 3,7-dimethyl-, formate	Ester	citrus, herbal, bergamot, lavender, soapy, fatty, green, woody	115-99-1	1215	1.16717e+07	7.64484e+06	4.66428e+06
5	KMW0232	Octanoic acid, methyl ester	Ester	fruity, citrus	111-11-5	1126	1.07561e+07	1.44976e+07	1.65713e+07
6	XMW0073	3-Methylheptyl acetate	Ester	-	72218-58-7	1118	2.17976e+06	1.98811e+06	1.95737e+06
7	w43	2-Oxepanone	Ester	-	502-44-3	1065	503657	545520	586592
8	NMW0142	Cyclohexanol, 1-methyl-4-(1-methylethylidene)-, acetate	Ester	-	10235-63-9	1341	0	0	418144
9	XMW1227	(E)-2-Methylbut-2-en-1-yl methacrylate	Ester	-	88142-95-4	1088	244561	280030	303354
10	XMW0904	Phosphoric acid, dibutyl 1-methylethenyl ester	Ester	-	5954-40-5	1474	100892	202310	249817
11	XMW1243	Methyl 6-chloronicotinate	Ester	-	73781-91-6	1234	150870	196757	224820
12	XMW0881	2-Butenoic acid, 3-methyl-, methyl ester	Ester	-	924-50-5	842	227784	162271	169898
13	XMW0933	Bicyclo[3.1.1]hept-2-en-6-ol, 2,7,7-trimethyl-, acetate, [1S-(1.alpha.,5.alpha.,6.beta.)]-	Ester	-	50764-55-1	1239	164725	164110	165551
14	XMW1401	n-Valeric acid cis-3-hexenyl ester	Ester	green, fruity, apple, pear, kiwi, unripe, banana, tropical	35852-46-1	1237	3.63789e+06	4.75954e+06	5.28767e+06
15	KMW0061	Isobutyl acetate	Ester	sweet, fruity, ethereal, banana, tropical	110-19-0	772	3.15637e+06	3.28989e+06	3.36046e+06
16	D85	Butanoic acid, 3-methyl-, hexyl ester	Ester	sweet, green fruit, apple, unripe apple skin, strawberry	10032-13-0	1244	2.52511e+06	3.25976e+06	3.58506e+06
17	D357	2-Propanol, 1-(dimethylamino)-, acetate (ester)	Ester	-	32188-28-6	869	217506	156616	129978
18	XMW1258	Acetic acid, (4,6,8,9-tetramethyl-3-oxabicyclo[3.3.1]non-6-en-1-yl)methyl ester	Ester	-	309722-81-4	1667	32590.8	59659.9	77096.6
19	D240	Propanoic acid, 2,2-dimethyl-, pentyl ester	Ester	-	2313-68-0	1063	78550.3	60059.5	45583.4
20	XMW1117	2-Propenoic acid, pentyl ester	Ester	-	2998-23-4	974	45424.4	39076.7	40910.9
21	XMW1067	Butanoic acid, 2-pentenyl ester, (Z)-	Ester	-	42125-13-3	1091	26622.2	35381.5	34856.3
22	XMW0951	2-Cyclohexen-1-ol, 2-methyl-5-(1-methylethenyl)-, acetate, (1R-cis)-	Ester	-	7111-29-7	1346	1270.47	0	33693.5
23	XMW1305	Ethyl 5-methylhexanoate	Ester	-	10236-10-9	1068	27211.4	28750.3	30167
24	D457	1-Hexanol, 5-methyl-2-(1-methylethyl)-, acetate	Ester	-	40853-55-2	1265	16160.1	19158.6	16088.9
25	XMW1192	2-Propenoic acid, 2-methyl-, 2-chloroethyl ester	Ester	-	1888-94-4	977	2754.5	20296.8	9549.73
26	XMW0472	1,2-Ethanediol, monobenzoate	Ester	-	94-33-7	1402	23110	30691.6	8002.44
27	XMW0213	Isopentyl hexanoate	Ester	fruity, banana, apple, pineapple, green	2198-61-0	1250	1.41392e+06	1.82469e+06	2.01376e+06
28	D333	(+)-cis-Verbenol, acetate	Ester	-	29135-27-1	1279	0	1404.75	854.853
29	XMW1240	Hexanoic acid, 2-methylbutyl ester	Ester	ethereal	2601-13-0	1247	705689	899504	986149
30	D417	3-Hexen-1-ol, acetate, (E)-	Ester	sharp, fruity, green, cortex, hyacinth, narcissus, rummy, unripe banana, pear	3681-82-1	1005	600055	109912	33377.9
31	KMW0585	Citronellyl isobutyrate	Ester	sweet, fruity, floral, geranium, tropical	97-89-2	1483	552073	1.18536e+06	1.36504e+06
32	D246	Propanoic acid, 2-methyl-, 3,7-dimethyl-2,6-octadienyl ester, (Z)-	Ester	sweet, fresh, fruity, raspberry, strawberry, green	2345-24-6	1475	380118	747136	919616
33	KMW0283	Hexanoic acid, propyl ester	Ester	sweet, fruity, juicy, pineapple, green, tropical	626-77-7	1097	356656	267866	191328
34	D158	2-Phenoxyethyl isobutyrate	Ester	green, fruity, waxy, apple, nuances	103-60-6	1488	252966	492435	599758
35	KMW0421	Methyl salicylate	Ester	caramel, pepperminty	119-36-8	1192	184512	347538	5.75114e+06
36	KMW0340	2-Octanol, acetate	Ester	fruity	2051-50-5	1115	173849	143190	145739
37	NMW0025	Acetic acid, phenyl ester	Ester	phenol, medicinal, animalic, resinous, castoreum, woody, smoky, burnt	122-79-2	1067	128380	140726	147183
38	KMW0366	Butanoic acid, 3-hexenyl ester, (Z)-	Ester	fresh, green, apple, fruity, wine, metallic, buttery	16491-36-4	1187	120706	137881	155444
39	NMW0016	Acetic acid, cyclohexyl ester	Ester	fruity, sweet, musty, ethereal	622-45-7	1043	69062	86561.4	96180.1
40	KMW0679	2-Propenoic acid, 3-phenyl-, methyl ester, (E)-	Ester	sweet, balsamic, strawberry, cherry	1754-62-7	1379	30395.4	0	23543.5
41	XMW0296	Acetic acid, octyl ester	Ester	green, earthy, mushroom, herbal, waxy	112-14-1	1210	29581.6	26055.7	30605.7
42	XMW0299	Butanoic acid, butyl ester	Ester	fruity, banana, pineapple, green, cherry, tropical fruit, ripe fruit, juicy fruity	109-21-7	995	23121	28264.1	24899.7
43	w29	4-Pentenyl Acetate	Ester	green, plastic, weedy, acrylate, vegetable, metallic, cooked meat, sulfury	1576-85-8	896	20130.9	14973.2	18321.5
44	KMW0267	Benzoic acid, methyl ester	Ester	phenol, wintergreen, almond, floral, canga	93-58-3	1094	17374.5	11512.4	1.58678e+06
45	XMW1244	Hexanoic acid, pentyl ester	Ester	sweet, green, fruity, estery, pineapple, apple, pear, fatty	540-07-8	1287	14836	18676.9	20025.2
46	KMW0204	Acetic acid, hexyl ester	Ester	fruity, green, apple, banana, sweet	142-92-7	1014	13756.5	7976.85	0
47	XMW1310	Isobutyl isovalerate	Ester	sweet, fruity, apple, raspberry, green, banana	589-59-3	1005	11717.2	9596.11	9762.65
48	D222	Hexanoic acid, 3-methyl-2-butenyl ester	Ester	fruity, green, cheese	76649-22-4	1284	7799.75	10471.1	12215.6
49	KMW0437	Acetic acid, 2-phenylethyl ester	Ester	floral, rose, sweet, honey, fruity, tropical	103-45-7	1260	6523.75	5156.88	150189
50	D358	4-tert-Butylcyclohexyl acetate	Ester	woody, cedary, floral, oily, herbal, balsamic, green, fruity	32210-23-4	1368	3244.68	6592.5	6508.27
51	KMW0534	Butyl caprylate	Ester	buttery, ether, herbal, dank	589-75-3	1389	3145.57	5038.11	4807.24
52	D112	Benzeneacetic acid, methyl ester	Ester	floral, honey, spice, waxy, sweet	101-41-7	1178	0	0	12997.3
53	KMW0516	.alpha.-Terpinyl acetate	Ester	herbal, bergamot, lavender, lime, citrus	80-26-2	1350	0	0	463299
54	KMW0380	Pyrazine, 2-methoxy-3-(2-methylpropyl)-	Heterocyclic compound	green bell pepper, pea, galbanum	24683-00-9	1181	8.36729e+07	9.44712e+07	9.94458e+07
55	D191	2-Hexanoylfuran	Heterocyclic compound	sweet, fruity, ketonic, green, apricot, peach	14360-50-0	1239	1.77001e+07	2.27986e+07	2.46213e+07
56	KMW0383	2(5H)-Furanone, 5-ethyl-3-hydroxy-4-methyl-	Heterocyclic compound	sweet, fruity, caramel, maple, fenugreek, brown, sugar, nutty, chicory, praline, butterscotch	698-10-2	1195	7.57512e+06	8.63362e+06	9.16154e+06
57	XMW0358	1-Pentanone, 1-(2-furanyl)-	Heterocyclic compound	sweet, caramel	3194-17-0	1176	1.52595e+06	1.82557e+06	2.0555e+06
58	KMW0539	2(5H)-Furanone, 5-ethyl-	Heterocyclic compound	spice	2407-43-4	966	1.11194e+06	1.11568e+06	1.12206e+06
59	XMW0914	Ethanone, 1-(1H-pyrazol-4-yl)-	Heterocyclic compound	-	25016-16-4	1156	1.49773e+07	1.86538e+07	2.0801e+07
60	NMW0059	4-Aminopyridine	Heterocyclic compound	-	504-24-5	1158	3.11099e+06	3.80027e+06	4.28056e+06
61	XMW0487	2-Picoline, 6-nitro-	Heterocyclic compound	-	18368-61-1	1183	151005	219196	2.90636e+06
62	XMW0445	6-Ethyl-5,6-dihydro-2H-pyran-2-one	Heterocyclic compound	-	19895-35-3	1160	1.99882e+06	2.43657e+06	2.72672e+06
63	XMW0430	2-Piperidinimine	Heterocyclic compound	-	22780-54-7	824	2.39342e+06	2.45989e+06	2.55162e+06
64	XMW1385	3-Imidazol-1-ylpropanenitrile	Heterocyclic compound	-	23996-53-4	1159	1.73025e+06	2.12481e+06	2.3693e+06
65	D188	Pyrazinamide	Heterocyclic compound	-	98-96-4	1250	1.62339e+06	1.86342e+06	1.93647e+06
66	D364	2-Ethoxy-3-methylpyrazine	Heterocyclic compound	hazelnut, roasted, almond, pineapple, earthy	32737-14-7	1065	717911	810950	848305
67	XMW0444	1,2,4,5-Tetrazin-3-Amine	Heterocyclic compound	-	79329-74-1	967	487139	507385	574247
68	XMW1290	3-n-Propyl-2-pyrazolin-5-one	Heterocyclic compound	-	29211-70-9	1071	263521	283734	293576
69	XMW0492	2,5-Pyrrolidinedione, 1-ethyl-	Heterocyclic compound	-	2314-78-5	1191	199449	230714	243566
70	NMW0212	2H-Indol-2-one, 1,3-dihydro-	Heterocyclic compound	-	59-48-3	1487	78233.1	154308	182632
71	NMW0031	Hygrine	Heterocyclic compound	-	496-49-1	1092	147003	160409	174306
72	XMW1172	3,6-Dimethyl-4H-furo[3,2-c]pyran-4-one	Heterocyclic compound	-	36745-38-7	1378	122767	65666.1	103393
73	XMW0168	3-Butylthiophene	Heterocyclic compound	-	34722-01-5	1093	216985	46568.3	82060.5
74	XMW0663	3,5-Dimethyl-1-butylpyrazole	Heterocyclic compound	-	2655-37-0	1192	50071	57676	77457.8
75	D392	Ethanone, 1-(3-pyridinyl)-	Heterocyclic compound	sweet, nutty, dry, hawthorn, phenol, woody, popcorn	350-03-8	1112	550196	413450	378035
76	XMW0425	6-Quinolinamine, 2-methyl-	Heterocyclic compound	-	65079-19-8	1650	27539.5	52491	63741.7
77	NMW0033	2(1H)-Pyridinone	Heterocyclic compound	-	142-08-5	1094	176331	19935.7	48117.1
78	NMW0284	9H-Xanthene	Heterocyclic compound	-	92-83-1	1661	14851	28401.9	36743.8
79	D335	Pyrazine, (2-methylpropyl)-	Heterocyclic compound	green, vegetable, fruity	29460-92-2	1074	447514	120204	122403
80	XMW1332	2,2'-Bifuran, octahydro-	Heterocyclic compound	-	1592-33-2	1079	74395.5	20193	18596.5
81	XMW0910	1H-Imidazole, 1-acetyl-	Heterocyclic compound	-	2466-76-4	950	66571.2	36187.7	17525.3
82	XMW0907	2-(2-Acetoxy-1-propyl)furan, (S)	Heterocyclic compound	-	60830-70-8	1143	0	5315.75	15916.2
83	XMW1208	1H-Tetrazole	Heterocyclic compound	-	288-94-8	1019	19306.5	17365.2	15717.8
84	XMW0267	2-Ethylpiperidine	Heterocyclic compound	-	1484-80-6	1026	7858.51	10689.5	10759.1
85	XMW0488	2-Acetylpyrrolidine	Heterocyclic compound	-	60026-20-2	1042	6672.75	7766.75	9196.5
86	WMW0081	cis-2-(2-Pentenyl)furan	Heterocyclic compound	-	70424-13-4	1002	17284.2	10495	7931.33
87	XMW0929	Benzofuran, 4,7-dimethyl-	Heterocyclic compound	-	28715-26-6	1220	20223.8	11093.2	7737.42
88	XMW1068	4-Methylurazole	Heterocyclic compound	-	16312-79-1	1039	8088.41	4587.77	3141.13
89	XMW0732	1-Pentanone, 1-(1H-imidazol-4-yl)-	Heterocyclic compound	-	69393-15-3	1371	85949.2	61680.3	0
90	D81	2-Furanpropanoic acid, ethyl ester	Heterocyclic compound	pineapple, fruity, spicy, jammy	10031-90-0	1192	287188	324543	394883
91	D253	2-Acetyl-3-methylpyrazine	Heterocyclic compound	nutty, flesh, roasted hazelnut, toasted grain, corn, chip, vegetable, nut skin, caramel	23787-80-6	1082	283986	186611	144352
92	WMW0176	2H-Pyran-2-one, tetrahydro-6-methyl-	Heterocyclic compound	creamy, fruity, coconut	823-22-3	1095	216255	194662	212036
93	KMW0266	2-Thiophenemethanethiol	Heterocyclic compound	roasted, coffee, fishy	6258-63-5	1105	210099	42549.7	75858
94	KMW0182	Furan, 2-pentyl-	Heterocyclic compound	fruity, green, earthy, beany, vegetable, metallic	3777-69-3	993	201313	159479	143685
95	XMW0522	Pyridine, 3-propyl-	Heterocyclic compound	sweet, musty, beany, earthy, woody	4673-31-8	986	157958	81085.5	63555.1
96	D385	5,6,7,8-Tetrahydroquinoxaline	Heterocyclic compound	musty, nutty, roasted, beany, cereal, corn, chip, cheese	34413-35-9	1212	141226	414702	421748
97	XMW0714	3-Acetyl-1H-pyrroline	Heterocyclic compound	roasted	1072-82-8	1035	121477	103211	94972.9
98	KMW0244	Pyrazine, 2-methyl-5-(1-methylethyl)-	Heterocyclic compound	green, coffee, nutty, earthy	13925-05-8	1059	81595.4	67015.3	74075.8
99	XMW0051	4-Pyridinecarboxaldehyde	Heterocyclic compound	fruity	872-85-5	976	79836.2	103602	101692
100	KMW0188	2-Methyl-1,3-dithiacyclopentane	Heterocyclic compound	sulfury, alliaceous, smoky, savory, vegetable	5616-51-3	1026	64858	44841.6	37977
101	D323	Pyrazine, 2-methyl-3-(methylthio)-	Heterocyclic compound	roasted meat, nutty, almond, vegetable	2882-20-4	1184	42719.3	46467.3	49363.2
102	XMW1448	3,6-Dimethyl-2,3,3a,4,5,7a-hexahydrobenzofuran	Heterocyclic compound	herbal, dill	70786-44-6	1192	18696.3	23066.2	47387.3
103	XMW1061	Thiophene, 2-hexyl-	Heterocyclic compound	floral, fruity, gassy, green, meaty	18794-77-9	1277	13932.4	17829.6	20135
104	D442	2(3H)-Furanone, 5-butyldihydro-4-methyl-	Heterocyclic compound	tonka, coumarin, coconut, toasted, nutty, celery, burnt	39212-23-2	1302	10504	9391.51	4655.78
105	XMW1454	Isomaltol	Heterocyclic compound	burnt, caramel, fruity	3420-59-5	989	8807.61	8659.02	8209.47
106	XMW0713	2-Cyclohexen-1-one, 3-methyl-	Ketone	nutty, caramel, phenol, cherry	1193-18-6	1075	2.66224e+07	2.85922e+07	2.93439e+07
107	XMW0201	4-Hexen-3-one	Ketone	pungent, ethereal, spicy, green, tropical, metallic	2497-21-4	855	9.06166e+06	6.58441e+06	5.63935e+06
108	XMW1331	2-Propanone, 1-(4-methoxyphenyl)-	Ketone	sweet, fruity, creamy, spicy, green, anisic, balsamic, licorice, fennel	122-84-9	1385	5.02192e+06	3.37905e+06	4.70666e+06
109	XMW0925	Camphenone, 6-	Ketone	-	55659-42-2	1114	2.40247e+07	1.22044e+07	8.4788e+06
110	XMW0648	3-Hexanone, 2,2-dimethyl-	Ketone	-	5405-79-8	868	4.78949e+06	3.56686e+06	2.95043e+06
111	IS-04	3-Hexanone-2,2,4,4-d4	Ketone	-	24588-54-3	780.6001034661149	2.05568e+06	2.16566e+06	2.22313e+06
112	D110	Bicyclo[3.1.1]heptan-3-one, 2-hydroxy-2,6,6-trimethyl-	Ketone	-	10136-65-9	1256	630085	627524	606158
113	KMW0067	3-Penten-2-one, 4-methyl-	Ketone	pungent, earthy, vegetable, acrylate	141-79-7	798	321223	423868	855848
114	XMW0900	3-Cyclohexen-1-one, 3,5,5-trimethyl-	Ketone	-	471-01-2	1044	156423	196721	211315
115	D394	Cyclohexanone, 2-(1-mercapto-1-methylethyl)-5-methyl-, (2S-trans)-	Ketone	-	35117-85-2	1366	191958	123892	165858
116	XMW1222	2,4-Dioxabicyclo[3.2.0]hept-6-en-3-one, 1,5-dichloro-6,7-dimethyl-	Ketone	-	35436-20-5	1380	123142	80644	111773
117	XMW0119	Cyclopentanone, 2-methyl-3-(1-methylethyl)-	Ketone	-	54549-81-4	1028	101507	100614	89771.9
118	XMW0890	1-Hepten-6-one, 2-methyl-	Ketone	-	10408-15-8	966	65079.7	68698.8	73391.4
119	WMW0205	2,5-Octanedione	Ketone	-	3214-41-3	984	95837.7	70272.1	50441.8
120	XMW0949	1-Decen-3-one	Ketone	-	56606-79-2	1141	17399.1	37453.3	30970.7
121	KMW0260	2-Cyclopenten-1-one, 2-hydroxy-3,4-dimethyl-	Ketone	strong, caramel	21835-00-7	1075	228100	242871	248126
122	XMW0553	2-Acetoxyacetophenone	Ketone	-	7250-94-4	1409	12307.1	9460.6	11157
123	XMW1465	7-Oxabicyclo[4.1.0]heptan-2-one, 6-methyl-3-(1-methylethyl)-	Ketone	-	5286-38-4	1256	9018.5	9223	8980
124	XMW0162	3-Penten-2-one, 4-(acetyloxy)-, (Z)-	Ketone	-	38365-58-1	1005	9256.85	7564.95	8187.82
125	XMW0186	3,5-Octadien-2-one, (E,E)-	Ketone	fruity, green, grassy	30086-02-3	1073	145198	105492	80637
126	KMW0736	Apocynin	Ketone	faint, sweet, vanillin	498-02-2	1487	141210	292027	337646
127	NMW0040	Benzyl methyl ketone	Ketone	almond	103-79-7	1124	93473.8	83923.5	67837.4
128	KMW0176	5-Hepten-2-one, 6-methyl-	Ketone	herbal, green, citrus, musty, lemon grass	110-93-0	986	58725.7	54847.8	49061.3
129	XMW0926	Ethanone, 1-(2,4-dimethylphenyl)-	Ketone	floral, woody, sweet, mimosa, minty	89-74-7	1253	41245	33773	36099.4
130	XMW0486	Cyclohexanone, 2,2,6-trimethyl-	Ketone	pungent, thujone, labdanum, honey, cistus	2408-37-9	1036	33155.6	40010.2	41229
131	KMW0378	1-(4-methylphenyl)-Ethanone	Ketone	green, pea, bell pepper, galbanum	122-00-9	1183	18150.5	17139.2	14716.2
132	XMW0717	Ethanone, 1-(2-methylphenyl)-	Ketone	sweet, hawthorn, powdery, anisic, coumarin, phenol, burnt, nutty, honey	577-16-2	1173	16240.3	20698.9	17948.3
133	KMW0078	8-Nonen-2-one	Ketone	fruity, baked	5009-32-5	1085	15616.5	5534.39	5728.82
134	XMW1256	2-Butanone, 4-(2,6,6-trimethyl-1,3-cyclohexadien-1-yl)-	Ketone	floral	20483-36-7	1424	15475	35743.8	47341.7
135	NMW0290	Xanthoxylin	Ketone	borneol, camphor	90-24-4	1669	11638.6	25656.8	34065.2
136	XMW0927	2,6,6-Trimethyl-2-cyclohexene-1,4-dione	Ketone	musty, woody, sweet, tea, tobacco, leafy	1125-21-9	1145	8353.11	12477.6	19665.5
137	KMW0233	Acetophenone	Ketone	sweet, pungent, hawthorn, mimosa, almond, acacia	98-86-2	1065	6304.5	7784.75	6507.75
138	XMW0025	Paroxypropione	Ketone	phenol	70-70-2	1349	1992.16	0	98778.7
139	D74	4-Acetylanisole	Ketone	sweet, hawthorn, anisic, balsamic, acacia	100-06-1	1348	0	0	5.07749e+06
140	WMW0126	1,3-Hexadiene, 3-ethyl-2-methyl-	Hydrocarbons	nutty	61142-36-7	1031	572566	341208	234449
141	XMW0097	1,5-Cycloundecadiene, 8,8-dimethyl-9-methylene-	Hydrocarbons	-	62338-54-9	1485	1.31151e+06	2.61637e+06	3.14738e+06
142	WMW0222	1-Dodecene	Hydrocarbons	-	112-41-4	1190	2.17889e+06	2.50901e+06	2.64003e+06
143	XMW1094	Megastigma-4,6(Z),8(E)-triene	Hydrocarbons	-	51468-85-0	1373	2.55611e+06	1.76778e+06	2.3336e+06
144	XMW0452	2,4,6-Octatriene, 3,4-dimethyl-	Hydrocarbons	-	57396-75-5	1121	6.90951e+06	3.27254e+06	2.21346e+06
145	XMW0604	Octane, 2,3,3-trimethyl-	Hydrocarbons	-	62016-30-2	966	1.48704e+06	1.54858e+06	1.66347e+06
146	NMW0010	Dicyclopentadiene	Hydrocarbons	-	77-73-6	1003	1.16817e+06	1.11909e+06	1.20654e+06
147	XMW0420	Undecane, 2,9-dimethyl-	Hydrocarbons	-	17301-26-7	1233	800913	1.02878e+06	1.12806e+06
148	XMW0373	Undecane, 2-methyl-	Hydrocarbons	-	7045-71-8	1164	752526	933445	1.05089e+06
149	XMW1392	2-Methyl-7-exo-vinylbicyclo[4.2.0]oct-1(2)-ene	Hydrocarbons	-	107914-89-6	1112	3.03359e+06	1.535e+06	1.04724e+06
150	XMW0586	Dodecane, 5-methyl-	Hydrocarbons	-	17453-93-9	1255	674252	860713	941750
151	D316	Adamantane	Hydrocarbons	-	281-23-2	1116	2.48482e+06	1.19262e+06	776625
152	XMW0202	cis-2,6-Dimethyl-2,6-octadiene	Hydrocarbons	-	2492-22-0	985	825085	621562	564496
153	XMW1337	Nonane, 3-methyl-5-propyl-	Hydrocarbons	-	31081-18-2	1185	257957	296621	312808
154	WMW0145	Undecane, 4,6-dimethyl-	Hydrocarbons	-	17312-82-2	1196	118045	168733	168818
155	XMW0602	Undecane, 5,7-dimethyl-	Hydrocarbons	-	17312-83-3	1190	117144	108932	167018
156	XMW1393	1-Undecyne	Hydrocarbons	-	2243-98-3	1095	388260	66253.9	144728
157	XMW0416	1,3-Cyclohexadiene, 5-butyl-	Hydrocarbons	-	30168-57-1	1043	221310	133212	114180
158	XMW0801	Cyclohexene, 3,4-diethenyl-1,6-dimethyl-	Hydrocarbons	-	61142-14-1	1153	0	40496	105163
159	XMW0943	Undecane, 3,5-dimethyl-	Hydrocarbons	-	17312-81-1	1207	70303.2	59996.6	73125.1
160	WMW0082	1,10-Undecadiene	Hydrocarbons	-	13688-67-0	1095	165275	41475.8	67237.3
161	XMW0100	Octane, 5-ethyl-2-methyl-	Hydrocarbons	-	62016-18-6	986	83370.6	66023.7	50372.1
162	ZMW0002	Tetracosane	Hydrocarbons	-	646-31-1	2400	50471.4	37198.6	28997.9
163	XMW0771	1,5-Cyclooctadiene, 3,4-dimethyl-	Hydrocarbons	-	21284-05-9	1046	43373.5	35778.7	28614.2
164	XMW0281	Decane, 5-methyl-	Hydrocarbons	-	13151-35-4	1057	11505.2	17657.1	15850.2
165	XMW0367	Undecane, 2,4-dimethyl-	Hydrocarbons	-	17312-80-0	1208	8229.61	12825.6	14978.5
166	XMW0240	3-Ethyl-3-methylheptane	Hydrocarbons	-	17302-01-1	953	68577.3	35446.6	14104.3
167	WMW0130	1-Pentadecene	Hydrocarbons	-	13360-61-7	1492	6442	12196.2	12650.7
168	XMW0403	Nonane, 2,5-dimethyl-	Hydrocarbons	-	17302-27-1	1021	12602.8	17270	12559.5
169	XMW0023	4-methyl-1-(1-methylethyl)-Bicyclo[3.1.0]hex-2-ene	Hydrocarbons	-	28634-89-1	966	5497.25	5472.75	5848.75
170	WMW0214	Nonane, 4,5-dimethyl-	Hydrocarbons	-	17302-23-7	1046	7667.42	6357.66	4999.07
171	XMW1065	Octane, 2,6,6-trimethyl-	Hydrocarbons	-	54166-32-4	966	6119.32	6273.5	4662.01
172	KMW0208	Decane	Hydrocarbons	alkane	124-18-5	1000	44855.7	59802.8	51658.7
173	KMW0551	Tetradecane	Hydrocarbons	mild, waxy	629-59-4	1400	19395.2	33657.2	31314.6
174	KMW0488	Tridecane	Hydrocarbons	alkane	629-50-5	1300	8709.75	13127.8	12630
175	KMW0312	Furan, 3-(4-methyl-3-pentenyl)-	Terpenoids	woody	539-52-6	1101	1.25165e+07	9.47251e+06	8.67789e+06
176	KMW0444	Carvone	Terpenoids	minty, licorice	99-49-0	1242	3.71652e+06	4.77658e+06	5.24739e+06
177	KMW0370	2-Methylisoborneol	Terpenoids	earthy, musty	2371-42-8	1198	2.48854e+06	2.80152e+06	3.06022e+06
178	KMW0374	4-Hexen-1-ol, 5-methyl-2-(1-methylethenyl)-, (R)-	Terpenoids	herbal	498-16-8	1170	2.02861e+06	2.45253e+06	2.74936e+06
179	KMW0254	1,5-Heptadien-4-one, 3,3,6-trimethyl-	Terpenoids	herbal, honey, minty, berry	546-49-6	1062	1.86909e+06	2.05692e+06	2.21222e+06
180	KMW0430	Citronellol	Terpenoids	floral, rose, lime	106-22-9	1228	1.8363e+06	2.37413e+06	2.59019e+06
181	KMW0386	cis-Dihydrocarvone	Terpenoids	herbal, warm	3792-53-8	1195	1.09318e+06	1.22953e+06	1.32539e+06
182	KMW0217	D-Limonene	Terpenoids	citrus	5989-27-5	1030	948018	612468	448974
183	WMW0194	Thujone	Terpenoids	cedar leaf	546-80-5	1103	919737	999459	1.11417e+06
184	KMW0620	Benzene, 1-(1,5-dimethyl-4-hexenyl)-4-methyl-	Terpenoids	herbal	644-30-4	1483	871987	1.72366e+06	2.09668e+06
185	KMW0247	.beta.-Phellandrene	Terpenoids	terpenic, herbal	555-10-2	1031	840192	479713	338903
186	XMW0127	o-Cymene	Terpenoids	gasoline	527-84-4	1022	593168	397359	326375
187	WMW0040	trans-.beta.-Ocimene	Terpenoids	sweet, herbal	3779-61-1	1049	557337	300349	259817
188	KMW0235	1,3,6-Octatriene, 3,7-dimethyl-, (Z)-	Terpenoids	warm, floral, herbal, flowery, sweet	3338-55-4	1038	553098	304437	219897
189	KMW0552	(-)-.beta.-Bourbonene	Terpenoids	herbal, woody, floral, balsamic	5208-59-3	1384	545833	353278	705240
190	KMW0199	.beta.-Myrcene	Terpenoids	musty, balsamic, spice	123-35-3	991	493578	354527	318008
191	D197	3-Oxatricyclo[4.1.1.0(2,4)]octane, 2,7,7-trimethyl-	Terpenoids	green	1686-14-2	1095	457137	69482	141456
192	KMW0556	Naphthalene, decahydro-4a-methyl-1-methylene-7-(1-methylethenyl)-, [4aR-(4a.alpha.,7.alpha.,8a.beta.)]-	Terpenoids	herbal	17066-67-0	1486	441920	871490	1.0722e+06
193	KMW0301	Bicyclo[3.1.0]hexan-2-ol, 2-methyl-5-(1-methylethyl)-, (1.alpha.,2.alpha.,5.alpha.)-	Terpenoids	woody, balsamic	17699-16-0	1070	261150	49811.5	53073.1
194	KMW0296	Cyclohexene, 1-methyl-4-(1-methylethylidene)-	Terpenoids	citrus, pine	586-62-9	1088	250824	185459	151621
195	KMW0198	.alpha.-Phellandrene 1	Terpenoids	citrus, herbal, terpene, green, woody, peppery	99-83-2	1006	239757	162762	139730
196	XMW0544	Azulene, 1,2,3,3a,4,5,6,7-octahydro-1,4-dimethyl-7-(1-methylethenyl)-, [1R-(1.alpha.,3a.beta.,4.alpha.,7.beta.)]-	Terpenoids	musty	22567-17-5	1473	223162	439841	528040
197	KMW0223	1,3-Cyclohexadiene, 1-methyl-4-(1-methylethyl)-	Terpenoids	woody, terpene, lemon, herbal, medicinal, citrus	99-86-5	1012	204804	125157	118887
198	KMW0291	Linalool	Terpenoids	floral, green	78-70-6	1099	193041	70241.3	92148.6
199	XMW1138	6-Octen-1-ol, 7-methyl-3-methylene-	Terpenoids	-	13066-51-8	1195	8.40769e+06	9.23124e+06	1.01867e+07
200	NMW0041	(E)-4,8-Dimethylnona-1,3,7-triene	Terpenoids	-	19945-61-0	1116	1.24188e+07	9.20929e+06	8.63444e+06
201	XMW0529	Bicyclo[2.2.1]heptane, 2-chloro-1,7,7-trimethyl-, (1R-endo)-	Terpenoids	-	30462-53-4	1116	4.26504e+06	4.98674e+06	5.48884e+06
202	NMW0101	Ascaridole	Terpenoids	-	512-85-6	1244	1.287e+07	8.03214e+06	4.50441e+06
203	D306	1,5-Heptadien-4-ol, 3,3,6-trimethyl-	Terpenoids	-	27644-04-8	1084	4.08769e+06	4.00056e+06	4.27625e+06
204	NMW0074	Bicyclo[3.1.1]hept-2-ene-2-methanol, 6,6-dimethyl-	Terpenoids	woody, minty	515-00-4	1195	153483	179309	229279
205	XMW0979	(4R,4aS,6S)-4,4a-Dimethyl-6-(prop-1-en-2-yl)-1,2,3,4,4a,5,6,7-octahydronaphthalene	Terpenoids	-	823810-22-6	1476	873065	1.71717e+06	2.07862e+06
206	KMW0257	Bicyclo[3.1.0]hexan-2-ol, 2-methyl-5-(1-methylethyl)-, (1.alpha.,2.beta.,5.alpha.)-	Terpenoids	balsamic	15537-55-0	1070	122707	84226.5	88008.1
207	XMW0913	cis-Chrysanthenol	Terpenoids	-	55722-60-6	1162	333344	395391	449269
208	XMW0987	Eudesma-2,4,11-triene	Terpenoids	-	82462-31-5	1479	178068	346533	412165
209	D407	7-Octen-4-ol, 2-methyl-6-methylene-, (S)-	Terpenoids	-	35628-05-8	1097	647809	113989	220396
210	D282	Citronellyl tiglate	Terpenoids	rose, fruity, floral, geranium, leafy, tea	24717-85-9	1658	66366.7	111009	146550
211	XMW0889	Bicyclo[3.1.0]hex-2-ene, 4-methylene-1-(1-methylethyl)-	Terpenoids	-	36262-09-6	956	185640	118378	105314
212	KMW0329	Camphor	Terpenoids	camphor	76-22-2	1145	66209.9	420855	1.53586e+06
213	D370	(Z)-2,2-Dimethyl-3-(3-methylpenta-2,4-dien-1-yl)oxirane	Terpenoids	-	33281-83-3	1133	9065.83	21566.5	74342.8
214	NMW0075	Cyclohexanol, 1-methyl-4-(1-methylethylidene)-	Terpenoids	terpineol, lilac	586-81-2	1197	59983.2	89117.6	636794
215	KMW0655	5-Azulenemethanol, 1,2,3,3a,4,5,6,7-octahydro-.alpha.,.alpha.,3,8-tetramethyl-, [3S-(3.alpha.,3a.beta.,5.alpha.)]-	Terpenoids	spicy	22451-73-6	1667	56990.4	105830	137065
216	XMW0521	1,7-Octadiene, 2-methyl-6-methylene-	Terpenoids	-	1686-30-2	984	61551.6	44522.6	36634.4
217	NMW0082	(-)-trans-Isopiperitenol	Terpenoids	-	74410-00-7	1210	28719.8	25323.8	29502.2
218	XMW0264	Bicyclo[4.4.0]dec-1-ene, 2-isopropyl-5-methyl-9-methylene-	Terpenoids	-	150320-52-8	1507	11119.9	23155.1	25598.5
219	w05	2,6,10-Dodecatrienal, 3,7,11-trimethyl-	Terpenoids	floral, minty	19317-11-4	1656	50729.1	88951.8	120422
220	WMW0005	Pinocarvone	Terpenoids	minty	30460-92-5	1164	47722.9	52066.5	73707.5
221	D328	(5R,10R)-10-Methyl-6-methylene-2-(propan-2-ylidene)spiro[4.5]dec-7-ene	Terpenoids	-	28908-27-2	1495	2607.09	6440.25	4894
222	KMW0360	Levomenthol	Terpenoids	minty	2216-51-5	1171	44071.3	50149.7	53032.7
223	WMW0177	3-Cyclohexene-1-methanol, .alpha.,.alpha.,4-trimethyl-, propanoate	Terpenoids	herbal, green, old wood, citrus, geranium, tropical	80-27-3	1432	28209.5	53277.3	62262.3
224	QWM0003	2H-Pyran, 3,6-dihydro-4-methyl-2-(2-methyl-1-propenyl)-	Terpenoids	green, weedy, cortex, herbal, diphenyl, narcissus, celery	1786-08-9	1154	27002.4	14297.7	11411.3
225	KMW0606	.alpha.-Muurolene	Terpenoids	woody	10208-80-7	1499	19166.8	41622.6	40910.1
226	NMW0046	Bicyclo[3.1.1]heptan-3-ol, 6,6-dimethyl-2-methylene-, [1S-(1.alpha.,3.alpha.,5.alpha.)]-	Terpenoids	warm, woody, balsamic, fennel	547-61-5	1139	17290.5	52752.8	153538
227	KMW0595	1,3-Cyclohexadiene, 5-(1,5-dimethyl-4-hexenyl)-2-methyl-, [S-(R*,S*)]-	Terpenoids	spice, fresh, sharp	495-60-3	1495	14190.2	26921	25862.5
228	KMW0446	Citral	Terpenoids	sharp, lemon, sweet	5392-40-5	1273	13087.6	12940.4	10392.1
229	XMW0654	Ethanone, 1-(1,4-dimethyl-3-cyclohexen-1-yl)-	Terpenoids	fruity	43219-68-7	1149	7268.25	6482.75	6863
230	KMW0459	2,6-Octadienal, 3,7-dimethyl-, (E)-	Terpenoids	citrus, lemon	141-27-5	1270	5502.44	7133.27	5680.22
231	D342	2,4,6-Octatriene, 2,6-dimethyl-, (E,E)-	Terpenoids	terpene, sweet, fresh, floral	3016-19-1	1144	0	33093.5	76063.8
232	NMW0209	Undecylenic Acid	Acid	sweet, woody	112-38-9	1484	363969	714646	877939
233	NMW0353	Hippuric Acid	Acid	-	495-69-2	1806	0	136642	1.35688e+06
234	XMW1234	(2E)-2-(Acetylhydrazono)propanoic acid	Acid	-	64096-81-7	1468	101175	203583	247823
235	NMW0279	Benzenepropanoic Acid, 4-hydroxy-	Acid	-	501-97-3	1654	29729.8	56225.1	71006
236	XMW0026	Heptanoic Acid	Acid	rancid, sour, cheese, sweaty	111-14-8	1080	22249.2	5380	5669.51
237	KMW0101	Butanoic Acid, 2-methyl-	Acid	pungent, acid, roquefort, cheese	116-53-0	861	16317.6	12403.3	10709.2
238	KMW0405	Propanoic Acid, 2-methyl-	Acid	acid, sour, cheese, dairy, buttery, rancid	79-31-2	765	13095	12525.7	13435.2
239	KMW0096	Butanoic Acid, 3-methyl-	Acid	sour, stinky, feet, sweaty, cheese, tropical	503-74-2	850	11318.2	9843.25	7183.08
240	D401	2-Isopropyl-5-methylhex-2-enal	Aldehyde	herbal, lavender, woody, green, blueberry, tomato	35158-25-9	1106	8.0754e+06	6.04083e+06	5.60977e+06
241	KMW0088	2-Hexenal, (E)-	Aldehyde	green, grassy	6728-26-3	854	5.77598e+06	4.38673e+06	3.69346e+06
242	KMW0338	2-Nonenal, (E)-	Aldehyde	fatty, green, cucumber, aldehydic, citrus	18829-56-6	1162	4.83853e+06	6.00588e+06	6.70616e+06
243	KMW0729	5-Hydroxymethylfurfural	Aldehyde	fatty, buttery, musty, waxy, caramel	67-47-0	1232	2.45697e+06	3.2278e+06	3.62485e+06
244	D173	BenzeneacetAldehyde, 4-methyl-	Aldehyde	fresh, sweet, green, cortex, lilac, narcissus	104-09-6	1120	1.55329e+06	795032	628946
245	KMW0435	2-Decenal, (Z)-	Aldehyde	tallow	2497-25-8	1252	1.4597e+06	1.68654e+06	1.75376e+06
246	KMW0158	BenzAldehyde	Aldehyde	sweet, bitter, almond, cherry	100-52-7	960	563241	789875	834311
247	XMW1375	2-Pentenal, 2-methyl-	Aldehyde	aldehydic, green, fruity, alliaceous, ripe cherry, earthy	623-36-9	837	283303	302585	359080
248	KMW0122	Heptanal	Aldehyde	fresh, aldehydic, fatty, green, herbal, wine, ozonous	111-71-7	903	77408.7	60441.9	81690.9
249	KMW0047	2-Butenal, 2-methyl-	Aldehyde	pungent, green, ethereal, nutty, anisic, fruity	1115-11-3	746	62098.2	53736.6	38259.2
250	XMW0015	BenzAldehyde, 4-methyl-	Aldehyde	fruity, cherry, deep, phenol	104-87-0	1079	53873	8725.7	9659.5
251	XMW1457	BenzAldehyde, 3-methoxy-	Aldehyde	anisic	591-31-1	1196	51819.3	39225.3	59660.4
252	WMW0048	6-Nonenal, (E)-	Aldehyde	-	2277-20-5	1124	7.88187e+06	5.79801e+06	5.43968e+06
253	KMW0598	Tridecanal	Aldehyde	fresh, clean, aldehydic, soapy, citrus, petal, waxy, grapefruit, peel	10486-19-8	1513	30552.7	64973	85721.1
254	w37	2-Cyclohexene-1-carboxaldehyde, 2,6,6-trimethyl-	Aldehyde	-	432-24-6	1116	4.28159e+06	2.85521e+06	2.45083e+06
255	NMW0214	3-(4-Hydroxyphenyl)propanal	Aldehyde	-	20238-83-9	1490	864612	1.73055e+06	2.10027e+06
256	KMW0475	(2E,4Z)-2,4-Decadienal	Aldehyde	fried, fatty, geranium, green, waxy	25152-83-4	1295	28980.6	15919.9	13783
257	XMW0044	2-Propenal, 3-(dimethylamino)-	Aldehyde	-	927-63-9	764	375338	328218	331671
258	XMW0679	AcetAldehyde, tetramer	Aldehyde	-	108-62-3	1160	169727	209259	231541
259	XMW0722	1-Cyclohexene-1-carboxAldehyde, 5,5-dimethyl-3-oxo-	Aldehyde	-	56621-35-3	1285	7191.75	10386	10774.2
260	XMW0170	BenzAldehyde, 3-ethyl-	Aldehyde	-	34246-54-3	1168	3878.25	3650.83	3629.82
261	XMW0650	2-Butenal, 3-methyl-	Aldehyde	sweet, fruity, pungent, brown, nutty, almond, cherry	107-86-8	782	14753.6	22339.1	45219.1
262	XMW3734	2-hydroxy-BenzAldehyde	Aldehyde	medicnal, spicy, cinnamon, wintergreen, cool	90-02-8	1047	10850.7	10017.6	8600.59
263	GMW0087	(E)-2-Decenal	Aldehyde	waxy, fatty, earthy, green, cilantro, mushroom, aldehydic, fried, chicken, fatty, tallow	3913-81-3	1263	9205.34	8426.22	9992.07
264	XMW0269	2-Methylbutanoic anhydride	Other compound	-	1468-39-9	1190	480037	543565	579444
265	XMW1400	n-Pentyl methylphosphonofluoridate	Other compound	-	13454-59-6	1073	22030.5	23722.2	25239.5
266	D95	1-Propene, 1,3-dichloro-, (E)-	Halogenated hydrocarbons	-	10061-02-6	763	97240.5	99228.7	103869
267	D94	Benzenemethanethiol	Sulfur compounds	sharp, alliaceous, onion, sulfury, garlic, horseradish, minty, coffee	100-53-8	1092	114277	72965	69620.8
268	WMW0086	DiSulfur compounds, ethyl 1-methylethyl	Sulfur compounds	-	53966-36-2	985	44335.9	21253.6	13648.8
269	D355	2,6-Octadienenitrile, 3,7-dimethyl-, (Z)-	Nitrogen compounds	citral, lemon, aldehydic, metallic	31983-27-4	1231	1873610	2.34236e+06	2.60024e+06
270	D265	Dodecanenitrile	Nitrogen compounds	citrus, orange, peel, metallic, spicy	2437-25-4	1490	129807	242345	294054
271	D332	2-Nonenenitrile	Nitrogen compounds	green, fatty, orris	29127-83-1	1194	115551	131957	152241
272	XMW1156	Cyclopentanecarbonitrile, 3-(1-methylethylidene)-	Nitrogen compounds	-	89683-72-7	1166	3.49188e+06	4.25415e+06	4.84531e+06
273	XMW0670	Acetonitrile, 2,2'-iminobis-	Nitrogen compounds	-	628-87-5	1108	5.26031e+06	4.31643e+06	4.16117e+06
274	KMW0271	Phenol, 3-methyl-	Phenol	smoky, petroleum	108-39-4	1075	162434	172573	177648
275	KMW0382	Phenol, 2-methyl-	Phenol	phenol	95-48-7	1054	26866.8	27878.8	31015.2
276	KMW0359	Phenol, 3-ethyl-	Phenol	musty	620-17-7	1169	17953.4	16301.8	20954.5
277	XMW0455	1,3-Benzenediol, 4,5-dimethyl-	Phenol	-	527-55-9	1490	1.28173e+06	2.5746e+06	3.16689e+06
278	XMW0931	8,9-Dehydrothymol	Phenol	-	18612-99-2	1221	12996.8	7182.8	18083.9
279	XMW0615	Phenol, m-tert-butyl-	Phenol	-	585-34-2	1296	7717.75	14445	16290.6
280	XMW0300	Phenol, 3,5-dimethyl-	Phenol	balsamic, coffee	108-68-9	1171	4884.15	4529.88	4485.32
281	NMW0047	Phenol, 2-ethyl-	Phenol	phenol	90-00-6	1140	4473.76	11630.5	45169.3
282	KMW0404	Naphthalene	Aromatics	pungent, dry, tarry	91-20-3	1182	679834	759160	699704
283	XMW0581	Benzene, 1,2-dimethoxy-	Aromatics	sweet, creamy, vanilla, phenol, musty	91-16-7	1148	316970	1.74268e+06	5.68195e+06
284	KMW0273	Benzene, 1,2,4,5-tetramethyl-	Aromatics	rancid, sweet	95-93-2	1115	173493	121227	94532.5
285	KMW0433	Phenol, 4-(2-propenyl)-	Aromatics	phenol, medicinal, herbal	501-92-8	1255	90239.5	112137	114311
286	KMW0070	Benzene, 1,3-dimethyl-	Aromatics	plastic	108-38-3	866	50534.2	63031.2	52005.4
287	KMW0504	Benzene, 1-ethenyl-4-methoxy-	Aromatics	sweet	637-69-4	1156	43863.4	51023.9	43013
288	KMW0112	o-Xylene	Aromatics	geranium	95-47-6	888	33920.1	45907.3	31978.1
289	KMW0115	Styrene	Aromatics	penetrating, balsamic, gasoline	100-42-5	893	28869.7	41989.9	130999
290	KMW0150	Benzene, 1,2,4-trimethyl-	Aromatics	plastic	95-63-6	990	25712.4	14588.1	12241.5
291	NMW0158	Benzene, 1-methoxy-2-nitro-	Aromatics	-	91-23-6	1368	7.77867e+06	5.24006e+06	7.69163e+06
292	XMW0916	(5-bromopentyl)-Benzene	Aromatics	-	14469-83-1	1487	1.36036e+06	2.67246e+06	3.25635e+06
293	XMW0539	3,4-Dimethoxytoluene	Aromatics	-	494-99-5	1233	60058.3	82852.5	89338.1
294	XMW0114	Benzene, nitroso-	Aromatics	-	586-96-9	1005	83855.6	55340	48584.4
295	XMW0037	Benzene, 1-ethyl-3,5-dimethyl-	Aromatics	-	934-74-7	1059	63260.8	49485	43620.6
296	XMW1123	Benzene, 2-ethyl-1,4-dimethyl-	Aromatics	-	1758-88-9	1076	18843.5	22040.2	17716
297	XMW0011	Benzene, 1,4-diethyl-	Aromatics	-	105-05-5	1041	33420	20223	17180
298	NMW0794	Benzene, (1-methylpropyl)-	Aromatics	-	135-98-8	1001	20921.5	13523.2	12672
299	XMW1139	Naphthalene, 1,2,3,4,4a,5,6,7-octahydro-4a-methyl-	Aromatics	-	13943-77-6	1185	5752.21	5057.59	9823.66
300	KMW0608	3-Mercaptohexanol	Alcohol	sulfury, fruity, tropical	51755-83-0	1127	1.51393e+07	1.11137e+07	1.02105e+07
301	KMW0284	Phenylethyl Alcohol	Alcohol	fruity, rose, sweet, apple	60-12-8	1116	2.78765e+06	1.43358e+06	923527
302	KMW0102	1-Hexanol	Alcohol	ethereal, fusel, oily, fruity, alcoholic, sweet, green	111-27-3	868	2.07962e+06	1.54651e+06	1.279e+06
303	WMW0127	3-Octen-1-ol, (Z)-	Alcohol	fresh, fatty, grassy, melon, green, cortex, herbal, earthy, fusel, spicy	20125-84-2	1055	646770	715412	735707
304	KMW0098	3-Hexen-1-ol, (Z)-	Alcohol	fresh, green, grass, foliage, vegetable, herbal, oily	928-96-1	858	642561	459392	389533
305	WMW0217	2-Octenal, 2-butyl-	Alcohol	aldehydic, green, watery, fruity, metallic, oily, tropical, fatty, sweaty, goaty	13019-16-4	1378	529762	372050	484247
306	KMW0355	trans,cis-2,6-Nonadien-1-ol	Alcohol	green, cucumber, oily, violet, leafy	28069-72-9	1170	437776	521832	597264
307	WMW0062	3-Nonen-1-ol, (Z)-	Alcohol	fresh, waxy, green, melon, rind, tropical, mushroom	10340-23-5	1156	433633	496603	564514
308	KMW0629	1-Dodecanol	Alcohol	earthy, soapy, waxy, fatty, honey, coconut	112-53-8	1474	354788	709701	866878
309	KMW0310	2-Cyclohexen-1-ol, 1-methyl-4-(1-methylethenyl)-, trans-	Alcohol	fresh, minty	7212-40-0	1123	338838	171615	110546
310	KMW0276	1-Octanol	Alcohol	intense citrus, rose	111-87-5	1072	300328	317577	337336
311	KMW0344	1-Nonanol	Alcohol	fresh, clean, fatty, floral, rose, orange, dusty, wet, oily	143-08-8	1173	276585	330320	372881
312	KMW0323	Benzyl Alcohol	Alcohol	floral, rose, phenol, balsamic	100-51-6	1036	165576	104926	85467.1
313	KMW0092	2-Furanmethanol	Alcohol	alcoholic, chemical, musty, sweet, caramel, bread, coffee	98-00-0	851	101493	92236.1	105979
314	D245	4-Phenyl-2-butanol	Alcohol	floral, peony, foliage, sweet, mimosa, heliotrope	2344-70-9	1241	91082.3	104810	119241
315	KMW0133	1-Hexanol, 4-methyl-	Alcohol	sweaty	818-49-5	953	87759.2	55134.1	31855.9
316	KMW0062	Prenol	Alcohol	fruity, green, lavender	556-82-1	776	80865.7	54380	52894.2
317	D373	2,4-Heptadien-1-ol, (E,E)-	Alcohol	green, fruity, nutty, cheese	33467-79-7	1004	70386.5	21268.1	10074
318	WMW0058	5-Hepten-2-ol, 6-methyl-	Alcohol	sweet, oily, green, coriander	1569-60-4	994	65477	82523.2	80082.4
319	KMW0674	trans-2-Dodecen-1-ol	Alcohol	oily, fatty	69064-37-5	1478	55872.9	117375	159539
320	KMW0173	1-Octen-3-ol	Alcohol	fatty, fruity, grassy, mushroom, perfumy, sweet	3391-86-4	982	12194.9	8395	7892.26
321	XMW0117	3,4-Dimethylcyclohexanol	Alcohol	-	5715-23-1	1126	2.68931e+07	1.49217e+07	1.14025e+07
322	XMW0411	Cyclohexanol, 2,6-dimethyl-	Alcohol	-	5337-72-4	1112	2.68461e+07	1.48414e+07	1.13624e+07
323	XMW0735	Benzenemethanol, .alpha.-2-propenyl-	Alcohol	-	936-58-3	1244	7.55605e+06	9.81457e+06	1.05928e+07
324	XMW0410	1-Nonen-4-ol	Alcohol	-	35192-73-5	1103	1.50892e+07	1.11952e+07	1.03925e+07
325	D348	Cyclobutaneethanol, 1-methyl-2-(1-methylethenyl)-, cis-	Alcohol	-	30820-22-5	1183	6.71437e+06	7.62629e+06	8.07493e+06
326	XMW1233	3-Cyclopentyl-1-propanol	Alcohol	-	767-05-5	1102	6.03771e+06	4.22903e+06	3.75541e+06
327	D200	Benzenemethanol, 3-hydroxy-	Alcohol	-	620-24-6	1257	501504	649269	721086
328	WMW0083	2-Decen-1-ol, (E)-	Alcohol	waxy, fresh air, citrus, rose, rue	18409-18-2	1257	7129.5	7179	6625.5
329	D181	Glycerin	Alcohol	sweet	56-81-5	967	6409.23	8270.61	8967.5
330	D387	1-Hexanol, 3,5,5-trimethyl-	Alcohol	grassy, green, weedy, floral, earthy, aldehydic, hay, straw, leafy	3452-97-9	1047	4997.96	6707	9673.88
331	XMW0122	Cyclohexanol, 2-methyl-3-(1-methylethenyl)-, (1.alpha.,2.alpha.,3.alpha.)-	Alcohol	-	54244-81-4	1196	83054	92752.5	104089
332	XMW0642	Cyclohexanol, 3,5-dimethyl-	Alcohol	-	5441-52-1	1030	60703.9	80544.8	88190.2
333	NMW0278	Benzenepropanol, 4-hydroxy-3-methoxy-	Alcohol	-	2305-13-7	1651	24172.8	49537.6	62278.4
334	D409	(S)-2,5-Dimethyl-3-vinylhex-4-en-2-ol	Alcohol	-	35671-15-9	1039	66237.3	59957.9	58233.8
335	WMW0103	2-Cyclopentylethanol	Alcohol	-	766-00-7	1003	70797.6	55851.1	51909.9
336	WMW0122	1-Undecyn-4-ol	Alcohol	-	22127-86-2	1275	29767.3	28945.8	26402.5
337	WMW0188	2-Pentyn-1-ol	Alcohol	-	6261-22-9	778	18133.2	18948	20718
338	XMW0364	6-Undecanol	Alcohol	-	23708-56-7	1277	12060.9	14147.1	15801
339	WMW0100	3-Nonen-1-ol, (E)-	Alcohol	green, waxy, melon, cucumber	10339-61-4	1143	0	44764.5	93286.2
340	XMW0434	4-Hexen-1-ol, acetate	Alcohol	-	72237-36-6	1020	19899.2	5580	3960.66
341	NMW0145	Benzamide	Amine	-	55-21-0	1344	0	0	1.88357e+06
342	NMW0057	Glutarimide	Amine	-	1121-89-7	1154	643902	786740	889447
343	NMW0044	BenzenAmine, N-ethyl-	Amine	-	103-69-5	1128	554530	410819	387443
344	XMW1471	1-ButanAmine, N-methyl-N-2-propenyl-	Amine	-	24209-62-9	856	486366	349550	295417
345	XMW1295	1,6-HexanediAmine, N,N,N',N'-tetramethyl-	Amine	-	111-18-2	1206	43656.4	48334.6	51607
346	NMW0024	Aniline, N-methyl-	Amine	-	100-61-8	1066	10961	12331	11950
347	NMW0069	BenzenAmine, 2,5-dimethyl-	Amine	-	95-78-3	1171	6199.58	8001.16	9010.25
348	NMW0177	N-Benzylformamide	Amine	-	6343-54-0	1402	17798.9	30464.3	7349.7
349	XMW0290	4-Heptanone, oxime	Amine	-	1188-63-2	1050	0	0	2103.82

## Sheet: Stable3
Supplementary Table 3. Differentially accumulated VOCs across floral stages, pair comparisons
Number	Index	Compounds	Category	Bd vs Ib				Ib vs Fb				Bd vs Fb
				Type	Log2(fc)	P-value	VIP	Type	Log2(fc)	P-value	VIP	Type	Log2(fc)	P-value	VIP
1	XMW0951	2-Cyclohexen-1-ol, 2-methyl-5-(1-methylethenyl)-, acetate, (1R-cis)-	Ester	down	-7.14122	0.00122593	1.2129	up	11.8703	0.00550134	1.46074	up	4.72903	0.00612128	1.17336
2	KMW0411	1,6-Octadien-3-ol, 3,7-dimethyl-, formate	Ester	insig	-	-	-	insig	-	-	-	down	-1.32328	0.00524567	1.10106
3	KMW0585	Citronellyl isobutyrate	Ester	up	1.10239	0.000311413	1.14968	insig	-	-	-	up	1.30601	0.00216572	1.12246
4	KMW0421	Methyl salicylate	Ester	insig	-	-	-	up	3.99754	0.000123251	1.45818	up	4.911	9.54643e-05	1.1787
5	KMW0283	Hexanoic acid, propyl ester	Ester	insig	-	-	-	insig	-	-	-	down	-1.03278	0.00429985	1.15877
6	NMW0142	Cyclohexanol, 1-methyl-4-(1-methylethylidene)-, acetate	Ester	insig	-	-	-	up	15.5037	0.00425009	1.46216	up	15.5037	0.00425009	1.18441
7	KMW0267	Benzoic acid, methyl ester	Ester	insig	-	-	-	up	7.10677	3.91318e-05	1.46334	up	6.51299	3.91989e-05	1.18449
8	D417	3-Hexen-1-ol, acetate, (E)-	Ester	down	-2.44875	0.000122589	1.2109	down	-1.71938	1.55396e-08	1.4569	down	-4.16813	8.01329e-05	1.18346
9	XMW1192	2-Propenoic acid, 2-methyl-, 2-chloroethyl ester	Ester	up	2.88139	0.00604595	1.19743	down	-1.08772	0.0187998	1.29129	up	1.79367	0.00332096	1.16386
10	KMW0679	2-Propenoic acid, 3-phenyl-, methyl ester, (E)-	Ester	down	-11.7216	0.0331401	1.21116	up	11.3531	0.0890337	1.44285	insig	-	-	-
11	KMW0204	Acetic acid, hexyl ester	Ester	insig	-	-	-	down	-9.79168	0.00106384	1.46492	down	-10.5779	0.00064942	1.18485
12	D246	Propanoic acid, 2-methyl-, 3,7-dimethyl-2,6-octadienyl ester, (Z)-	Ester	insig	-	-	-	insig	-	-	-	up	1.27458	0.00454664	1.11366
13	XMW0904	Phosphoric acid, dibutyl 1-methylethenyl ester	Ester	up	1.00375	0.000373184	1.13496	insig	-	-	-	up	1.30806	0.00254429	1.11647
14	D333	(+)-cis-Verbenol, acetate	Ester	up	7.28618	0.001629	1.21266	insig	-	-	-	up	6.56961	0.000227906	1.18552
15	D158	2-Phenoxyethyl isobutyrate	Ester	insig	-	-	-	insig	-	-	-	up	1.24544	0.00284854	1.1191
16	XMW1258	Acetic acid, (4,6,8,9-tetramethyl-3-oxabicyclo[3.3.1]non-6-en-1-yl)methyl ester	Ester	insig	-	-	-	insig	-	-	-	up	1.2422	0.0139013	1.09461
17	KMW0516	.alpha.-Terpinyl acetate	Ester	insig	-	-	-	up	15.6517	0.00371666	1.46232	up	15.6517	0.00371666	1.18449
18	KMW0437	Acetic acid, 2-phenylethyl ester	Ester	insig	-	-	-	up	4.86413	0.00123606	1.44976	up	4.52493	0.00106976	1.15698
19	D112	Benzeneacetic acid, methyl ester	Ester	insig	-	-	-	up	10.496	0.00079247	1.46294	up	10.496	0.00079247	1.18452
20	D358	4-tert-Butylcyclohexyl acetate	Ester	up	1.02275	0.00918516	1.07439	insig	-	-	-	up	1.0042	0.00689459	1.05946
21	XMW0907	2-(2-Acetoxy-1-propyl)furan, (S)	Heterocyclic compound	up	9.20613	0.00310623	1.21315	up	1.58216	4.29755e-05	1.41094	up	10.7883	0.000224198	1.18472
22	D253	2-Acetyl-3-methylpyrazine	Heterocyclic compound	insig	-	-	-	insig	-	-	-	down	-1.15987	0.001522	1.17401
23	NMW0033	2(1H)-Pyridinone	Heterocyclic compound	down	-3.14486	0.021637	1.18738	up	1.2712	0.0064621	1.37315	down	-1.87367	0.0353248	1.09801
24	XMW0487	2-Picoline, 6-nitro-	Heterocyclic compound	insig	-	-	-	up	3.72892	3.92929e-05	1.46126	up	4.26654	1.99128e-05	1.18071
25	D335	Pyrazine, (2-methylpropyl)-	Heterocyclic compound	down	-1.89644	0.0242911	1.16436	insig	-	-	-	down	-1.87029	0.0244659	1.12914
26	XMW0910	1H-Imidazole, 1-acetyl-	Heterocyclic compound	insig	-	-	-	down	-1.04606	8.59765e-05	1.40016	down	-1.92546	0.00102097	1.16072
27	KMW0266	2-Thiophenemethanethiol	Heterocyclic compound	down	-2.30385	0.0206041	1.17194	insig	-	-	-	down	-1.4697	0.0349445	1.06757
28	XMW0522	Pyridine, 3-propyl-	Heterocyclic compound	insig	-	-	-	insig	-	-	-	down	-1.31346	9.0594e-05	1.16365
29	D442	2(3H)-Furanone, 5-butyldihydro-4-methyl-	Heterocyclic compound	insig	-	-	-	down	-1.01233	0.00378566	1.25923	down	-1.17385	0.000625149	1.08588
30	XMW1332	2,2'-Bifuran, octahydro-	Heterocyclic compound	down	-1.88136	0.027067	1.14859	insig	-	-	-	down	-2.00018	0.0252372	1.12769
31	XMW0051	4-Pyridinecarboxaldehyde	Heterocyclic compound	up	1.43676	4.09201e-08	1.19259	up	1.15901	1.51199e-09	1.35806	up	2.59578	1.93895e-09	1.18816
32	XMW0168	3-Butylthiophene	Heterocyclic compound	down	-2.22018	0.0194982	1.17052	insig	-	-	-	down	-1.40284	0.0358885	1.08595
33	XMW0425	6-Quinolinamine, 2-methyl-	Heterocyclic compound	insig	-	-	-	insig	-	-	-	up	1.21073	0.0203803	1.06662
34	NMW0212	2H-Indol-2-one, 1,3-dihydro-	Heterocyclic compound	insig	-	-	-	insig	-	-	-	up	1.22309	0.00138341	1.12139
35	NMW0284	9H-Xanthene	Heterocyclic compound	insig	-	-	-	insig	-	-	-	up	1.30695	0.0115965	1.10639
36	WMW0081	cis-2-(2-Pentenyl)furan	Heterocyclic compound	insig	-	-	-	insig	-	-	-	down	-1.12382	0.00163678	1.16386
37	D385	5,6,7,8-Tetrahydroquinoxaline	Heterocyclic compound	up	1.55407	0.000391301	1.1881	insig	-	-	-	up	1.57838	0.00121581	1.15381
38	XMW0929	Benzofuran, 4,7-dimethyl-	Heterocyclic compound	insig	-	-	-	insig	-	-	-	down	-1.38613	0.0174898	1.08808
39	XMW1068	4-Methylurazole	Heterocyclic compound	insig	-	-	-	insig	-	-	-	down	-1.36457	0.000927506	1.14639
40	XMW1448	3,6-Dimethyl-2,3,3a,4,5,7a-hexahydrobenzofuran	Heterocyclic compound	insig	-	-	-	up	1.03872	0.000251967	1.42901	up	1.34175	5.27364e-05	1.15705
41	D74	4-Acetylanisole	Ketone	insig	-	-	-	up	19.1058	0.00376021	1.46272	up	19.1058	0.00376021	1.1847
42	KMW0067	3-Penten-2-one, 4-methyl-	Ketone	insig	-	-	-	up	1.01374	0.0320537	1.20487	up	1.41378	0.0195307	1.08932
43	KMW0736	Apocynin	Ketone	up	1.04826	0.000100858	1.15869	insig	-	-	-	up	1.25767	0.0029952	1.11895
44	KMW0078	8-Nonen-2-one	Ketone	down	-1.49657	0.024383	1.13134	insig	-	-	-	down	-1.44676	0.0233516	1.05792
45	XMW0025	Paroxypropione	Ketone	down	-7.79019	9.34941e-05	1.21337	up	13.422	0.00309656	1.46225	up	5.63179	0.00328395	1.18111
46	XMW1256	2-Butanone, 4-(2,6,6-trimethyl-1,3-cyclohexadien-1-yl)-	Ketone	up	1.20775	6.13134e-05	1.17391	insig	-	-	-	up	1.61317	0.00319248	1.14363
47	NMW0290	Xanthoxylin	Ketone	up	1.14042	0.0134705	1.06847	insig	-	-	-	up	1.54938	0.0121746	1.08934
48	XMW0949	1-Decen-3-one	Ketone	up	1.10608	0.00548797	1.14387	insig	-	-	-	-	-	-	-
49	XMW0927	2,6,6-Trimethyl-2-cyclohexene-1,4-dione	Ketone	up	11.2325	0.0163596	1.19077	insig	-	-	-	up	11.1722	0.00285412	1.18891
50	KMW0233	Acetophenone	Ketone	up	1.0822	3.54953e-05	1.15474	insig	-	-	-	-	-	-	-
51	XMW0925	Camphenone, 6-	Ketone	insig	-	-	-	insig	-	-	-	down	-1.50259	0.000171987	1.15222
52	XMW0801	Cyclohexene, 3,4-diethenyl-1,6-dimethyl-	Hydrocarbons	up	12.1356	0.0230918	1.21211	up	1.37677	0.0029094	1.2782	up	13.5123	0.00159094	1.18466
53	XMW1393	1-Undecyne	Hydrocarbons	down	-2.55094	0.0177346	1.18526	up	1.12727	0.0104604	1.35817	down	-1.42368	0.0343529	1.06366
54	WMW0130	1-Pentadecene	Hydrocarbons	insig	-	-	-	up	1.14948	0.00324124	1.31879	up	1.39158	0.00193282	1.1617
55	XMW0240	3-Ethyl-3-methylheptane	Hydrocarbons	insig	-	-	-	down	-1.32952	0.000231748	1.44794	down	-2.2816	0.000394305	1.17925
56	XMW0452	2,4,6-Octatriene, 3,4-dimethyl-	Hydrocarbons	down	-1.07817	0.000945778	1.1854	insig	-	-	-	down	-1.64228	0.000151017	1.157
57	D316	Adamantane	Hydrocarbons	down	-1.059	0.001106	1.18794	insig	-	-	-	down	-1.67785	0.000182857	1.16192
58	WMW0082	1,10-Undecadiene	Hydrocarbons	down	-1.99453	0.0228313	1.1718	insig	-	-	-	down	-1.29754	0.0394891	1.05937
59	XMW0097	1,5-Cycloundecadiene, 8,8-dimethyl-9-methylene-	Hydrocarbons	insig	-	-	-	insig	-	-	-	up	1.26292	0.00235913	1.12225
60	KMW0551	Tetradecane	Hydrocarbons	insig	-	-	-	insig	-	-	-	up	1.06435	0.00372042	1.12904
61	XMW1392	2-Methyl-7-exo-vinylbicyclo[4.2.0]oct-1(2)-ene	Hydrocarbons	insig	-	-	-	insig	-	-	-	down	-1.53443	0.000278038	1.15516
62	WMW0126	1,3-Hexadiene, 3-ethyl-2-methyl-	Hydrocarbons	insig	-	-	-	insig	-	-	-	down	-1.28817	0.000370839	1.1584
63	KMW0620	Benzene, 1-(1,5-dimethyl-4-hexenyl)-4-methyl-	Terpenoids	insig	-	-	-	insig	-	-	-	up	1.26572	0.00274069	1.12172
64	D370	(Z)-2,2-Dimethyl-3-(3-methylpenta-2,4-dien-1-yl)oxirane	Terpenoids	up	1.25028	0.000175855	1.18459	up	1.7854	0.000983277	1.44416	up	3.03568	0.000653092	1.17745
65	KMW0329	Camphor	Terpenoids	up	2.6682	3.5472e-05	1.21162	up	1.86766	0.000666705	1.45399	up	4.53586	0.000350916	1.18364
66	KMW0556	Naphthalene, decahydro-4a-methyl-1-methylene-7-(1-methylethenyl)-, [4aR-(4a.alpha.,7.alpha.,8a.beta.)]-	Terpenoids	insig	-	-	-	insig	-	-	-	up	1.27871	0.00565002	1.11241
67	NMW0075	Cyclohexanol, 1-methyl-4-(1-methylethylidene)-	Terpenoids	insig	-	-	-	up	2.83704	6.3038e-05	1.45959	up	3.40819	3.60192e-05	1.18041
68	XMW0544	Azulene, 1,2,3,3a,4,5,6,7-octahydro-1,4-dimethyl-7-(1-methylethenyl)-, [1R-(1.alpha.,3a.beta.,4.alpha.,7.beta.)]-	Terpenoids	insig	-	-	-	insig	-	-	-	up	1.24256	0.00222646	1.12231
69	NMW0046	Bicyclo[3.1.1]heptan-3-ol, 6,6-dimethyl-2-methylene-, [1S-(1.alpha.,3.alpha.,5.alpha.)]-	Terpenoids	up	1.60927	0.000229565	1.16386	up	1.54127	0.000260834	1.43854	up	3.15054	0.000170766	1.17135
70	D282	Citronellyl tiglate	Terpenoids	insig	-	-	-	insig	-	-	-	up	1.14286	0.0108524	1.07668
71	XMW0264	Bicyclo[4.4.0]dec-1-ene, 2-isopropyl-5-methyl-9-methylene-	Terpenoids	up	1.05819	0.00153783	1.10564	insig	-	-	-	up	1.20292	0.000218791	1.11067
72	KMW0217	D-Limonene	Terpenoids	insig	-	-	-	insig	-	-	-	down	-1.07828	0.000173139	1.1548
73	D328	(5R,10R)-10-Methyl-6-methylene-2-(propan-2-ylidene)spiro[4.5]dec-7-ene	Terpenoids	up	1.30468	0.00652409	1.15147	insig	-	-	-	-	-	-	-
74	D407	7-Octen-4-ol, 2-methyl-6-methylene-, (S)-	Terpenoids	down	-2.50667	0.0174917	1.17491	insig	-	-	-	down	-1.55547	0.0306584	1.08636
75	KMW0247	.beta.-Phellandrene	Terpenoids	insig	-	-	-	insig	-	-	-	down	-1.30985	0.000104887	1.16361
76	WMW0040	trans-.beta.-Ocimene	Terpenoids	insig	-	-	-	insig	-	-	-	down	-1.10105	5.19224e-05	1.15323
77	KMW0235	1,3,6-Octatriene, 3,7-dimethyl-, (Z)-	Terpenoids	insig	-	-	-	insig	-	-	-	down	-1.33071	8.46144e-05	1.15294
78	KMW0655	5-Azulenemethanol, 1,2,3,3a,4,5,6,7-octahydro-.alpha.,.alpha.,3,8-tetramethyl-, [3S-(3.alpha.,3a.beta.,5.alpha.)]-	Terpenoids	insig	-	-	-	insig	-	-	-	up	1.26606	0.0220421	1.06379
79	XMW0979	(4R,4aS,6S)-4,4a-Dimethyl-6-(prop-1-en-2-yl)-1,2,3,4,4a,5,6,7-octahydronaphthalene	Terpenoids	insig	-	-	-	insig	-	-	-	up	1.25146	0.0025961	1.12087
80	KMW0296	Cyclohexene, 1-methyl-4-(1-methylethylidene)-	Terpenoids	insig	-	-	-	insig	-	-	-	down	-1.46603	0.0190725	1.12425
81	D197	3-Oxatricyclo[4.1.1.0(2,4)]octane, 2,7,7-trimethyl-	Terpenoids	down	-2.71792	0.0205168	1.17428	up	1.02564	0.0160473	1.23866	down	-1.69227	0.0335651	1.07675
82	w05	2,6,10-Dodecatrienal, 3,7,11-trimethyl-	Terpenoids	insig	-	-	-	insig	-	-	-	up	1.24722	0.00996917	1.08871
83	XMW0987	Eudesma-2,4,11-triene	Terpenoids	insig	-	-	-	insig	-	-	-	up	1.21079	0.00224874	1.12358
84	KMW0223	1,3-Cyclohexadiene, 1-methyl-4-(1-methylethyl)-	Terpenoids	insig	-	-	-	insig	-	-	-	down	-1.1049	0.00199079	1.16613
85	KMW0595	1,3-Cyclohexadiene, 5-(1,5-dimethyl-4-hexenyl)-2-methyl-, [S-(R*,S*)]-	Terpenoids	insig	-	-	-	up	1.58766	0.00453822	1.32869	up	2.0031	0.00239252	1.15846
86	KMW0291	Linalool	Terpenoids	down	-1.45851	0.0405218	1.12025	insig	-	-	-	down	-1.06687	0.0643274	1.00323
87	NMW0101	Ascaridole	Terpenoids	insig	-	-	-	insig	-	-	-	down	-1.5146	0.00173468	1.14139
88	D342	2,4,6-Octatriene, 2,6-dimethyl-, (E,E)-	Terpenoids	up	11.8443	0.00869015	1.21284	up	1.20066	0.00109895	1.32165	up	13.045	0.000591556	1.18482
89	WMW0177	3-Cyclohexene-1-methanol, .alpha.,.alpha.,4-trimethyl-, propanoate	Terpenoids	insig	-	-	-	insig	-	-	-	up	1.14218	0.00255383	1.1529
90	QWM0003	2H-Pyran, 3,6-dihydro-4-methyl-2-(2-methyl-1-propenyl)-	Terpenoids	insig	-	-	-	insig	-	-	-	down	-1.24262	0.0056995	1.12964
91	KMW0301	Bicyclo[3.1.0]hexan-2-ol, 2-methyl-5-(1-methylethyl)-, (1.alpha.,2.alpha.,5.alpha.)-	Terpenoids	down	-2.39033	0.027399	1.16627	insig	-	-	-	down	-2.29883	0.0282566	1.1258
92	KMW0606	.alpha.-Muurolene	Terpenoids	up	1.11876	6.35357e-05	1.1727	insig	-	-	-	up	1.09385	0.00501911	1.10401
93	XMW0654	Ethanone, 1-(1,4-dimethyl-3-cyclohexen-1-yl)-	Terpenoids	up	8.67246	5.91373e-05	1.19539	insig	-	-	-	up	9.03778	0.000167344	1.19031
94	NMW0353	Hippuric Acid	Acid	up	13.8901	0.00133899	1.21367	up	3.31183	0.00508369	1.44516	up	17.2019	0.00384229	1.18458
95	XMW1234	(2E)-2-(Acetylhydrazono)propanoic acid	Acid	up	1.00876	0.000265355	1.1462	insig	-	-	-	up	1.29245	0.002683	1.122
96	NMW0209	Undecylenic Acid	Acid	insig	-	-	-	insig	-	-	-	up	1.27031	0.00782547	1.10528
97	NMW0279	Benzenepropanoic Acid, 4-hydroxy-	Acid	insig	-	-	-	insig	-	-	-	up	1.25603	0.0135175	1.09762
98	XMW0026	Heptanoic Acid	Acid	down	-2.04808	0.0310989	1.15142	insig	-	-	-	down	-1.97246	0.0322692	1.11016
99	KMW0158	BenzAldehyde	Aldehyde	up	1.81337	2.69394e-07	1.19227	up	1.18249	2.29368e-09	1.35856	up	2.99586	1.26449e-10	1.18765
100	KMW0598	Tridecanal	Aldehyde	up	1.08854	0.000415637	1.15612	insig	-	-	-	up	1.48835	0.02053	1.08867
101	XMW0170	BenzAldehyde, 3-ethyl-	Aldehyde	insig	-	-	-	down	-1.25069	0.0578316	1.05893	-	-	-	-
102	D173	BenzeneacetAldehyde, 4-methyl-	Aldehyde	insig	-	-	-	insig	-	-	-	down	-1.30432	0.000252224	1.14753
103	NMW0214	3-(4-Hydroxyphenyl)propanal	Aldehyde	up	1.00111	0.000242653	1.14858	insig	-	-	-	up	1.28045	0.00291617	1.12137
104	XMW0650	2-Butenal, 3-methyl-	Aldehyde	insig	-	-	-	up	1.01736	0.0175917	1.27324	up	1.61586	0.00911645	1.13423
105	XMW0015	BenzAldehyde, 4-methyl-	Aldehyde	down	-2.62622	0.0139404	1.18101	insig	-	-	-	down	-2.47954	0.013364	1.11554
106	WMW0086	DiSulfur compounds, ethyl 1-methylethyl	Sulfur compounds	down	-1.06077	0.000467685	1.18838	insig	-	-	-	down	-1.6997	3.42284e-05	1.15064
107	D94	Benzenemethanethiol	Sulfur compounds	down	-1.12294	0.00106955	1.10925	insig	-	-	-	down	-1.67888	0.00189382	1.17739
108	D265	Dodecanenitrile	Nitrogen compounds	insig	-	-	-	insig	-	-	-	up	1.17971	0.00445054	1.11782
109	NMW0047	Phenol, 2-ethyl-	Phenol	up	1.37835	0.0280945	1.10336	up	1.95743	0.000115421	1.4098	up	3.33578	0.000506156	1.17582
110	XMW0931	8,9-Dehydrothymol	Phenol	insig	-	-	-	up	1.33209	0.00275963	1.37298	-	-	-	-
111	XMW0455	1,3-Benzenediol, 4,5-dimethyl-	Phenol	up	1.00625	0.000419473	1.13999	insig	-	-	-	up	1.30497	0.00335747	1.11744
112	XMW0615	Phenol, m-tert-butyl-	Phenol	insig	-	-	-	insig	-	-	-	up	1.07778	0.00110813	1.16104
113	XMW0581	Benzene, 1,2-dimethoxy-	Aromatics	up	2.45889	2.42867e-05	1.21079	up	1.70508	0.000502366	1.45204	up	4.16397	0.000260643	1.18338
114	KMW0115	Styrene	Aromatics	insig	-	-	-	up	1.64145	0.000862586	1.46321	up	2.18193	0.000450518	1.17761
115	XMW0011	Benzene, 1,4-diethyl-	Aromatics	insig	-	-	-	up	1.30367	0.000452261	1.34143	up	1.12368	0.000227464	1.14796
116	XMW1139	Naphthalene, 1,2,3,4,4a,5,6,7-octahydro-4a-methyl-	Aromatics	insig	-	-	-	up	1.12469	0.000153668	1.33355	-	-	-	-
117	XMW0916	(5-bromopentyl)-Benzene	Aromatics	insig	-	-	-	insig	-	-	-	up	1.25927	0.00261663	1.12018
118	KMW0150	Benzene, 1,2,4-trimethyl-	Aromatics	insig	-	-	-	insig	-	-	-	down	-1.07068	0.0001228	1.15009
119	NMW0794	Benzene, (1-methylpropyl)-	Aromatics	insig	-	-	-	insig	-	-	-	down	-1.20155	0.00119839	1.14645
120	XMW0114	Benzene, nitroso-	Aromatics	insig	-	-	-	insig	-	-	-	down	-1.08912	0.00156851	1.16191
121	KMW0629	1-Dodecanol	Alcohol	up	1.00025	0.000133408	1.15466	insig	-	-	-	up	1.28887	0.00454464	1.11812
122	KMW0674	trans-2-Dodecen-1-ol	Alcohol	up	1.07091	0.000261987	1.13781	insig	-	-	-	up	1.51369	0.00821872	1.10641
123	WMW0100	3-Nonen-1-ol, (E)-	Alcohol	up	12.2801	0.0136752	1.21274	up	1.05931	0.00589865	1.24851	up	13.3395	0.00126152	1.18454
124	D181	Glycerin	Alcohol	up	1.436	6.63484e-07	1.18315	up	1.10319	7.62104e-08	1.35495	up	2.53919	7.14332e-09	1.18374
125	NMW0278	Benzenepropanol, 4-hydroxy-3-methoxy-	Alcohol	up	1.03514	0.00877571	1.11501	insig	-	-	-	up	1.36535	0.00760521	1.11502
126	KMW0133	1-Hexanol, 4-methyl-	Alcohol	insig	-	-	-	insig	-	-	-	down	-1.46199	0.000764239	1.16758
127	XMW0434	4-Hexen-1-ol, acetate	Alcohol	down	-1.83438	6.31295e-05	1.17847	insig	-	-	-	down	-2.3289	0.000210803	1.17391
128	KMW0284	Phenylethyl Alcohol	Alcohol	insig	-	-	-	insig	-	-	-	down	-1.59382	0.00146639	1.16063
129	XMW0411	Cyclohexanol, 2,6-dimethyl-	Alcohol	insig	-	-	-	insig	-	-	-	down	-1.24044	0.000255725	1.1467
130	KMW0323	Benzyl Alcohol	Alcohol	insig	-	-	-	insig	-	-	-	down	-1.03023	0.0041129	1.1571
131	XMW0117	3,4-Dimethylcyclohexanol	Alcohol	insig	-	-	-	insig	-	-	-	down	-1.23789	0.000252134	1.14698
132	KMW0310	2-Cyclohexen-1-ol, 1-methyl-4-(1-methylethenyl)-, trans-	Alcohol	insig	-	-	-	insig	-	-	-	down	-1.61596	5.60332e-05	1.16566
133	D373	2,4-Heptadien-1-ol, (E,E)-	Alcohol	down	-1.72661	0.00597893	1.18851	down	-1.07806	0.00140371	1.31502	down	-2.80467	0.00276246	1.15583
134	NMW0145	Benzamide	Amine	insig	-	-	-	up	17.6751	0.00246345	1.46279	up	17.6751	0.00246345	1.18475
135	XMW0290	4-Heptanone, oxime	Amine	insig	-	-	-	up	7.86887	0.000251369	1.4608	up	7.86887	0.000251369	1.18405
136	NMW0069	BenzenAmine, 2,5-dimethyl-	Amine	up	10.3137	2.77691e-06	1.19586	insig	-	-	-	up	10.6415	8.60086e-05	1.19004

## Sheet: Stable4
Supplementary Table4. Major VOCs (relative content ≥1% in any stage) at three stages
Number	Compounds	FB	Ib	Fb
1	Pyrazine, 2-methoxy-3-(2-methylpropyl)-	0.147283	0.17691	0.175933
2	3,4-Dimethylcyclohexanol	0.0473378	0.0279429	0.0201725
3	Cyclohexanol, 2,6-dimethyl-	0.0472551	0.0277926	0.0201017
4	2-Cyclohexen-1-one, 3-methyl-	0.0468612	0.0535429	0.0519134
5	Camphenone, 6-	0.0422888	0.0228545	0.0150002
6	2-Hexanoylfuran	0.0311561	0.0426936	0.0435585
7	3-Mercaptohexanol	0.0266485	0.0208119	0.0180637
8	1-Nonen-4-ol	0.0265603	0.0209645	0.0183857
9	Ethanone, 1-(1H-pyrazol-4-yl)-	0.0263634	0.0349319	0.0367999
10	Isobornyl formate	0.0232141	0.0317949	0.0334247
11	Ascaridole	0.0226541	0.0150413	0.00796892
12	Furan, 3-(4-methyl-3-pentenyl)-	0.0220318	0.0177386	0.0153524
13	(E)-4,8-Dimethylnona-1,3,7-triene	0.0218598	0.0172457	0.0152755
14	1,6-Octadien-3-ol, 3,7-dimethyl-, formate	0.0205447	0.014316	0.00825176
15	Octanoic acid, methyl ester	0.0189332	0.0271487	0.029317
16	4-Hexen-3-ketone	0.0159505	0.0123302	0.00997679
17	6-Octen-1-ol, 7-methyl-3-methylene-	0.0147994	0.0172868	0.0180217
18	2-Isopropyl-5-methylhex-2-enal	0.0142145	0.0113123	0.00992445
19	6-Nonenal, (E)-	0.0138738	0.0108576	0.00962354
20	Benzene, 1-methoxy-2-nitro-	0.0136922	0.00981275	0.0136076
21	2(5H)-Furanone, 5-ethyl-3-hydroxy-4-methyl-	0.0133339	0.0161677	0.016208
22	Benzenemethanol, .alpha.-2-propenyl-	0.0133003	0.0183791	0.0187401
23	2-Propenoic acid, butyl ester	0.0125931	0.0098243	0.008026
24	2,4,6-Octatriene, 3,4-dimethyl-	0.0121623	0.00612829	0.00391591
25	Cyclobutaneethanol, 1-methyl-2-(1-methylethenyl)-, cis-	0.0118188	0.0142813	0.0142857
26	3-Cyclopentyl-1-propanol	0.0106277	0.00791945	0.00664384
27	2-Hexenal, (E)-	0.010167	0.00821477	0.00653424
28	2-Nonenal, (E)-	0.00851689	0.0112468	0.0118641
29	Benzene, 1,2-dimethoxy-	0.000557938	0.00326341	0.0100522
30	Methyl salicylate	0.000324781	0.000650813	0.0101746

## Sheet: Stable5
Supplementary Table 5. 13793 DEGs of different comparisons between floral stages
ID	Bd vs Ib			Ib vs Fb			Bd vs Fb
	Type	Log2(fc)	q-value	Type	Log2(fc)	q-value	Type	Log2(fc)	q-value
LOC114255751	up	3.96107	8.05017e-75	false	0.346899	0.642248	up	3.96107	8.05017e-75
LOC114255767	up	1.23268	1.36213e-29	false	0.0645981	0.789831	up	1.23268	1.36213e-29
LOC114255780	up	2.20247	1.35881e-202	false	0.268767	0.0695484	up	2.20247	1.35881e-202
LOC114255810	up	1.82912	1.36394e-149	false	0.144498	0.493161	up	1.82912	1.36394e-149
LOC114255811	up	1.6964	1.4183e-71	false	-0.0964192	0.620046	up	1.6964	1.4183e-71
LOC114255813	up	2.50343	9.51825e-13	false	0.442491	0.343369	up	2.50343	9.51825e-13
LOC114255824	up	3.12815	5.53386e-54	false	0.776722	6.15754e-05	up	3.12815	5.53386e-54
LOC114255864	up	1.78339	1.25885e-41	false	-0.0995454	0.714273	up	1.78339	1.25885e-41
LOC114255876	up	1.02955	7.94305e-29	false	-0.359246	0.0635141	up	1.02955	7.94305e-29
LOC114255877	up	3.91669	7.65672e-271	false	0.480234	0.00973102	up	3.91669	7.65672e-271
LOC114255882	up	1.62858	2.65445e-163	false	0.543488	1.70675e-06	up	1.62858	2.65445e-163
LOC114255906	up	1.1097	2.05756e-12	false	-0.382124	0.158269	up	1.1097	2.05756e-12
LOC114255909	up	1.76363	2.28792e-109	false	0.470399	9.51327e-06	up	1.76363	2.28792e-109
LOC114256033	up	1.01937	3.06912e-44	false	-0.147213	0.421661	up	1.01937	3.06912e-44
LOC114256048	up	3.92453	4.31944e-48	up	2.91147	4.16776e-28	up	3.92453	4.31944e-48
LOC114256083	up	3.99614	9.32508e-29	false	0.93221	0.00318182	up	3.99614	9.32508e-29
LOC114256124	up	2.30424	8.12391e-265	false	0.570311	4.83362e-09	up	2.30424	8.12391e-265
LOC114256127	up	1.14647	7.09732e-46	false	0.150149	0.341594	up	1.14647	7.09732e-46
LOC114256142	up	1.98813	1.52349e-227	false	0.0348455	0.841738	up	1.98813	1.52349e-227
LOC114256153	up	2.48564	1.50347e-64	false	-0.0403664	0.8866	up	2.48564	1.50347e-64
LOC114256170	up	2.12391	3.37223e-11	false	0.784571	0.00038781	up	2.12391	3.37223e-11
LOC114256174	up	1.1608	0.00481179	false	-0.204817	0.788847	up	1.1608	0.00481179
LOC114256177	up	1.47602	5.09778e-58	false	0.415518	0.0022362	up	1.47602	5.09778e-58
LOC114256180	up	5.11049	1.31898e-170	false	0.197619	0.469492	up	5.11049	1.31898e-170
LOC114256181	up	4.36366	5.08333e-137	false	0.602222	1.57804e-05	up	4.36366	5.08333e-137
LOC114256266	up	1.69839	6.81377e-85	false	0.401355	0.000938626	up	1.69839	6.81377e-85
LOC114256342	up	1.72784	1.47175e-65	false	0.107598	0.577527	up	1.72784	1.47175e-65
LOC114256349	up	4.75111	0	up	1.02669	3.46784e-22	up	4.75111	0
LOC114256357	up	4.3449	1.78343e-110	up	1.72546	3.34141e-25	up	4.3449	1.78343e-110
LOC114256384	up	1.94384	2.82756e-279	false	-0.0686861	0.723001	up	1.94384	2.82756e-279
LOC114256389	up	1.87005	2.48807e-40	false	0.800456	2.79194e-06	up	1.87005	2.48807e-40
LOC114256391	up	3.32812	3.66637e-227	false	0.328739	0.0198153	up	3.32812	3.66637e-227
LOC114256397	up	2.25372	0.000111983	false	0.134762	0.885602	up	2.25372	0.000111983
LOC114256402	up	1.91548	9.98923e-09	false	-0.27191	0.549859	up	1.91548	9.98923e-09
LOC114256403	up	1.37397	2.84734e-49	false	0.245774	0.111022	up	1.37397	2.84734e-49
LOC114256453	up	2.10208	0	false	0.361439	0.00678979	up	2.10208	0
LOC114256462	up	3.70477	3.81926e-06	false	0.00988533	0.992949	up	3.70477	3.81926e-06
LOC114256466	up	1.3004	2.7825e-14	false	0.0133058	0.973192	up	1.3004	2.7825e-14
LOC114256467	up	1.42798	4.09653e-35	false	0.0503784	0.892191	up	1.42798	4.09653e-35
LOC114256471	up	1.18738	5.96352e-70	false	0.0318759	0.8759	up	1.18738	5.96352e-70
LOC114256487	up	2.20986	1.1582e-251	false	0.456875	1.56015e-05	up	2.20986	1.1582e-251
LOC114256494	up	4.10609	0	up	1.27595	4.93394e-47	up	4.10609	0
LOC114256539	up	3.15991	3.54622e-13	false	0.471703	0.32797	up	3.15991	3.54622e-13
LOC114256546	up	1.10483	0.0204589	false	-0.105773	0.916684	up	1.10483	0.0204589
LOC114256595	up	2.22091	9.90547e-106	false	-0.0229475	0.928922	up	2.22091	9.90547e-106
LOC114256669	up	1.16632	1.84327e-121	false	-0.315499	0.120187	up	1.16632	1.84327e-121
LOC114256670	up	1.58504	1.13527e-84	false	0.220346	0.104395	up	1.58504	1.13527e-84
LOC114256680	up	3.47763	2.35535e-26	false	0.296156	0.363201	up	3.47763	2.35535e-26
LOC114256682	up	2.28086	8.41475e-137	false	0.371289	0.0037737	up	2.28086	8.41475e-137
LOC114256685	up	2.58672	2.25958e-211	up	1.34807	4.50862e-24	up	2.58672	2.25958e-211
LOC114256692	up	3.09169	0	false	0.105219	0.483936	up	3.09169	0
LOC114256709	up	2.95755	0	false	-0.509178	0.292985	up	2.95755	0
LOC114256714	up	1.71548	0.00411267	false	-0.5939	0.382878	up	1.71548	0.00411267
LOC114256797	up	1.41421	5.0049e-09	false	0.29277	0.521171	up	1.41421	5.0049e-09
LOC114256848	up	1.82354	9.61699e-116	false	0.108471	0.512424	up	1.82354	9.61699e-116
LOC114256849	up	1.75542	4.6838e-92	false	-0.113269	0.503586	up	1.75542	4.6838e-92
LOC114256852	up	2.11115	3.04292e-62	false	0.413625	0.00994923	up	2.11115	3.04292e-62
LOC114256857	up	2.62218	4.97571e-300	false	0.353182	0.00124513	up	2.62218	4.97571e-300
LOC114256858	up	1.94308	2.94144e-116	false	0.49287	0.000678775	up	1.94308	2.94144e-116
LOC114256961	up	4.05126	1.64635e-33	up	1.21923	0.000215922	up	4.05126	1.64635e-33
LOC114257020	up	1.11595	1.64009e-31	false	-0.150342	0.492679	up	1.11595	1.64009e-31
LOC114257083	up	3.4671	2.97567e-95	up	1.06028	2.13059e-08	up	3.4671	2.97567e-95
LOC114257119	up	3.6798	0	false	-0.250851	0.0238913	up	3.6798	0
LOC114257128	up	1.37239	6.40488e-18	false	-0.233666	0.495492	up	1.37239	6.40488e-18
LOC114257129	up	4.16759	3.45426e-236	false	0.54214	3.77479e-05	up	4.16759	3.45426e-236
LOC114257139	up	1.61876	9.26348e-40	false	0.145242	0.581738	up	1.61876	9.26348e-40
LOC114257186	up	1.91479	2.12502e-06	false	0.415316	0.429281	up	1.91479	2.12502e-06
LOC114257198	up	2.8939	0	false	0.778643	1.25841e-18	up	2.8939	0
LOC114257283	up	2.43561	1.09434e-26	false	0.571825	0.0572764	up	2.43561	1.09434e-26
LOC114257293	up	1.26353	5.92981e-101	false	0.256706	0.0808858	up	1.26353	5.92981e-101
LOC114257359	up	1.45473	0.0154365	false	-0.0310413	0.977131	up	1.45473	0.0154365
LOC114257369	up	2.41908	0	false	0.308802	0.00286269	up	2.41908	0
LOC114257373	up	1.9586	3.55951e-90	false	0.387527	0.00575766	up	1.9586	3.55951e-90
LOC114257379	up	3.88983	1.19582e-273	false	0.788302	9.1033e-13	up	3.88983	1.19582e-273
LOC114257421	up	1.18885	4.33375e-78	false	-0.315639	0.0533561	up	1.18885	4.33375e-78
LOC114257892	up	2.64387	3.70793e-176	up	1.13938	3.0526e-16	up	2.64387	3.70793e-176
LOC114257494	up	1.59445	7.11306e-246	false	0.0442996	0.800392	up	1.59445	7.11306e-246
LOC114257524	up	1.82559	9.62036e-05	false	0.116205	0.897778	up	1.82559	9.62036e-05
LOC114257540	up	2.27928	2.58495e-34	false	-0.0581578	0.855225	up	2.27928	2.58495e-34
LOC114257541	up	4.61583	9.31341e-06	false	0.0156196	0.989086	up	4.61583	9.31341e-06
LOC114257567	up	2.06752	2.59919e-20	false	0.406067	0.195738	up	2.06752	2.59919e-20
LOC114257584	up	1.26765	1.28499e-23	false	0.0481005	0.854863	up	1.26765	1.28499e-23
LOC114257611	up	2.9356	1.196e-73	false	0.0442853	0.881223	up	2.9356	1.196e-73
LOC114257642	up	2.92777	0	false	0.383658	0.0168493	up	2.92777	0
LOC114257643	up	3.702	0	false	0.822558	1.01033e-07	up	3.702	0
LOC114257648	up	2.27771	5.22758e-124	false	0.615556	2.59346e-07	up	2.27771	5.22758e-124
LOC114257665	up	5.0248	3.75282e-09	false	-0.5126	0.316127	up	5.0248	3.75282e-09
LOC114257705	up	2.08328	8.44079e-27	false	-0.019928	0.960238	up	2.08328	8.44079e-27
LOC114257725	up	1.98387	2.11212e-117	false	0.0343989	0.903011	up	1.98387	2.11212e-117
LOC114257729	up	2.76085	4.77111e-153	false	0.472554	0.000803344	up	2.76085	4.77111e-153
LOC114257776	up	1.12691	6.56675e-48	false	-0.156062	0.243792	up	1.12691	6.56675e-48
LOC114257811	up	2.69597	5.51027e-88	false	-0.474951	0.020564	up	2.69597	5.51027e-88
LOC114257846	up	1.34496	6.33095e-141	false	-0.110019	0.456212	up	1.34496	6.33095e-141
LOC114257848	up	1.79174	6.53466e-111	false	0.281525	0.0630629	up	1.79174	6.53466e-111
LOC114257863	up	3.1277	1.46619e-07	false	0.267476	0.724518	up	3.1277	1.46619e-07
LOC114257886	up	1.78607	5.45191e-51	false	0.471867	0.00425805	up	1.78607	5.45191e-51
LOC114258305	up	3.02317	1.50832e-54	up	1.00966	1.28242e-07	up	3.02317	1.50832e-54
LOC114257926	up	2.45625	1.70041e-240	false	0.679765	1.36015e-10	up	2.45625	1.70041e-240
LOC114257931	up	1.02653	1.25403e-83	false	-0.183304	0.110599	up	1.02653	1.25403e-83
LOC114257939	up	1.59873	7.13128e-76	false	0.223617	0.174737	up	1.59873	7.13128e-76
LOC114257940	up	3.11791	1.15683e-207	false	0.70443	2.38146e-08	up	3.11791	1.15683e-207
LOC114257946	up	1.75375	3.01872e-34	false	-0.0975701	0.716241	up	1.75375	3.01872e-34
LOC114257967	up	1.09722	6.67876e-08	false	-0.459981	0.182428	up	1.09722	6.67876e-08
LOC114257972	up	2.80037	1.29734e-60	false	-0.0745631	0.868165	up	2.80037	1.29734e-60
LOC114258014	up	1.35652	8.39433e-08	false	0.118973	0.809454	up	1.35652	8.39433e-08
LOC114258018	up	1.59985	5.47995e-09	false	-0.137233	0.746452	up	1.59985	5.47995e-09
LOC114258053	up	1.71504	2.63457e-74	false	0.355977	0.0137196	up	1.71504	2.63457e-74
LOC114258065	up	3.82485	2.09887e-27	false	0.429813	0.0149807	up	3.82485	2.09887e-27
LOC114258079	up	3.91857	1.61617e-164	false	0.359757	0.150742	up	3.91857	1.61617e-164
LOC114258117	up	1.35608	2.61811e-08	false	0.160638	0.7521	up	1.35608	2.61811e-08
LOC114258119	up	1.25143	5.81392e-17	false	0.12696	0.644997	up	1.25143	5.81392e-17
LOC114258122	up	1.96925	4.69035e-15	false	0.91269	0.000520235	up	1.96925	4.69035e-15
LOC114258155	up	1.67532	4.76531e-90	false	0.0831742	0.635255	up	1.67532	4.76531e-90
LOC114258271	up	2.8511	1.52201e-127	false	0.574146	3.53811e-05	up	2.8511	1.52201e-127
LOC114258295	up	2.34992	1.00896e-73	false	0.22184	0.217422	up	2.34992	1.00896e-73
LOC114258345	up	3.3278	7.06966e-22	up	1.32759	5.79081e-06	up	3.3278	7.06966e-22
LOC114258331	up	6.81437	1.64382e-236	false	0.511873	0.00197319	up	6.81437	1.64382e-236
LOC114258746	up	3.63827	8.84504e-235	up	1.33504	2.86178e-31	up	3.63827	8.84504e-235
LOC114258349	up	1.8412	7.02165e-24	false	-0.156422	0.559016	up	1.8412	7.02165e-24
LOC114258350	up	2.52878	6.21701e-159	false	0.436205	0.0376941	up	2.52878	6.21701e-159
LOC114258353	up	1.58698	1.3899e-22	false	0.497311	0.0128506	up	1.58698	1.3899e-22
LOC114258362	up	8.67276	4.17706e-12	false	0.810894	0.0912921	up	8.67276	4.17706e-12
LOC114258365	up	2.25188	1.53718e-21	false	0.120308	0.808134	up	2.25188	1.53718e-21
LOC114258366	up	2.104	5.79537e-05	false	0.0803357	0.930404	up	2.104	5.79537e-05
LOC114258399	up	1.94746	1.29333e-74	false	0.607518	3.36657e-06	up	1.94746	1.29333e-74
LOC114258407	up	2.06363	2.06572e-92	false	0.657715	6.93785e-07	up	2.06363	2.06572e-92
LOC114258415	up	1.09657	5.27377e-29	false	-0.109964	0.635645	up	1.09657	5.27377e-29
LOC114258466	up	1.55105	3.32158e-239	false	-0.0782777	0.680343	up	1.55105	3.32158e-239
LOC114258478	up	1.62972	4.08674e-149	false	0.516393	4.84287e-07	up	1.62972	4.08674e-149
LOC114258501	up	1.44604	5.69351e-45	false	-0.095134	0.641209	up	1.44604	5.69351e-45
LOC114258541	up	1.36114	1.15655e-08	false	0.269111	0.442127	up	1.36114	1.15655e-08
LOC114258559	up	2.18334	2.72755e-06	false	0.723991	0.18368	up	2.18334	2.72755e-06
LOC114258566	up	3.36374	7.40218e-27	false	0.710283	0.0262627	up	3.36374	7.40218e-27
LOC114258577	up	1.59742	4.37639e-11	false	0.202144	0.592871	up	1.59742	4.37639e-11
LOC114258607	up	2.07377	1.125e-41	false	0.563918	0.00195832	up	2.07377	1.125e-41
LOC114258614	up	1.32518	8.69471e-65	false	0.271705	0.0376646	up	1.32518	8.69471e-65
LOC114258626	up	2.39501	2.41894e-16	false	-0.546633	0.035117	up	2.39501	2.41894e-16
LOC114258764	up	2.39039	4.10754e-28	up	1.19748	1.82222e-07	up	2.39039	4.10754e-28
LOC114258714	up	3.47815	2.27724e-18	false	0.842383	0.0168462	up	3.47815	2.27724e-18
LOC114258718	up	2.32859	9.12723e-81	false	0.119315	0.599463	up	2.32859	9.12723e-81
LOC114258720	up	3.1857	0	false	0.14834	0.306547	up	3.1857	0
LOC114258738	up	1.74907	1.55693e-16	false	-0.0401863	0.924129	up	1.74907	1.55693e-16
LOC114258741	up	3.04182	1.3136e-22	false	-0.450357	0.156147	up	3.04182	1.3136e-22
LOC114259021	up	4.13063	3.25683e-69	up	1.0351	0.000105394	up	4.13063	3.25683e-69
LOC114258747	up	1.30675	4.32775e-15	false	-0.107445	0.717867	up	1.30675	4.32775e-15
LOC114259150	up	2.44589	9.12099e-29	up	1.06541	1.18805e-06	up	2.44589	9.12099e-29
LOC114258789	up	2.53737	1.24326e-23	false	0.354937	0.199103	up	2.53737	1.24326e-23
LOC114258817	up	2.32595	8.87407e-133	false	0.438903	0.000551245	up	2.32595	8.87407e-133
LOC114258840	up	1.36571	1.63e-94	false	0.230146	0.0877858	up	1.36571	1.63e-94
LOC114258841	up	2.65987	1.22092e-45	false	0.272931	0.254051	up	2.65987	1.22092e-45
LOC114258845	up	1.38427	6.52643e-15	false	-0.195021	0.554578	up	1.38427	6.52643e-15
LOC114258861	up	1.08759	5.23235e-41	false	0.08493	0.640889	up	1.08759	5.23235e-41
LOC114258872	up	2.00533	9.17777e-13	false	-0.173838	0.633152	up	2.00533	9.17777e-13
LOC114258943	up	2.52193	4.39661e-226	false	0.452645	0.0361289	up	2.52193	4.39661e-226
LOC114258950	up	1.46421	0.000291561	false	0.312541	0.689624	up	1.46421	0.000291561
LOC114258978	up	3.14272	3.36435e-27	false	0.78084	0.00891801	up	3.14272	3.36435e-27
LOC114258982	up	4.17193	4.1142e-161	false	0.611266	1.23114e-05	up	4.17193	4.1142e-161
LOC114258987	up	3.47825	4.07933e-11	false	0.847061	0.0643729	up	3.47825	4.07933e-11
LOC114259217	up	3.7621	0	up	1.30964	3.11139e-23	up	3.7621	0
LOC114259061	up	2.208	3.77876e-43	false	0.543706	0.00159915	up	2.208	3.77876e-43
LOC114259090	up	2.15391	1.91385e-30	false	-0.596197	0.000455921	up	2.15391	1.91385e-30
LOC114259685	up	3.50587	9.44942e-42	up	1.21379	2.40504e-07	up	3.50587	9.44942e-42
LOC114259163	up	1.71933	5.01988e-89	false	0.104338	0.706623	up	1.71933	5.01988e-89
LOC114259175	up	1.38746	2.47368e-19	false	-0.183934	0.443297	up	1.38746	2.47368e-19
LOC114259201	up	1.04174	0.00848452	false	-0.306112	0.613457	up	1.04174	0.00848452
LOC114259203	up	1.91417	2.70065e-68	false	0.179527	0.300622	up	1.91417	2.70065e-68
LOC114259951	up	9.18325	2.46657e-69	up	1.25138	1.63042e-25	up	9.18325	2.46657e-69
LOC114259263	up	1.28668	3.01783e-103	false	0.270278	0.0198383	up	1.28668	3.01783e-103
LOC114259305	up	1.89605	1.41668e-42	false	0.675545	0.000230688	up	1.89605	1.41668e-42
LOC114259306	up	6.38816	3.46795e-105	false	-0.116441	0.745716	up	6.38816	3.46795e-105
LOC114259314	up	1.41602	2.83089e-205	false	-0.075767	0.678321	up	1.41602	2.83089e-205
LOC114259338	up	2.46075	4.02139e-42	false	0.180075	0.503713	up	2.46075	4.02139e-42
LOC114259352	up	1.22447	1.05951e-56	false	0.225871	0.08593	up	1.22447	1.05951e-56
LOC114259357	up	1.27278	2.53965e-15	false	0.145117	0.59482	up	1.27278	2.53965e-15
LOC114259424	up	1.74088	1.16189e-13	false	0.165101	0.661463	up	1.74088	1.16189e-13
LOC114259432	up	1.14187	1.14922e-57	false	0.148492	0.289794	up	1.14187	1.14922e-57
LOC114259448	up	2.11325	1.2108e-12	false	-0.232419	0.611615	up	2.11325	1.2108e-12
LOC114259451	up	1.8351	9.40328e-190	false	0.247231	0.0445793	up	1.8351	9.40328e-190
LOC114259452	up	1.17599	3.0024e-18	false	0.0336792	0.910893	up	1.17599	3.0024e-18
LOC114259469	up	1.29741	2.40756e-15	false	-0.485308	0.00553848	up	1.29741	2.40756e-15
LOC114259504	up	2.29607	2.78158e-202	false	0.325851	0.0630803	up	2.29607	2.78158e-202
LOC114259506	up	2.03877	2.25492e-162	false	0.0697677	0.694667	up	2.03877	2.25492e-162
LOC114259510	up	3.27902	5.5708e-255	false	-0.153077	0.329729	up	3.27902	5.5708e-255
LOC114259513	up	1.74016	8.37933e-08	false	0.0814138	0.89183	up	1.74016	8.37933e-08
LOC114259529	up	2.18875	2.12314e-303	false	0.420068	2.91343e-05	up	2.18875	2.12314e-303
LOC114259534	up	1.80453	2.02922e-12	false	0.0744612	0.873471	up	1.80453	2.02922e-12
LOC114259552	up	3.09231	0	false	0.444677	4.60527e-06	up	3.09231	0
LOC114259554	up	2.66625	6.41718e-117	false	0.489002	0.000498459	up	2.66625	6.41718e-117
LOC114259645	up	2.04549	2.79156e-197	false	0.483792	1.28021e-06	up	2.04549	2.79156e-197
LOC114259664	up	1.12349	6.38623e-20	false	-0.129957	0.575962	up	1.12349	6.38623e-20
LOC114259675	up	1.22061	3.15895e-08	false	-0.0620172	0.88561	up	1.22061	3.15895e-08
LOC114291234	false	1.08935	0.000146027	false	0.352192	0.368779	up	1.08935	0.000146027
LOC114259691	up	4.25405	0	false	0.942539	1.16127e-17	up	4.25405	0
LOC114259694	up	2.07728	9.8869e-06	false	0.156857	0.833655	up	2.07728	9.8869e-06
LOC114259820	up	1.34736	1.80495e-05	false	0.354986	0.39821	up	1.34736	1.80495e-05
LOC114259834	up	1.80237	9.53961e-07	false	-0.514565	0.188995	up	1.80237	9.53961e-07
LOC114259835	up	1.39161	0.000600435	false	-0.573518	0.181186	up	1.39161	0.000600435
LOC114259840	up	3.36638	2.2783e-10	false	-0.321266	0.53921	up	3.36638	2.2783e-10
LOC114259858	up	2.92387	5.96657e-211	false	0.785983	1.17082e-07	up	2.92387	5.96657e-211
LOC114259897	up	1.23178	1.02786e-33	false	-0.148061	0.401329	up	1.23178	1.02786e-33
LOC114259927	up	1.95248	6.1984e-53	false	0.532529	0.000356491	up	1.95248	6.1984e-53
LOC114259928	up	1.39235	2.59989e-50	false	0.392407	0.00406129	up	1.39235	2.59989e-50
LOC114259937	up	2.595	9.53922e-197	false	0.453184	0.000103925	up	2.595	9.53922e-197
LOC114259938	up	2.60162	1.48715e-91	false	0.391807	0.00825973	up	2.60162	1.48715e-91
LOC114259939	up	1.02586	6.16792e-11	false	-0.349411	0.252821	up	1.02586	6.16792e-11
LOC114259949	up	5.09394	1.44894e-17	false	-0.131367	0.787988	up	5.09394	1.44894e-17
LOC114260025	up	5.05692	2.8886e-19	up	1.48362	1.33102e-05	up	5.05692	2.8886e-19
LOC114260555	up	5.34118	1.20837e-204	up	1.44861	4.20389e-14	up	5.34118	1.20837e-204
LOC114259968	up	1.56459	1.53896e-16	false	0.244064	0.420122	up	1.56459	1.53896e-16
LOC114260012	up	1.34492	2.23321e-56	false	0.107695	0.608132	up	1.34492	2.23321e-56
LOC114260023	up	1.27448	1.01166e-23	false	-0.0334783	0.902265	up	1.27448	1.01166e-23
LOC114260769	up	6.11322	3.01167e-21	up	1.03394	0.000610109	up	6.11322	3.01167e-21
LOC114260029	up	2.37611	5.47984e-18	false	0.496335	0.129863	up	2.37611	5.47984e-18
LOC114260030	up	2.79986	7.9081e-101	false	0.375205	0.0128651	up	2.79986	7.9081e-101
LOC114260076	up	3.15861	2.19715e-10	false	0.954073	0.0641301	up	3.15861	2.19715e-10
LOC114260089	up	2.42094	9.9507e-108	false	-0.132046	0.590989	up	2.42094	9.9507e-108
LOC114260091	up	4.87716	0	false	0.777937	2.59354e-08	up	4.87716	0
LOC114260099	up	3.33094	4.67891e-28	false	-0.0885101	0.831356	up	3.33094	4.67891e-28
LOC114260102	up	2.8061	5.64657e-168	false	0.229009	0.0926518	up	2.8061	5.64657e-168
LOC114260105	up	1.08362	2.17261e-20	false	-0.25591	0.232898	up	1.08362	2.17261e-20
LOC114260154	up	3.45627	2.90734e-85	false	0.617109	0.000551245	up	3.45627	2.90734e-85
LOC114260162	up	2.24955	2.58907e-146	false	0.468267	0.0108172	up	2.24955	2.58907e-146
LOC114260176	up	3.90601	1.93486e-127	false	0.377914	0.018418	up	3.90601	1.93486e-127
LOC114260182	up	1.47915	1.09156e-101	false	-0.281886	0.0211367	up	1.47915	1.09156e-101
LOC114260183	up	2.38426	2.8878e-236	false	0.416586	0.000549997	up	2.38426	2.8878e-236
LOC114260195	up	5.63544	3.03063e-28	false	-0.414816	0.138249	up	5.63544	3.03063e-28
LOC114260202	up	1.32316	5.27491e-15	false	0.298964	0.200722	up	1.32316	5.27491e-15
LOC114260237	up	1.5432	0.011952	false	-0.668876	0.334854	up	1.5432	0.011952
LOC114260242	up	2.5376	7.59237e-26	false	0.591474	0.0235416	up	2.5376	7.59237e-26
LOC114260295	up	2.72636	3.00701e-06	false	0.447529	0.830893	up	2.72636	3.00701e-06
LOC114260297	up	8.46543	1.55496e-11	false	0.93979	0.0309777	up	8.46543	1.55496e-11
LOC114260299	up	1.3873	4.55367e-46	false	0.0408744	0.868137	up	1.3873	4.55367e-46
LOC114260309	up	4.39599	0	false	0.154789	0.303084	up	4.39599	0
LOC114260312	up	1.56594	1.21746e-40	false	0.317037	0.0733705	up	1.56594	1.21746e-40
LOC114260341	up	8.44898	0	false	0.248215	0.0438924	up	8.44898	0
LOC114260351	up	3.36347	0	false	0.0958455	0.630202	up	3.36347	0
LOC114260369	up	9.19109	9.41591e-170	false	0.632815	1.88732e-05	up	9.19109	9.41591e-170
LOC114260373	up	1.79807	2.89085e-07	false	0.287705	0.585072	up	1.79807	2.89085e-07
LOC114260388	up	3.38885	0	false	0.00803933	0.97749	up	3.38885	0
LOC114260395	up	3.03277	5.75119e-58	false	0.943369	1.03558e-06	up	3.03277	5.75119e-58
LOC114260396	up	1.25063	1.61392e-46	false	0.168431	0.336857	up	1.25063	1.61392e-46
LOC114260397	up	2.30632	4.40074e-15	false	0.29501	0.509305	up	2.30632	4.40074e-15
LOC114260432	up	3.10831	3.74633e-130	false	0.101813	0.654106	up	3.10831	3.74633e-130
LOC114260454	up	1.59734	1.89614e-10	false	0.098176	0.847977	up	1.59734	1.89614e-10
LOC114260476	up	2.1611	8.75986e-49	false	0.879022	6.20773e-08	up	2.1611	8.75986e-49
LOC114260477	up	1.51811	3.08744e-06	false	0.283394	0.55921	up	1.51811	3.08744e-06
LOC114260488	up	1.88418	3.84876e-114	false	0.285285	0.0454886	up	1.88418	3.84876e-114
LOC114260502	up	2.5937	5.1066e-61	false	-0.0346531	0.912084	up	2.5937	5.1066e-61
LOC114260523	up	3.46625	3.87494e-160	false	0.702126	5.87568e-07	up	3.46625	3.87494e-160
LOC114260536	up	1.04051	2.32354e-14	false	-0.0134264	0.966079	up	1.04051	2.32354e-14
LOC114261122	up	11.5659	7.06949e-29	up	4.42085	1.98749e-183	up	11.5659	7.06949e-29
LOC114260619	up	1.25151	3.6538e-08	false	-0.475257	0.0907672	up	1.25151	3.6538e-08
LOC114260667	up	2.63366	4.97693e-12	false	0.955985	0.0171027	up	2.63366	4.97693e-12
LOC114260721	up	4.49488	3.68674e-147	false	0.837435	2.60629e-10	up	4.49488	3.68674e-147
LOC114260747	up	1.59043	3.68314e-82	false	-0.302269	0.0370588	up	1.59043	3.68314e-82
LOC114260757	up	1.7798	3.50465e-122	false	-0.00485672	0.983765	up	1.7798	3.50465e-122
LOC114260761	up	1.93674	1.30435e-36	false	0.675826	0.000117855	up	1.93674	1.30435e-36
LOC114260762	up	1.12469	1.06827e-62	false	-0.286016	0.204556	up	1.12469	1.06827e-62
LOC114260766	up	1.23681	2.55763e-41	false	0.0978329	0.645239	up	1.23681	2.55763e-41
LOC114260767	up	1.59499	6.78832e-06	false	0.434456	0.365968	up	1.59499	6.78832e-06
LOC114260768	up	1.1687	0.000847433	false	-0.157391	0.800255	up	1.1687	0.000847433
LOC114261171	up	5.44114	4.08511e-126	up	1.12039	2.14421e-10	up	5.44114	4.08511e-126
LOC114260776	up	2.61413	5.05464e-163	false	-0.0649448	0.752068	up	2.61413	5.05464e-163
LOC114260835	up	1.23948	3.57643e-74	false	0.140044	0.354864	up	1.23948	3.57643e-74
LOC114260836	up	1.65282	7.38999e-08	false	0.245126	0.586831	up	1.65282	7.38999e-08
LOC114260847	up	1.5965	5.18432e-24	false	-0.0702773	0.815591	up	1.5965	5.18432e-24
LOC114260886	up	1.24175	2.71334e-35	false	0.1272	0.572142	up	1.24175	2.71334e-35
LOC114260890	up	1.10931	2.02253e-08	false	-0.0345145	0.929491	up	1.10931	2.02253e-08
LOC114260900	up	1.56325	1.27799e-29	false	0.4762	0.00382723	up	1.56325	1.27799e-29
LOC114260911	up	2.72566	9.53683e-10	false	0.218848	0.731635	up	2.72566	9.53683e-10
LOC114260962	up	3.75695	8.96781e-237	false	0.17274	0.255057	up	3.75695	8.96781e-237
LOC114261000	up	2.52541	0	false	0.61767	8.32381e-05	up	2.52541	0
LOC114261034	up	1.32875	5.2361e-142	false	-0.323538	0.00272931	up	1.32875	5.2361e-142
LOC114261091	up	2.61922	2.35019e-55	false	-0.0665744	0.847977	up	2.61922	2.35019e-55
LOC114261172	up	5.69381	3.72783e-110	up	2.28683	1.89011e-31	up	5.69381	3.72783e-110
LOC114261157	up	1.96694	1.44656e-42	false	-0.439131	0.00935496	up	1.96694	1.44656e-42
LOC114261160	up	1.51521	3.90189e-17	false	0.0681142	0.844909	up	1.51521	3.90189e-17
LOC114261305	up	3.62081	2.13905e-89	up	2.04266	6.72995e-33	up	3.62081	2.13905e-89
LOC114261837	up	4.80325	1.86647e-28	up	2.02541	4.45387e-11	up	4.80325	1.86647e-28
LOC114261217	up	3.04878	0	false	0.369596	0.000385054	up	3.04878	0
LOC114261237	up	2.39215	1.51029e-18	false	0.635229	0.0509626	up	2.39215	1.51029e-18
LOC114261851	up	5.21017	0	up	1.56346	3.25119e-48	up	5.21017	0
LOC114261310	up	2.15554	0	false	0.227616	0.38864	up	2.15554	0
LOC114261330	up	1.76846	2.16902e-24	false	-0.224113	0.361628	up	1.76846	2.16902e-24
LOC114261338	up	2.23047	4.0514e-198	false	0.28243	0.0335611	up	2.23047	4.0514e-198
LOC114261383	up	1.62551	6.64676e-86	false	-0.25976	0.0603118	up	1.62551	6.64676e-86
LOC114261399	up	1.54687	1.51885e-17	false	-0.400706	0.0388081	up	1.54687	1.51885e-17
LOC114261871	up	9.63476	2.12937e-15	up	2.92691	1.37179e-31	up	9.63476	2.12937e-15
LOC114261430	up	5.21337	8.36011e-66	false	0.977995	9.04483e-06	up	5.21337	8.36011e-66
LOC114261498	up	3.40904	1.0501e-07	false	0.570826	0.41639	up	3.40904	1.0501e-07
LOC114261526	up	2.04553	2.24e-240	false	0.552053	3.22334e-06	up	2.04553	2.24e-240
LOC114261536	up	2.39803	1.26804e-155	false	0.70657	1.5168e-08	up	2.39803	1.26804e-155
LOC114261597	up	1.84564	4.15171e-15	false	0.16665	0.691089	up	1.84564	4.15171e-15
LOC114261600	up	2.01245	3.28889e-140	false	0.00665615	0.984328	up	2.01245	3.28889e-140
LOC114261708	up	1.37138	4.43037e-36	false	0.0184587	0.944427	up	1.37138	4.43037e-36
LOC114261714	up	2.26767	2.52809e-27	false	0.665085	0.00290624	up	2.26767	2.52809e-27
LOC114261717	up	1.24763	3.94024e-27	false	-0.600901	3.38102e-06	up	1.24763	3.94024e-27
LOC114261723	up	1.30121	1.90203e-136	false	0.000270359	0.998903	up	1.30121	1.90203e-136
LOC114261752	up	1.09545	5.02359e-47	false	-0.0553747	0.785118	up	1.09545	5.02359e-47
LOC114261764	up	1.51359	1.86539e-13	false	0.479111	0.111404	up	1.51359	1.86539e-13
LOC114261778	up	1.21858	2.91006e-66	false	-0.671556	2.42665e-11	up	1.21858	2.91006e-66
LOC114261785	up	2.05404	6.15178e-33	false	0.542826	0.00781117	up	2.05404	6.15178e-33
LOC114261796	up	1.49175	2.54889e-204	false	0.322343	0.000832796	up	1.49175	2.54889e-204
LOC114261797	up	1.13953	5.71041e-41	false	0.151114	0.542209	up	1.13953	5.71041e-41
LOC114261801	up	2.4998	9.12224e-09	false	0.0721892	0.92502	up	2.4998	9.12224e-09
LOC114261817	up	4.84848	0	false	0.290816	0.0123144	up	4.84848	0
LOC114262090	up	2.37731	4.73151e-82	up	1.0255	4.51253e-13	up	2.37731	4.73151e-82
LOC114261847	up	1.62716	0.00474859	false	-0.688128	0.273244	up	1.62716	0.00474859
LOC114262184	up	3.51347	8.79188e-61	up	1.78744	1.80047e-16	up	3.51347	8.79188e-61
LOC114262235	up	2.26976	2.18288e-10	up	1.02538	0.00552074	up	2.26976	2.18288e-10
LOC114261900	up	3.10595	1.44513e-30	false	0.39914	0.147286	up	3.10595	1.44513e-30
LOC114261901	up	3.07797	7.5111e-15	false	0.544352	0.194217	up	3.07797	7.5111e-15
LOC114261903	up	2.46796	1.01186e-78	false	0.950757	2.36162e-10	up	2.46796	1.01186e-78
LOC114261908	up	1.88732	1.63685e-92	false	0.71636	3.19815e-08	up	1.88732	1.63685e-92
LOC114261957	up	1.79119	0.00011673	false	-0.0860194	0.911772	up	1.79119	0.00011673
LOC114261983	up	1.09048	2.98653e-28	false	0.0687228	0.783547	up	1.09048	2.98653e-28
LOC114262033	up	1.66648	1.45593e-15	false	0.620293	0.0266993	up	1.66648	1.45593e-15
LOC114262034	up	1.62221	8.31652e-60	false	-0.522086	0.00010433	up	1.62221	8.31652e-60
LOC114262040	up	1.12612	1.54359e-48	false	0.12884	0.425506	up	1.12612	1.54359e-48
LOC114262041	up	2.18424	6.7682e-53	false	0.260614	0.190921	up	2.18424	6.7682e-53
LOC114262060	up	1.77206	2.81585e-08	false	0.563884	0.189085	up	1.77206	2.81585e-08
LOC114262063	up	1.08649	1.07863e-10	false	-0.47491	0.0154331	up	1.08649	1.07863e-10
LOC114262069	up	2.9572	1.97679e-33	false	0.268421	0.369085	up	2.9572	1.97679e-33
LOC114262070	up	5.2675	1.16061e-56	false	-0.232046	0.357297	up	5.2675	1.16061e-56
LOC114262083	up	3.68593	1.47835e-58	false	0.999298	3.12432e-06	up	3.68593	1.47835e-58
LOC114262315	up	3.83058	1.01938e-140	up	1.77897	2.0597e-23	up	3.83058	1.01938e-140
LOC114262102	up	1.61296	3.03614e-10	false	0.388627	0.368935	up	1.61296	3.03614e-10
LOC114262629	up	3.18298	3.35265e-250	up	1.2652	2.25423e-31	up	3.18298	3.35265e-250
LOC114262193	up	1.47757	7.85372e-211	false	0.354	0.000279468	up	1.47757	7.85372e-211
LOC114262234	up	1.5538	1.63288e-26	false	0.0973925	0.767456	up	1.5538	1.63288e-26
LOC114263241	up	9.94786	1.90339e-21	up	1.31805	5.80804e-16	up	9.94786	1.90339e-21
LOC114262240	up	2.59443	5.96214e-09	false	0.64386	0.2056	up	2.59443	5.96214e-09
LOC114262257	up	3.09709	0	false	0.486829	5.71327e-06	up	3.09709	0
LOC114262259	up	1.61537	4.06173e-115	false	0.445205	0.00018054	up	1.61537	4.06173e-115
LOC114262266	up	3.00892	2.30131e-56	false	0.745427	3.69178e-06	up	3.00892	2.30131e-56
LOC114262289	up	1.29388	5.01551e-116	false	0.229257	0.175583	up	1.29388	5.01551e-116
LOC114262312	up	1.02461	7.0317e-05	false	-0.654412	0.0104028	up	1.02461	7.0317e-05
LOC114263310	up	5.35918	0	up	1.39288	5.02972e-46	up	5.35918	0
LOC114262332	up	1.20929	0.000636235	false	-0.0356893	0.961039	up	1.20929	0.000636235
LOC114262334	up	2.17923	2.80735e-214	false	0.579611	1.25241e-06	up	2.17923	2.80735e-214
LOC114262336	up	6.35709	1.67631e-74	false	0.780848	2.07779e-07	up	6.35709	1.67631e-74
LOC114262351	up	3.35779	1.48503e-83	false	-0.288147	0.15547	up	3.35779	1.48503e-83
LOC114262354	up	1.78922	7.32635e-05	false	-0.889446	0.0132079	up	1.78922	7.32635e-05
LOC114262359	up	1.64768	6.38097e-25	false	0.452129	0.124624	up	1.64768	6.38097e-25
LOC114262370	up	1.4751	4.52927e-10	false	0.427243	0.141517	up	1.4751	4.52927e-10
LOC114262414	up	1.73455	0.00310652	false	-0.334156	0.658791	up	1.73455	0.00310652
LOC114262450	up	1.17609	1.28881e-18	false	-0.0910611	0.77705	up	1.17609	1.28881e-18
LOC114262452	up	2.27242	1.90269e-82	false	-0.077291	0.718918	up	2.27242	1.90269e-82
LOC114262497	up	3.43441	0	false	0.294288	0.0280226	up	3.43441	0
LOC114262503	up	1.5555	1.08263e-24	false	0.301363	0.270527	up	1.5555	1.08263e-24
LOC114262506	up	2.29343	0	false	0.479761	7.94985e-07	up	2.29343	0
LOC114262520	up	1.45463	4.71064e-29	false	-0.599383	0.000214176	up	1.45463	4.71064e-29
LOC114262522	up	1.32458	3.35177e-56	false	0.202257	0.249352	up	1.32458	3.35177e-56
LOC114262542	up	2.95173	5.30457e-08	false	0.830677	0.135099	up	2.95173	5.30457e-08
LOC114262546	up	4.83653	0	false	0.66559	1.73996e-06	up	4.83653	0
LOC114262553	up	1.79605	7.14442e-06	false	-0.400354	0.401699	up	1.79605	7.14442e-06
LOC114262580	up	1.76739	5.64549e-10	false	0.079217	0.860433	up	1.76739	5.64549e-10
LOC114262616	up	1.7042	4.89848e-06	false	-0.000482036	0.999397	up	1.7042	4.89848e-06
LOC114262626	up	2.25318	0	false	-0.0708018	0.702917	up	2.25318	0
LOC114263312	up	3.13838	1.42318e-68	up	1.16189	5.70663e-11	up	3.13838	1.42318e-68
LOC114262636	up	1.66166	4.43106e-96	false	0.222747	0.0895735	up	1.66166	4.43106e-96
LOC114262638	up	1.38858	4.6999e-58	false	0.322062	0.0800914	up	1.38858	4.6999e-58
LOC114262645	up	1.58923	0.00135695	false	-0.327664	0.667705	up	1.58923	0.00135695
LOC114262669	up	1.88954	2.81911e-12	false	0.131939	0.815145	up	1.88954	2.81911e-12
LOC114262671	up	2.10961	2.52677e-134	false	0.487815	2.6142e-05	up	2.10961	2.52677e-134
LOC114262678	up	1.90523	6.18437e-10	false	0.0738114	0.894211	up	1.90523	6.18437e-10
LOC114262758	up	1.60707	4.89332e-116	false	0.139328	0.428697	up	1.60707	4.89332e-116
LOC114262790	up	2.55209	2.29283e-38	false	-0.70828	0.000140235	up	2.55209	2.29283e-38
LOC114262797	up	2.12053	1.52869e-28	false	0.27405	0.3673	up	2.12053	1.52869e-28
LOC114262803	up	1.72995	9.84867e-13	false	0.368519	0.224492	up	1.72995	9.84867e-13
LOC114262808	up	2.15438	4.8689e-98	false	0.276808	0.0485101	up	2.15438	4.8689e-98
LOC114262841	up	6.53696	8.62447e-33	false	0.519901	0.0437996	up	6.53696	8.62447e-33
LOC114262851	up	1.80966	6.54125e-15	false	0.597035	0.228711	up	1.80966	6.54125e-15
LOC114262871	up	2.81071	0	false	0.42126	0.000107344	up	2.81071	0
LOC114262880	up	1.34742	0.000116322	false	0.229679	0.76668	up	1.34742	0.000116322
LOC114262882	up	2.25969	3.66237e-290	false	-0.0890517	0.563567	up	2.25969	3.66237e-290
LOC114262932	up	1.31099	1.82529e-12	false	0.288484	0.283257	up	1.31099	1.82529e-12
LOC114262935	up	4.80946	0	false	0.935817	4.78574e-23	up	4.80946	0
LOC114262979	up	2.9509	3.15572e-07	false	0.152472	0.84979	up	2.9509	3.15572e-07
LOC114262996	up	1.36909	2.6822e-67	false	0.290135	0.037051	up	1.36909	2.6822e-67
LOC114263009	up	1.69657	6.23758e-05	false	0.116178	0.876676	up	1.69657	6.23758e-05
LOC114263015	up	1.76544	8.89022e-58	false	0.337836	0.0249146	up	1.76544	8.89022e-58
LOC114263165	up	1.87577	3.20482e-111	false	0.862113	2.40648e-15	up	1.87577	3.20482e-111
LOC114263183	up	1.56624	1.24666e-59	false	0.208836	0.172894	up	1.56624	1.24666e-59
LOC114263324	up	2.89645	1.2758e-26	up	1.03312	0.000120369	up	2.89645	1.2758e-26
LOC114263704	up	4.7608	8.13807e-114	up	1.26741	3.71811e-14	up	4.7608	8.13807e-114
LOC114263710	up	5.31258	3.19195e-91	up	2.15703	5.61276e-36	up	5.31258	3.19195e-91
LOC114263320	up	1.35075	5.50375e-06	false	-0.535353	0.00453983	up	1.35075	5.50375e-06
LOC114263713	up	5.12737	1.96459e-166	up	1.70186	1.84632e-38	up	5.12737	1.96459e-166
LOC114263325	up	2.9421	6.16569e-91	false	0.682759	0.000339938	up	2.9421	6.16569e-91
LOC114263351	up	2.23831	8.09821e-113	false	0.791659	2.48635e-08	up	2.23831	8.09821e-113
LOC114263373	up	1.86101	1.50294e-08	false	0.669168	0.0855043	up	1.86101	1.50294e-08
LOC114263381	up	3.16816	0	false	0.280512	0.132713	up	3.16816	0
LOC114263397	up	2.01685	1.11369e-35	false	0.369098	0.0630739	up	2.01685	1.11369e-35
LOC114263406	up	2.61836	8.41392e-56	false	0.909333	1.05284e-05	up	2.61836	8.41392e-56
LOC114263955	up	2.20599	3.42407e-19	up	1.06862	0.000115846	up	2.20599	3.42407e-19
LOC114263420	up	2.62507	1.03259e-76	false	0.443863	0.00643348	up	2.62507	1.03259e-76
LOC114263421	up	2.70886	1.20719e-67	false	0.436929	0.00895786	up	2.70886	1.20719e-67
LOC114263422	up	1.61088	1.05457e-32	false	0.222313	0.36382	up	1.61088	1.05457e-32
LOC114263424	up	2.05096	1.84096e-06	false	0.235265	0.710826	up	2.05096	1.84096e-06
LOC114263425	up	4.06076	0	false	0.54429	3.42295e-08	up	4.06076	0
LOC114263433	up	3.47509	3.73489e-43	false	0.503997	0.0319531	up	3.47509	3.73489e-43
LOC114263464	up	2.21395	4.18157e-31	false	0.653173	0.0019217	up	2.21395	4.18157e-31
LOC114263467	up	1.02176	6.90459e-44	false	-0.00239064	0.992949	up	1.02176	6.90459e-44
LOC114263471	up	2.94866	2.50559e-30	false	0.247523	0.532434	up	2.94866	2.50559e-30
LOC114263510	up	2.23019	3.97719e-124	false	0.841887	6.33978e-12	up	2.23019	3.97719e-124
LOC114263536	up	1.13302	0.00222693	false	0.0339892	0.967982	up	1.13302	0.00222693
LOC114264165	up	6.89896	4.06773e-121	up	1.66403	3.08134e-38	up	6.89896	4.06773e-121
LOC114263560	up	2.00391	6.97354e-26	false	0.747394	0.000270104	up	2.00391	6.97354e-26
LOC114263566	up	1.37326	7.32591e-43	false	-0.0957805	0.71734	up	1.37326	7.32591e-43
LOC114263583	up	1.55692	3.89389e-203	false	0.265361	0.0143226	up	1.55692	3.89389e-203
LOC114263589	up	1.75985	1.147e-11	false	-0.371958	0.200007	up	1.75985	1.147e-11
LOC114263623	up	6.61891	0	false	0.832479	2.56178e-16	up	6.61891	0
LOC114263686	up	3.79329	1.51317e-56	false	0.612046	0.00160546	up	3.79329	1.51317e-56
LOC114263690	up	2.34939	6.20888e-27	false	0.157587	0.678435	up	2.34939	6.20888e-27
LOC114264316	up	3.45392	4.92697e-290	up	1.26105	8.3919e-22	up	3.45392	4.92697e-290
LOC114263707	up	2.20278	9.61862e-20	false	-0.676812	0.587119	up	2.20278	9.61862e-20
LOC114263708	up	2.11905	3.05393e-42	false	0.360835	0.0865651	up	2.11905	3.05393e-42
LOC114263709	up	2.3515	9.30263e-23	false	0.701832	0.010736	up	2.3515	9.30263e-23
LOC114264378	up	8.03554	1.01797e-10	up	1.20746	0.00273244	up	8.03554	1.01797e-10
LOC114264956	up	8.50292	3.06493e-59	up	3.27886	3.58153e-93	up	8.50292	3.06493e-59
LOC114263723	up	1.48308	6.50902e-54	false	0.268335	0.0608571	up	1.48308	6.50902e-54
LOC114263747	up	3.83251	3.24139e-09	false	0.764361	0.24685	up	3.83251	3.24139e-09
LOC114263789	up	7.37167	1.94663e-08	false	0.460278	0.549859	up	7.37167	1.94663e-08
LOC114264974	up	7.06084	0	up	1.99971	2.84722e-60	up	7.06084	0
LOC114263809	up	2.21511	6.58245e-145	false	0.276858	0.0261459	up	2.21511	6.58245e-145
LOC114263846	up	1.13859	1.38667e-43	false	-0.0861334	0.661773	up	1.13859	1.38667e-43
LOC114263855	up	1.39946	4.54174e-74	false	0.215153	0.244013	up	1.39946	4.54174e-74
LOC114263863	up	7.15644	1.17866e-59	false	0.95954	2.70835e-08	up	7.15644	1.17866e-59
LOC114263864	up	3.52981	0	false	0.52394	2.14138e-05	up	3.52981	0
LOC114263911	up	5.85689	3.79518e-58	false	0.547678	0.0107968	up	5.85689	3.79518e-58
LOC114263933	up	7.37048	0	false	0.538237	0.218417	up	7.37048	0
LOC114263935	up	1.99845	4.77086e-06	false	-0.781725	0.131261	up	1.99845	4.77086e-06
LOC114263951	up	6.71118	6.49745e-245	false	0.641366	4.85988e-07	up	6.71118	6.49745e-245
LOC114265523	up	5.81062	6.92583e-39	up	1.78639	8.93698e-14	up	5.81062	6.92583e-39
LOC114264007	up	1.93937	3.2059e-105	false	0.403271	0.00549288	up	1.93937	3.2059e-105
LOC114264046	up	1.70191	3.43767e-124	false	0.180044	0.340609	up	1.70191	3.43767e-124
LOC114264074	up	1.22932	5.15343e-21	false	-0.120142	0.621967	up	1.22932	5.15343e-21
LOC114265955	up	2.33041	3.4028e-31	up	1.0614	1.36026e-07	up	2.33041	3.4028e-31
LOC114264090	up	3.62203	4.57272e-15	false	0.139845	0.87317	up	3.62203	4.57272e-15
LOC114264110	up	1.78527	1.43841e-23	false	0.332854	0.154994	up	1.78527	1.43841e-23
LOC114264128	up	1.71615	7.65358e-158	false	0.0443491	0.8758	up	1.71615	7.65358e-158
LOC114264135	up	1.39025	1.23682e-82	false	-0.565813	0.0025778	up	1.39025	1.23682e-82
LOC114264161	up	3.21278	2.11918e-09	false	-0.147268	0.816411	up	3.21278	2.11918e-09
LOC114266238	up	4.86611	0	up	1.11667	8.51291e-32	up	4.86611	0
LOC114264190	up	1.28269	1.97017e-08	false	0.273671	0.45886	up	1.28269	1.97017e-08
LOC114264292	up	1.46409	1.20363e-10	false	0.0905011	0.828596	up	1.46409	1.20363e-10
LOC114264304	up	2.75009	8.98701e-17	false	-0.0566811	0.907907	up	2.75009	8.98701e-17
LOC114266253	up	6.01694	0	up	1.23874	1.13115e-26	up	6.01694	0
LOC114264357	up	2.15914	0.000450396	false	-0.0369468	0.972685	up	2.15914	0.000450396
LOC114264367	up	4.40081	2.89334e-46	false	0.526079	0.0444737	up	4.40081	2.89334e-46
LOC114264368	up	6.11538	3.00617e-11	false	0.310952	0.539166	up	6.11538	3.00617e-11
LOC114264369	up	1.68231	2.048e-06	false	-0.504247	0.189189	up	1.68231	2.048e-06
LOC114264371	up	4.24142	1.293e-19	false	0.204351	0.653246	up	4.24142	1.293e-19
LOC114264372	up	2.6045	1.93383e-30	false	0.0194585	0.960927	up	2.6045	1.93383e-30
LOC114264375	up	4.31012	1.49204e-08	false	0.753016	0.257205	up	4.31012	1.49204e-08
LOC114264377	up	4.12738	8.09074e-62	false	0.3573	0.103175	up	4.12738	8.09074e-62
LOC114266681	up	8.43609	7.77468e-12	up	1.417	4.34853e-06	up	8.43609	7.77468e-12
LOC114264390	up	2.83468	3.20085e-176	false	0.900258	1.11599e-11	up	2.83468	3.20085e-176
LOC114264394	up	2.51463	6.38383e-189	false	0.322298	0.00885483	up	2.51463	6.38383e-189
LOC114264416	up	2.26391	5.88166e-12	false	0.201317	0.721338	up	2.26391	5.88166e-12
LOC114264471	up	1.32154	3.79116e-11	false	0.253475	0.423427	up	1.32154	3.79116e-11
LOC114264484	up	1.61049	6.13858e-49	false	0.117346	0.589457	up	1.61049	6.13858e-49
LOC114264500	up	1.6405	2.48213e-157	false	0.185065	0.160771	up	1.6405	2.48213e-157
LOC114264501	up	1.77556	3.02774e-60	false	0.579574	3.75267e-05	up	1.77556	3.02774e-60
LOC114264518	up	2.21671	0.000595895	false	-0.261653	0.75113	up	2.21671	0.000595895
LOC114264521	up	5.56575	1.24688e-65	false	0.11072	0.666701	up	5.56575	1.24688e-65
LOC114264526	up	1.30955	2.29785e-71	false	-0.696429	3.13416e-11	up	1.30955	2.29785e-71
LOC114264580	up	2.78115	2.54952e-203	false	-0.18908	0.310824	up	2.78115	2.54952e-203
LOC114264611	up	1.36766	9.44209e-57	false	-0.418014	0.011304	up	1.36766	9.44209e-57
LOC114264624	up	3.1494	0	false	0.407639	0.00229853	up	3.1494	0
LOC114264632	up	1.48466	9.37666e-41	false	0.339976	0.040305	up	1.48466	9.37666e-41
LOC114264633	up	1.87181	8.06585e-64	false	0.265906	0.0879402	up	1.87181	8.06585e-64
LOC114264644	up	1.03743	2.70085e-07	false	-0.0770422	0.84261	up	1.03743	2.70085e-07
LOC114264646	up	1.53277	1.86959e-230	false	-0.299053	0.0100155	up	1.53277	1.86959e-230
LOC114264653	up	2.53861	0	false	-0.0391364	0.888672	up	2.53861	0
LOC114264712	up	2.81231	6.94591e-158	false	-0.236017	0.265127	up	2.81231	6.94591e-158
LOC114264718	up	1.24489	4.0915e-53	false	-0.190318	0.176773	up	1.24489	4.0915e-53
LOC114264719	up	2.01887	0.00016492	false	-0.387835	0.81802	up	2.01887	0.00016492
LOC114264738	up	2.7689	6.12403e-38	false	0.86769	5.87667e-05	up	2.7689	6.12403e-38
LOC114264746	up	1.60959	2.41791e-11	false	0.0496601	0.911639	up	1.60959	2.41791e-11
LOC114264768	up	2.235	8.61661e-07	false	0.334781	0.585775	up	2.235	8.61661e-07
LOC114264771	up	1.67963	2.48392e-68	false	0.254072	0.0727689	up	1.67963	2.48392e-68
LOC114264776	up	1.41317	0.0022464	false	0.299196	0.682725	up	1.41317	0.0022464
LOC114264779	up	3.03636	4.77476e-190	false	0.458246	0.000258204	up	3.03636	4.77476e-190
LOC114264782	up	1.2112	1.51683e-17	false	-0.615752	2.96931e-05	up	1.2112	1.51683e-17
LOC114264790	up	8.92649	2.33669e-17	false	0.734927	0.000475241	up	8.92649	2.33669e-17
LOC114264791	up	3.30233	1.55323e-192	false	0.334036	0.0210673	up	3.30233	1.55323e-192
LOC114264794	up	4.79029	0	false	0.352746	7.91792e-05	up	4.79029	0
LOC114264845	up	2.75512	7.57158e-09	false	0.481885	0.375886	up	2.75512	7.57158e-09
LOC114264868	up	3.15877	0	false	0.430064	0.000553156	up	3.15877	0
LOC114264869	up	1.48521	3.8505e-48	false	-0.000561817	0.998074	up	1.48521	3.8505e-48
LOC114264872	up	1.98129	0	false	0.389699	0.000182478	up	1.98129	0
LOC114264885	up	6.4266	3.04484e-16	false	0.791619	0.0414241	up	6.4266	3.04484e-16
LOC114264886	up	2.92337	0	false	0.698342	8.29754e-15	up	2.92337	0
LOC114264903	up	4.62915	6.20563e-06	false	-0.268692	0.755865	up	4.62915	6.20563e-06
LOC114266904	up	5.73921	7.93127e-237	up	1.39318	4.73874e-24	up	5.73921	7.93127e-237
LOC114266969	up	2.98462	9.34878e-60	up	1.19427	2.98824e-11	up	2.98462	9.34878e-60
LOC114264976	up	1.57527	0.00418703	false	0.0336041	0.972217	up	1.57527	0.00418703
LOC114265000	up	1.21094	1.14211e-21	false	-0.0779432	0.775368	up	1.21094	1.14211e-21
LOC114265070	up	1.10555	2.48778e-09	false	-0.376212	0.102996	up	1.10555	2.48778e-09
LOC114265073	up	5.67175	0	false	0.424435	0.000521756	up	5.67175	0
LOC114265074	up	3.73375	0	false	0.517301	0.00054319	up	3.73375	0
LOC114265096	up	1.1795	4.60165e-22	false	0.170283	0.458076	up	1.1795	4.60165e-22
LOC114265149	up	2.88861	6.22261e-261	false	-0.0800891	0.679896	up	2.88861	6.22261e-261
LOC114265177	up	1.42533	0.00167659	false	0.150013	0.856651	up	1.42533	0.00167659
LOC114265189	up	4.82741	1.80045e-86	false	0.55741	0.00291813	up	4.82741	1.80045e-86
LOC114265195	up	1.34409	9.38169e-71	false	0.170099	0.203368	up	1.34409	9.38169e-71
LOC114265239	up	2.2749	4.15069e-92	false	0.201674	0.246568	up	2.2749	4.15069e-92
LOC114265269	up	1.22785	1.19627e-11	false	-0.101449	0.780882	up	1.22785	1.19627e-11
LOC114265278	up	1.01295	1.86439e-30	false	-0.348517	0.0121921	up	1.01295	1.86439e-30
LOC114265314	up	1.5576	2.00503e-11	false	0.14049	0.713381	up	1.5576	2.00503e-11
LOC114265354	up	1.86441	0.000183863	false	0.424521	0.555449	up	1.86441	0.000183863
LOC114265356	up	2.01643	1.31407e-35	false	0.913991	8.32335e-07	up	2.01643	1.31407e-35
LOC114265363	up	1.11854	8.5581e-30	false	-0.116659	0.531007	up	1.11854	8.5581e-30
LOC114265374	up	2.26461	3.53363e-114	false	0.179414	0.256533	up	2.26461	3.53363e-114
LOC114265484	up	1.97557	1.72454e-41	false	0.496284	0.00475481	up	1.97557	1.72454e-41
LOC114265506	up	1.18467	5.94025e-57	false	0.129834	0.562391	up	1.18467	5.94025e-57
LOC114265510	up	1.47559	1.76698e-47	false	0.250152	0.196298	up	1.47559	1.76698e-47
LOC114266977	up	3.982	2.86589e-13	up	1.29718	0.00279236	up	3.982	2.86589e-13
LOC114265529	up	1.35022	4.43789e-60	false	0.333963	0.0268417	up	1.35022	4.43789e-60
LOC114265549	up	3.72329	0	false	0.0772394	0.641474	up	3.72329	0
LOC114265632	up	1.37468	2.25927e-41	false	0.0068552	0.978902	up	1.37468	2.25927e-41
LOC114265654	up	1.68186	1.70443e-22	false	0.0666576	0.855073	up	1.68186	1.70443e-22
LOC114265666	up	1.01696	9.21921e-30	false	-0.0996877	0.584135	up	1.01696	9.21921e-30
LOC114265692	up	1.4755	8.26841e-10	false	-0.0595984	0.895542	up	1.4755	8.26841e-10
LOC114265716	up	1.01124	2.54934e-87	false	-0.271865	0.0215509	up	1.01124	2.54934e-87
LOC114265719	up	2.23992	3.92401e-90	false	0.303108	0.0576426	up	2.23992	3.92401e-90
LOC114265861	up	1.09101	1.10477e-56	false	-0.270121	0.110634	up	1.09101	1.10477e-56
LOC114265862	up	1.52976	1.84607e-28	false	0.373929	0.051502	up	1.52976	1.84607e-28
LOC114265876	up	2.2629	1.69287e-68	false	0.02574	0.931571	up	2.2629	1.69287e-68
LOC114265883	up	1.15906	1.15847e-37	false	-0.224603	0.305576	up	1.15906	1.15847e-37
LOC114265888	up	6.5063	4.75597e-77	false	0.679372	4.6683e-05	up	6.5063	4.75597e-77
LOC114265904	up	2.23608	5.09577e-75	false	0.594038	0.000259007	up	2.23608	5.09577e-75
LOC114265906	up	1.16306	1.88894e-31	false	-0.113998	0.563871	up	1.16306	1.88894e-31
LOC114265933	up	1.53955	2.13114e-11	false	0.388955	0.215423	up	1.53955	2.13114e-11
LOC114265952	up	1.65344	1.67334e-175	false	0.100324	0.482322	up	1.65344	1.67334e-175
LOC114267287	up	5.3704	1.0679e-114	up	1.28205	2.23242e-12	up	5.3704	1.0679e-114
LOC114266035	up	1.3319	8.59631e-23	false	0.124258	0.649754	up	1.3319	8.59631e-23
LOC114266053	up	1.34904	6.63964e-08	false	0.206246	0.584254	up	1.34904	6.63964e-08
LOC114266067	up	1.57514	5.10203e-74	false	-0.0600751	0.768796	up	1.57514	5.10203e-74
LOC114266092	up	2.06024	5.74373e-25	false	0.561077	0.0159536	up	2.06024	5.74373e-25
LOC114266108	up	1.73644	1.26812e-221	false	0.223522	0.0498057	up	1.73644	1.26812e-221
LOC114266137	up	1.50123	1.29237e-65	false	0.14125	0.474358	up	1.50123	1.29237e-65
LOC114266141	up	1.17303	8.39312e-24	false	-0.167069	0.481483	up	1.17303	8.39312e-24
LOC114266143	up	1.89494	3.7433e-11	false	-0.505924	0.111921	up	1.89494	3.7433e-11
LOC114266170	up	2.34556	3.25637e-09	false	0.257795	0.636492	up	2.34556	3.25637e-09
LOC114266177	up	3.32849	7.63488e-187	false	0.192601	0.20846	up	3.32849	7.63488e-187
LOC114266233	up	1.42734	2.3298e-43	false	-0.0610512	0.787126	up	1.42734	2.3298e-43
LOC114266234	up	1.73048	1.09083e-11	false	0.253738	0.513901	up	1.73048	1.09083e-11
LOC114267754	up	5.34938	1.28142e-29	up	1.81068	4.63961e-11	up	5.34938	1.28142e-29
LOC114266240	up	1.99543	2.33446e-06	false	0.442346	0.430151	up	1.99543	2.33446e-06
LOC114268049	up	3.9251	2.50262e-24	up	1.48939	7.94985e-07	up	3.9251	2.50262e-24
LOC114266261	up	1.14335	2.32698e-54	false	-0.0436679	0.846578	up	1.14335	2.32698e-54
LOC114266270	up	2.25534	3.88272e-73	false	0.257921	0.157022	up	2.25534	3.88272e-73
LOC114266333	up	2.70919	2.35767e-291	false	0.293835	0.0101785	up	2.70919	2.35767e-291
LOC114266334	up	2.0254	1.1863e-06	false	-0.0772453	0.908457	up	2.0254	1.1863e-06
LOC114266344	up	4.82397	2.10352e-19	false	-0.0053522	0.992992	up	4.82397	2.10352e-19
LOC114266357	up	5.39498	2.56746e-54	false	0.578761	0.00360025	up	5.39498	2.56746e-54
LOC114266363	up	4.15165	6.67837e-146	false	0.800269	2.15977e-09	up	4.15165	6.67837e-146
LOC114266367	up	5.35736	5.02105e-52	false	-0.297531	0.169598	up	5.35736	5.02105e-52
LOC114266369	up	2.01053	8.32157e-93	false	-0.125471	0.47284	up	2.01053	8.32157e-93
LOC114266405	up	1.61054	1.03271e-128	false	0.36407	0.00137248	up	1.61054	1.03271e-128
LOC114266422	up	1.09314	2.45362e-57	false	0.0273083	0.891985	up	1.09314	2.45362e-57
LOC114266427	up	1.83599	1.15886e-108	false	-0.0221436	0.924458	up	1.83599	1.15886e-108
LOC114266435	up	1.35764	6.89493e-39	false	0.336873	0.0224002	up	1.35764	6.89493e-39
LOC114266441	up	3.01531	3.42742e-25	false	0.812682	0.00386386	up	3.01531	3.42742e-25
LOC114266472	up	8.4441	6.28889e-115	false	0.143273	0.626328	up	8.4441	6.28889e-115
LOC114266488	up	8.14969	0	false	0.217726	0.221576	up	8.14969	0
LOC114266498	up	1.67787	1.18989e-49	false	-0.108114	0.659545	up	1.67787	1.18989e-49
LOC114266548	up	2.15687	3.09958e-68	false	0.687631	4.028e-05	up	2.15687	3.09958e-68
LOC114266568	up	2.17636	6.28552e-272	false	0.592027	3.43055e-09	up	2.17636	6.28552e-272
LOC114266616	up	1.44076	1.30285e-17	false	0.0791705	0.832053	up	1.44076	1.30285e-17
LOC114266660	up	2.21829	2.8188e-28	false	0.497206	0.0235852	up	2.21829	2.8188e-28
LOC114266664	up	2.33282	0.00175214	false	-0.901475	0.183544	up	2.33282	0.00175214
LOC114268147	up	3.13812	4.8738e-28	up	1.03992	0.000273284	up	3.13812	4.8738e-28
LOC114266700	up	3.64901	8.35563e-28	false	-0.288019	0.353193	up	3.64901	8.35563e-28
LOC114266724	up	1.17755	1.96114e-17	false	-0.504363	0.000911211	up	1.17755	1.96114e-17
LOC114266766	up	1.53438	4.37958e-26	false	0.535195	0.00268549	up	1.53438	4.37958e-26
LOC114266850	up	1.3635	2.17346e-18	false	-0.722467	4.05389e-06	up	1.3635	2.17346e-18
LOC114266872	up	1.41036	0.000249051	false	-0.331642	0.488029	up	1.41036	0.000249051
LOC114266899	up	1.72684	2.89542e-81	false	0.155905	0.419654	up	1.72684	2.89542e-81
LOC114268825	up	6.20405	2.25442e-77	up	2.14395	1.10751e-38	up	6.20405	2.25442e-77
LOC114266913	up	1.73778	4.24461e-56	false	-0.385694	0.00352569	up	1.73778	4.24461e-56
LOC114266925	up	1.04356	3.90094e-09	false	-0.0718316	0.828733	up	1.04356	3.90094e-09
LOC114266954	up	1.40931	3.95488e-71	false	0.100663	0.59234	up	1.40931	3.95488e-71
LOC114266959	up	2.08417	8.51965e-08	false	-0.223837	0.657756	up	2.08417	8.51965e-08
LOC114266964	up	6.80214	1.59432e-07	false	-0.0413304	0.965117	up	6.80214	1.59432e-07
LOC114268826	up	4.31728	1.47298e-31	up	1.70871	1.65845e-09	up	4.31728	1.47298e-31
LOC114268827	up	6.79224	1.62413e-33	up	2.17188	5.91406e-22	up	6.79224	1.62413e-33
LOC114267038	up	2.87315	3.11805e-96	false	0.218972	0.181796	up	2.87315	3.11805e-96
LOC114267042	up	4.39166	0	false	-0.420703	0.021935	up	4.39166	0
LOC114267072	up	1.41181	2.60874e-09	false	0.0026547	0.99531	up	1.41181	2.60874e-09
LOC114267091	up	1.64652	7.59756e-104	false	0.294046	0.029087	up	1.64652	7.59756e-104
LOC114267104	up	3.02488	4.18531e-288	false	-0.308815	0.0294932	up	3.02488	4.18531e-288
LOC114267138	up	8.50842	7.5754e-16	false	0.952074	1.85692e-05	up	8.50842	7.5754e-16
LOC114267139	up	1.56415	3.0257e-152	false	0.208091	0.0791453	up	1.56415	3.0257e-152
LOC114267199	up	1.17998	0.0271334	false	-0.422735	0.570389	up	1.17998	0.0271334
LOC114267204	up	1.5196	3.74801e-162	false	-0.2658	0.216709	up	1.5196	3.74801e-162
LOC114268828	up	3.16684	4.31906e-48	up	1.07495	1.63951e-07	up	3.16684	4.31906e-48
LOC114267309	up	3.09353	1.10488e-275	false	-0.359476	0.0582922	up	3.09353	1.10488e-275
LOC114267317	up	1.65082	1.53245e-65	false	0.22776	0.227436	up	1.65082	1.53245e-65
LOC114267323	up	1.48579	1.70121e-19	false	0.243786	0.259585	up	1.48579	1.70121e-19
LOC114267326	up	1.92636	1.41437e-49	false	-0.036611	0.896351	up	1.92636	1.41437e-49
LOC114267329	up	1.50757	4.7371e-20	false	0.464553	0.0194671	up	1.50757	4.7371e-20
LOC114267437	up	1.35328	1.10506e-107	false	-0.116788	0.512487	up	1.35328	1.10506e-107
LOC114267500	up	2.13783	2.06243e-126	false	-0.130227	0.526821	up	2.13783	2.06243e-126
LOC114267502	up	1.61037	6.0469e-118	false	-0.439976	0.000363511	up	1.61037	6.0469e-118
LOC114267524	up	1.55427	4.79324e-10	false	0.210551	0.573892	up	1.55427	4.79324e-10
LOC114267563	up	2.35246	0	false	0.749387	7.00767e-07	up	2.35246	0
LOC114267583	up	1.93368	4.83199e-13	false	0.104621	0.820406	up	1.93368	4.83199e-13
LOC114267608	up	7.02176	3.99309e-08	false	-0.0724968	0.91934	up	7.02176	3.99309e-08
LOC114267620	up	1.17237	4.21789e-09	false	0.0251581	0.955243	up	1.17237	4.21789e-09
LOC114267654	up	2.88968	7.29139e-49	false	0.249289	0.331057	up	2.88968	7.29139e-49
LOC114267664	up	1.12794	6.86338e-21	false	-0.0679596	0.7881	up	1.12794	6.86338e-21
LOC114267665	up	1.73295	1.77052e-81	false	0.636744	1.47856e-07	up	1.73295	1.77052e-81
LOC114267677	up	5.53592	1.19912e-16	false	-0.873733	0.00106804	up	5.53592	1.19912e-16
LOC114267701	up	1.84103	1.03171e-99	false	-0.307475	0.02055	up	1.84103	1.03171e-99
LOC114267702	up	1.09902	0.00103121	false	-0.89684	0.00236261	up	1.09902	0.00103121
LOC114267721	up	4.55936	5.61837e-274	false	0.0571682	0.805185	up	4.55936	5.61837e-274
LOC114267740	up	2.53127	0	false	0.338493	0.0672175	up	2.53127	0
LOC114269091	up	7.88384	0	up	1.95664	6.03231e-86	up	7.88384	0
LOC114267758	up	2.18483	7.42724e-11	false	-0.566596	0.0846376	up	2.18483	7.42724e-11
LOC114267790	up	3.63476	5.23255e-121	false	0.960457	1.00821e-11	up	3.63476	5.23255e-121
LOC114267793	up	2.75665	0	false	0.388943	0.000574795	up	2.75665	0
LOC114267794	up	3.30946	0	false	0.575554	4.67727e-08	up	3.30946	0
LOC114267808	up	1.31811	1.37402e-100	false	-0.00806295	0.970388	up	1.31811	1.37402e-100
LOC114267811	up	2.55034	2.45341e-25	false	0.315936	0.257462	up	2.55034	2.45341e-25
LOC114267816	up	1.38843	5.01928e-151	false	-0.0190285	0.914634	up	1.38843	5.01928e-151
LOC114267831	up	1.08018	8.00379e-05	false	0.0184819	0.974954	up	1.08018	8.00379e-05
LOC114267852	up	1.55785	7.8567e-05	false	0.36553	0.538614	up	1.55785	7.8567e-05
LOC114267863	up	1.53146	4.70254e-07	false	-0.841155	0.00165687	up	1.53146	4.70254e-07
LOC114267865	up	1.60024	3.49786e-54	false	-0.0717905	0.723853	up	1.60024	3.49786e-54
LOC114267877	up	2.26109	7.60041e-06	false	0.642538	0.302074	up	2.26109	7.60041e-06
LOC114267928	up	1.32365	3.97501e-05	false	-0.0609419	0.920611	up	1.32365	3.97501e-05
LOC114267930	up	1.57333	2.27499e-153	false	0.245242	0.0933199	up	1.57333	2.27499e-153
LOC114267970	up	5.32427	5.1338e-29	false	0.0304239	0.947858	up	5.32427	5.1338e-29
LOC114267998	up	2.09202	2.87501e-226	false	0.847006	1.56013e-10	up	2.09202	2.87501e-226
LOC114268000	up	1.3546	9.14191e-24	false	-0.315048	0.0558935	up	1.3546	9.14191e-24
LOC114268003	up	2.77899	0	false	-0.0745266	0.757918	up	2.77899	0
LOC114269143	up	4.77943	1.66971e-29	up	2.20127	6.99749e-14	up	4.77943	1.66971e-29
LOC114268076	up	2.54215	2.96559e-109	false	0.476514	0.000662677	up	2.54215	2.96559e-109
LOC114268091	up	2.32565	6.75509e-117	false	0.627995	1.72197e-06	up	2.32565	6.75509e-117
LOC114268115	up	2.14403	2.42095e-50	false	0.0556273	0.857779	up	2.14403	2.42095e-50
LOC114269408	up	6.45617	0	up	1.71736	3.07079e-23	up	6.45617	0
LOC114269423	up	7.58341	0	up	1.11759	0.0130963	up	7.58341	0
LOC114268218	up	2.69006	0	false	0.521607	0.000641488	up	2.69006	0
LOC114268219	up	4.76128	0	false	-0.0579188	0.815835	up	4.76128	0
LOC114268252	up	2.27114	8.43396e-11	false	0.698386	0.0794019	up	2.27114	8.43396e-11
LOC114268254	up	2.17252	1.97521e-06	false	0.77067	0.149733	up	2.17252	1.97521e-06
LOC114268317	up	2.34164	8.43246e-38	false	0.658117	0.00245408	up	2.34164	8.43246e-38
LOC114268333	up	1.91096	0.000886563	false	0.33602	0.690351	up	1.91096	0.000886563
LOC114268357	up	3.76568	3.12841e-238	false	0.578869	0.000167393	up	3.76568	3.12841e-238
LOC114268384	up	1.41547	1.9751e-05	false	0.320525	0.547012	up	1.41547	1.9751e-05
LOC114268395	up	1.86193	1.01612e-57	false	0.550161	0.000104901	up	1.86193	1.01612e-57
LOC114268401	up	1.09113	5.49008e-31	false	-0.71102	2.4574e-09	up	1.09113	5.49008e-31
LOC114268417	up	1.43318	3.91166e-48	false	0.0700878	0.743217	up	1.43318	3.91166e-48
LOC114268452	up	2.13517	3.37905e-15	false	0.241146	0.540802	up	2.13517	3.37905e-15
LOC114268467	up	2.33556	9.58718e-172	false	0.76048	2.9263e-12	up	2.33556	9.58718e-172
LOC114268471	up	2.8534	4.86239e-188	false	0.0352262	0.872636	up	2.8534	4.86239e-188
LOC114268477	up	3.09915	2.03029e-34	false	-0.0782102	0.878871	up	3.09915	2.03029e-34
LOC114268496	up	4.69318	2.24637e-238	false	0.786754	6.52972e-08	up	4.69318	2.24637e-238
LOC114268514	up	1.09941	5.7066e-102	false	-0.0829786	0.554301	up	1.09941	5.7066e-102
LOC114268550	up	3.25385	0	false	0.461272	0.000158344	up	3.25385	0
LOC114268619	up	1.56736	1.14827e-68	false	0.329756	0.011765	up	1.56736	1.14827e-68
LOC114268620	up	2.33948	2.30114e-08	false	-0.02547	0.971704	up	2.33948	2.30114e-08
LOC114268643	up	1.01903	0.0258222	false	-0.0494282	0.955775	up	1.01903	0.0258222
LOC114268700	up	1.66871	1.90117e-151	false	0.026051	0.90025	up	1.66871	1.90117e-151
LOC114268706	up	2.38323	3.76692e-294	false	0.456908	7.20397e-06	up	2.38323	3.76692e-294
LOC114268743	up	1.25373	5.68026e-58	false	-0.654478	3.26106e-09	up	1.25373	5.68026e-58
LOC114268769	up	1.20355	7.54089e-19	false	-0.266107	0.349378	up	1.20355	7.54089e-19
LOC114268771	up	1.67913	3.72244e-15	false	-0.138443	0.685922	up	1.67913	3.72244e-15
LOC114268791	up	1.5517	8.71214e-39	false	0.0127987	0.967469	up	1.5517	8.71214e-39
LOC114268795	up	1.34953	1.05215e-13	false	0.318615	0.315302	up	1.34953	1.05215e-13
LOC114269424	up	7.70354	1.72408e-82	up	1.07508	0.019633	up	7.70354	1.72408e-82
LOC114269604	up	5.69837	3.18246e-51	up	1.01122	1.73603e-07	up	5.69837	3.18246e-51
LOC114270230	up	2.65654	3.14296e-78	up	1.16894	3.49721e-14	up	2.65654	3.14296e-78
LOC114270317	up	4.75495	5.04472e-272	up	1.97218	5.88436e-59	up	4.75495	5.04472e-272
LOC114268861	up	1.65568	1.48466e-102	false	0.506314	0.00267853	up	1.65568	1.48466e-102
LOC114268972	up	1.76482	2.59196e-06	false	0.316578	0.596922	up	1.76482	2.59196e-06
LOC114269005	up	3.25372	0	false	0.438964	0.00865346	up	3.25372	0
LOC114269006	up	1.5483	8.50895e-78	false	0.310332	0.0150504	up	1.5483	8.50895e-78
LOC114269025	up	2.1082	4.27001e-40	false	0.892815	1.28242e-07	up	2.1082	4.27001e-40
LOC114269030	up	4.49538	0	false	0.895461	1.60743e-15	up	4.49538	0
LOC114269036	up	2.10216	6.3056e-36	false	0.187033	0.557223	up	2.10216	6.3056e-36
LOC114269065	up	2.07492	5.51517e-32	false	0.379216	0.0902364	up	2.07492	5.51517e-32
LOC114269072	up	3.37962	1.79797e-92	false	0.286788	0.158623	up	3.37962	1.79797e-92
LOC114269080	up	5.72548	0	false	0.86882	3.5031e-20	up	5.72548	0
LOC114270359	up	2.69985	2.73482e-17	up	1.07212	0.000739399	up	2.69985	2.73482e-17
LOC114269122	up	3.66618	6.88407e-90	false	0.206692	0.372504	up	3.66618	6.88407e-90
LOC114270515	up	3.87778	2.48193e-82	up	2.76068	3.24919e-38	up	3.87778	2.48193e-82
LOC114269161	up	3.79196	0	false	0.670995	1.22222e-11	up	3.79196	0
LOC114269203	up	1.30476	3.05912e-99	false	0.237491	0.0370654	up	1.30476	3.05912e-99
LOC114269207	up	2.10707	1.91842e-98	false	0.0873043	0.685433	up	2.10707	1.91842e-98
LOC114269220	up	1.65391	0.00665032	false	0.222847	0.828145	up	1.65391	0.00665032
LOC114269227	up	1.31906	4.18469e-33	false	0.0788037	0.767439	up	1.31906	4.18469e-33
LOC114269232	up	1.03363	1.63394e-50	false	-0.0863832	0.654634	up	1.03363	1.63394e-50
LOC114269234	up	1.5797	1.7858e-33	false	0.442346	0.0075718	up	1.5797	1.7858e-33
LOC114269279	up	1.46199	1.41023e-125	false	0.443713	8.17089e-06	up	1.46199	1.41023e-125
LOC114269285	up	1.58908	2.07501e-09	false	0.383197	0.271441	up	1.58908	2.07501e-09
LOC114269322	up	1.44805	6.23127e-98	false	-0.0570565	0.856076	up	1.44805	6.23127e-98
LOC114269334	up	2.25624	1.68418e-166	false	-0.392142	0.000315804	up	2.25624	1.68418e-166
LOC114269346	up	1.88376	4.18452e-16	false	-0.694508	0.00102268	up	1.88376	4.18452e-16
LOC114269347	up	2.81973	5.07495e-204	false	0.257947	0.0859741	up	2.81973	5.07495e-204
LOC114269351	up	1.39421	0.000958517	false	0.385418	0.549485	up	1.39421	0.000958517
LOC114269373	up	2.86094	1.61421e-20	false	-0.244979	0.545211	up	2.86094	1.61421e-20
LOC114269397	up	3.87271	0	false	-0.429059	1.16989e-05	up	3.87271	0
LOC114271750	up	7.05007	0	up	1.39997	1.10358e-15	up	7.05007	0
LOC114271753	up	7.21124	0	up	1.91618	3.58153e-93	up	7.21124	0
LOC114271952	up	3.58318	0	up	1.11737	1.32773e-28	up	3.58318	0
LOC114269425	up	1.18622	5.79107e-50	false	0.125134	0.442903	up	1.18622	5.79107e-50
LOC114269428	up	1.95325	7.6914e-233	false	0.464687	2.0664e-05	up	1.95325	7.6914e-233
LOC114269433	up	5.87159	0	false	0.375503	0.000146659	up	5.87159	0
LOC114269458	up	8.68196	1.85193e-16	false	0.731248	0.00116553	up	8.68196	1.85193e-16
LOC114269459	up	7.97437	5.81688e-10	false	0.766556	0.200676	up	7.97437	5.81688e-10
LOC114269473	up	1.17028	1.70961e-17	false	-0.21225	0.314512	up	1.17028	1.70961e-17
LOC114269485	up	3.09402	1.20874e-16	false	0.607617	0.0776961	up	3.09402	1.20874e-16
LOC114269489	up	3.0241	0	false	0.475003	2.09004e-05	up	3.0241	0
LOC114269493	up	3.22211	2.31797e-20	false	0.438612	0.224274	up	3.22211	2.31797e-20
LOC114269524	up	1.1593	0.0362031	false	-0.122574	0.913062	up	1.1593	0.0362031
LOC114269551	up	2.06096	2.02749e-19	false	0.339114	0.27705	up	2.06096	2.02749e-19
LOC114273211	up	7.60852	1.43927e-09	up	1.44725	0.00128465	up	7.60852	1.43927e-09
LOC114269655	up	2.16019	0	false	-0.315056	0.122852	up	2.16019	0
LOC114269705	up	2.49193	1.89034e-235	false	0.380589	0.000799727	up	2.49193	1.89034e-235
LOC114269709	up	1.07332	1.94296e-08	false	0.0624465	0.878375	up	1.07332	1.94296e-08
LOC114269735	up	7.61089	5.69907e-58	false	0.297006	0.0617412	up	7.61089	5.69907e-58
LOC114269737	up	3.62538	1.60527e-245	false	-0.101171	0.622014	up	3.62538	1.60527e-245
LOC114269738	up	4.01849	9.43294e-212	false	-0.143267	0.480858	up	4.01849	9.43294e-212
LOC114269741	up	3.9846	6.27135e-142	false	0.402623	0.00939009	up	3.9846	6.27135e-142
LOC114269743	up	3.53761	3.60945e-44	false	0.275847	0.312015	up	3.53761	3.60945e-44
LOC114269781	up	3.28197	1.67364e-275	false	0.154587	0.307326	up	3.28197	1.67364e-275
LOC114269865	up	1.50927	6.8601e-81	false	0.391544	0.00159915	up	1.50927	6.8601e-81
LOC114269866	up	2.5248	6.5672e-24	false	-0.164791	0.615236	up	2.5248	6.5672e-24
LOC114269879	up	1.6763	1.77445e-07	false	0.420902	0.359046	up	1.6763	1.77445e-07
LOC114269880	up	1.34569	5.16952e-61	false	-0.405944	0.0674789	up	1.34569	5.16952e-61
LOC114269912	up	3.88394	2.20207e-12	false	0.56076	0.349548	up	3.88394	2.20207e-12
LOC114269919	up	2.06636	1.48211e-120	false	0.510105	3.1998e-05	up	2.06636	1.48211e-120
LOC114269923	up	1.82747	4.07693e-86	false	0.229737	0.111853	up	1.82747	4.07693e-86
LOC114269928	up	4.50281	7.07044e-28	false	0.295579	0.400679	up	4.50281	7.07044e-28
LOC114269933	up	1.29113	0.00127349	false	0.130215	0.86289	up	1.29113	0.00127349
LOC114269960	up	1.31747	1.85674e-46	false	0.257729	0.0797191	up	1.31747	1.85674e-46
LOC114269964	up	3.21104	1.63407e-202	false	0.831228	8.48924e-12	up	3.21104	1.63407e-202
LOC114269981	up	1.08491	1.89062e-34	false	0.0718135	0.76668	up	1.08491	1.89062e-34
LOC114270074	up	1.7441	1.97656e-66	false	0.0681835	0.745649	up	1.7441	1.97656e-66
LOC114270075	up	1.7258	1.16938e-20	false	0.319743	0.184269	up	1.7258	1.16938e-20
LOC114270148	up	1.8466	3.04115e-40	false	0.142881	0.595948	up	1.8466	3.04115e-40
LOC114270154	up	1.49364	5.79062e-69	false	0.303894	0.0302808	up	1.49364	5.79062e-69
LOC114270159	up	5.59964	1.54889e-93	false	0.579174	0.00651754	up	5.59964	1.54889e-93
LOC114270160	up	4.41094	3.79323e-24	false	0.092778	0.844909	up	4.41094	3.79323e-24
LOC114270162	up	2.41038	7.20726e-43	false	0.5711	0.0219183	up	2.41038	7.20726e-43
LOC114273413	up	2.32737	1.42354e-99	up	1.21443	1.82179e-13	up	2.32737	1.42354e-99
LOC114270264	up	1.14985	1.0973e-58	false	0.10127	0.535081	up	1.14985	1.0973e-58
LOC114270282	up	3.59731	3.76519e-240	false	0.736742	4.47517e-10	up	3.59731	3.76519e-240
LOC114274235	up	4.94997	9.94944e-116	up	1.73092	0.00102016	up	4.94997	9.94944e-116
LOC114270319	up	1.57614	9.17345e-63	false	0.098821	0.661487	up	1.57614	9.17345e-63
LOC114270326	up	1.18878	4.36393e-55	false	-0.204328	0.399335	up	1.18878	4.36393e-55
LOC114270331	up	1.81704	4.5529e-75	false	-0.0561673	0.803888	up	1.81704	4.5529e-75
LOC114270340	up	1.60687	1.94228e-95	false	0.537934	2.52481e-06	up	1.60687	1.94228e-95
LOC114270352	up	3.50644	5.46501e-29	false	0.568303	0.0390184	up	3.50644	5.46501e-29
LOC114274857	up	4.1063	8.46756e-116	up	1.36165	2.15222e-12	up	4.1063	8.46756e-116
LOC114270386	up	1.5737	3.52027e-77	false	0.114696	0.487243	up	1.5737	3.52027e-77
LOC114270398	up	1.65605	4.0095e-51	false	-0.120199	0.625092	up	1.65605	4.0095e-51
LOC114270404	up	2.56124	5.36371e-35	false	-0.1974	0.477559	up	2.56124	5.36371e-35
LOC114270422	up	1.21072	0.00128044	false	-0.441904	0.381741	up	1.21072	0.00128044
LOC114270431	up	3.54609	5.60381e-305	false	0.731117	9.41432e-09	up	3.54609	5.60381e-305
LOC114270446	up	1.99962	8.19957e-93	false	0.287539	0.0477219	up	1.99962	8.19957e-93
LOC114270466	up	1.94055	2.00458e-224	false	0.108843	0.56307	up	1.94055	2.00458e-224
LOC114270504	up	3.86679	2.75272e-152	false	0.47831	0.00102886	up	3.86679	2.75272e-152
LOC114275063	up	7.49856	1.46759e-17	up	2.15334	2.11813e-13	up	7.49856	1.46759e-17
LOC114270577	up	1.8517	2.89372e-05	false	0.31362	0.657899	up	1.8517	2.89372e-05
LOC114270619	up	1.66637	1.05904e-109	false	0.0464915	0.829427	up	1.66637	1.05904e-109
LOC114270623	up	1.11853	5.78247e-20	false	-0.494956	0.000388245	up	1.11853	5.78247e-20
LOC114270638	up	1.30801	2.82965e-90	false	-0.0381755	0.847186	up	1.30801	2.82965e-90
LOC114270642	up	1.00398	3.45089e-41	false	-0.0749718	0.730822	up	1.00398	3.45089e-41
LOC114270667	up	1.12542	1.65397e-43	false	-0.000852508	0.996511	up	1.12542	1.65397e-43
LOC114270677	up	8.96303	2.42846e-130	false	0.916673	2.13771e-18	up	8.96303	2.42846e-130
LOC114270679	up	1.20425	2.5614e-46	false	-0.282201	0.0543013	up	1.20425	2.5614e-46
LOC114270733	up	5.6314	0	false	0.967256	9.8236e-21	up	5.6314	0
LOC114270744	up	2.22433	1.40435e-241	false	0.158531	0.205041	up	2.22433	1.40435e-241
LOC114270752	up	2.39983	0	false	-0.0626077	0.733469	up	2.39983	0
LOC114270756	up	1.89839	8.60301e-133	false	0.237711	0.0687078	up	1.89839	8.60301e-133
LOC114270763	up	1.18496	0.000432033	false	-0.627376	0.0616899	up	1.18496	0.000432033
LOC114270791	up	1.88269	5.68241e-05	false	0.12681	0.87235	up	1.88269	5.68241e-05
LOC114270814	up	3.84688	5.60986e-34	false	0.142207	0.690351	up	3.84688	5.60986e-34
LOC114270827	up	2.03652	1.25288e-143	false	-0.495512	2.3929e-06	up	2.03652	1.25288e-143
LOC114270834	up	2.47581	7.1607e-196	false	-0.208071	0.191562	up	2.47581	7.1607e-196
LOC114270935	up	1.79765	8.36572e-33	false	0.223408	0.330707	up	1.79765	8.36572e-33
LOC114270936	up	1.37032	6.31882e-139	false	0.24738	0.119304	up	1.37032	6.31882e-139
LOC114270937	up	2.15045	5.90975e-178	false	-0.449336	0.0193073	up	2.15045	5.90975e-178
LOC114271001	up	1.91916	3.64e-201	false	0.526791	1.78213e-06	up	1.91916	3.64e-201
LOC114271003	up	2.00175	2.50513e-58	false	0.377253	0.0148856	up	2.00175	2.50513e-58
LOC114271007	up	2.34446	1.16544e-294	false	0.291437	0.00581897	up	2.34446	1.16544e-294
LOC114275522	up	3.67183	4.84109e-153	up	1.91798	6.67205e-46	up	3.67183	4.84109e-153
LOC114271107	up	3.2196	7.37566e-35	false	0.124486	0.724205	up	3.2196	7.37566e-35
LOC114271119	up	5.79994	0	false	0.867294	1.05623e-13	up	5.79994	0
LOC114271120	up	1.81154	4.41085e-156	false	-0.0493418	0.778484	up	1.81154	4.41085e-156
LOC114271123	up	1.41588	2.20716e-25	false	-0.380914	0.0393201	up	1.41588	2.20716e-25
LOC114271124	up	1.07244	1.10885e-41	false	-0.553568	5.2464e-05	up	1.07244	1.10885e-41
LOC114271147	up	1.12605	2.21816e-10	false	0.0719243	0.827997	up	1.12605	2.21816e-10
LOC114271154	up	1.65444	0.0184394	false	0.158655	0.897778	up	1.65444	0.0184394
LOC114271155	up	1.7574	0.0029679	false	-0.151201	0.867711	up	1.7574	0.0029679
LOC114271214	up	1.9536	9.72256e-40	false	0.387765	0.0316667	up	1.9536	9.72256e-40
LOC114271222	up	1.20242	0.0312009	false	0.0230841	0.982516	up	1.20242	0.0312009
LOC114271234	up	1.32498	1.14746e-30	false	-0.17185	0.366371	up	1.32498	1.14746e-30
LOC114271278	up	2.64441	3.80994e-290	false	0.535351	6.44637e-06	up	2.64441	3.80994e-290
LOC114271279	up	2.05283	3.9583e-61	false	0.198703	0.269339	up	2.05283	3.9583e-61
LOC114271280	up	1.06316	1.21594e-14	false	0.0414812	0.891985	up	1.06316	1.21594e-14
LOC114271281	up	1.96816	1.2051e-11	false	0.164198	0.69972	up	1.96816	1.2051e-11
LOC114271325	up	1.47462	2.38433e-85	false	0.0703477	0.707923	up	1.47462	2.38433e-85
LOC114271335	up	2.87811	1.23839e-38	false	0.782145	0.00133084	up	2.87811	1.23839e-38
LOC114271349	up	3.40715	0	false	0.630398	2.67981e-11	up	3.40715	0
LOC114271362	up	1.47897	1.50555e-29	false	0.26561	0.167336	up	1.47897	1.50555e-29
LOC114271365	up	1.19305	6.02676e-85	false	0.0344199	0.848044	up	1.19305	6.02676e-85
LOC114271376	up	3.36688	2.05321e-05	false	-0.528734	0.481561	up	3.36688	2.05321e-05
LOC114271397	up	1.19843	0.000455355	false	-0.249275	0.626264	up	1.19843	0.000455355
LOC114271402	up	2.64961	3.39481e-181	false	0.653767	3.43055e-09	up	2.64961	3.39481e-181
LOC114271438	up	2.50916	2.94039e-27	false	0.392511	0.162287	up	2.50916	2.94039e-27
LOC114271468	up	2.09648	6.30781e-64	false	0.466709	0.0578537	up	2.09648	6.30781e-64
LOC114271469	up	1.95607	2.67915e-137	false	0.23949	0.259766	up	1.95607	2.67915e-137
LOC114271505	up	1.4134	9.75751e-60	false	-0.267941	0.0603118	up	1.4134	9.75751e-60
LOC114271578	up	1.92193	5.81079e-142	false	0.601797	3.34396e-06	up	1.92193	5.81079e-142
LOC114271581	up	1.6097	3.56249e-49	false	0.225993	0.196062	up	1.6097	3.56249e-49
LOC114271583	up	3.31559	4.94432e-261	false	0.0964816	0.571357	up	3.31559	4.94432e-261
LOC114271586	up	2.88479	0	false	0.32861	0.00131975	up	2.88479	0
LOC114271628	up	1.08243	8.50316e-66	false	0.0858354	0.572057	up	1.08243	8.50316e-66
LOC114271645	up	2.01722	9.61227e-31	false	0.557953	0.00575766	up	2.01722	9.61227e-31
LOC114271655	up	2.49326	2.74521e-24	false	0.439223	0.118168	up	2.49326	2.74521e-24
LOC114271682	up	1.79867	6.88616e-49	false	0.219048	0.359354	up	1.79867	6.88616e-49
LOC114271684	up	3.25764	0	false	0.72842	3.71386e-13	up	3.25764	0
LOC114271692	up	1.0058	1.11195e-84	false	-0.12547	0.339509	up	1.0058	1.11195e-84
LOC114271701	up	2.02948	1.07049e-95	false	0.288931	0.0255772	up	2.02948	1.07049e-95
LOC114271748	up	1.4777	1.04094e-34	false	0.319236	0.0846207	up	1.4777	1.04094e-34
LOC114275528	up	4.44547	1.89479e-303	up	1.03935	5.40402e-12	up	4.44547	1.89479e-303
LOC114275913	up	13.2061	2.73167e-28	up	4.68773	1.31533e-186	up	13.2061	2.73167e-28
LOC114271756	up	1.43229	1.11648e-92	false	0.0807187	0.623011	up	1.43229	1.11648e-92
LOC114271844	up	2.36023	9.33803e-62	false	0.50639	0.00128517	up	2.36023	9.33803e-62
LOC114271846	up	1.31907	3.921e-130	false	-0.262647	0.0358953	up	1.31907	3.921e-130
LOC114275955	up	10.8944	0	up	1.94713	2.51098e-125	up	10.8944	0
LOC114271898	up	1.48853	0.00745658	false	-0.520079	0.424907	up	1.48853	0.00745658
LOC114271934	up	1.90708	2.91766e-69	false	0.643356	2.04677e-06	up	1.90708	2.91766e-69
LOC114276255	up	6.82764	3.31254e-80	up	1.3425	5.42399e-22	up	6.82764	3.31254e-80
LOC114271953	up	1.9268	1.85008e-107	false	-0.68719	1.56573e-05	up	1.9268	1.85008e-107
LOC114271971	up	7.78981	1.43931e-09	false	0.220803	0.775196	up	7.78981	1.43931e-09
LOC114272101	up	1.5729	4.00995e-31	false	0.284628	0.137476	up	1.5729	4.00995e-31
LOC114272121	up	3.43195	0	false	-0.150521	0.398603	up	3.43195	0
LOC114272125	up	1.09477	0.0018377	false	-0.22823	0.679271	up	1.09477	0.0018377
LOC114272155	up	1.62169	2.08246e-70	false	0.438225	0.000935037	up	1.62169	2.08246e-70
LOC114272157	up	1.2393	8.63255e-39	false	-0.180408	0.387903	up	1.2393	8.63255e-39
LOC114272191	up	1.31751	1.28963e-06	false	0.273969	0.493369	up	1.31751	1.28963e-06
LOC114272305	up	1.36287	1.85723e-08	false	-0.0382516	0.938733	up	1.36287	1.85723e-08
LOC114272384	up	2.49026	1.07297e-298	false	0.265719	0.134078	up	2.49026	1.07297e-298
LOC114272419	up	1.09932	1.68093e-33	false	-0.0806256	0.709972	up	1.09932	1.68093e-33
LOC114272424	up	1.15651	1.50419e-55	false	0.155592	0.334332	up	1.15651	1.50419e-55
LOC114272451	up	2.31851	1.11899e-48	false	0.673816	0.00066687	up	2.31851	1.11899e-48
LOC114272452	up	1.97584	8.13868e-169	false	0.368407	0.0029999	up	1.97584	8.13868e-169
LOC114272468	up	1.44584	8.54509e-137	false	-0.193637	0.0913465	up	1.44584	8.54509e-137
LOC114272477	up	2.0658	1.1342e-145	false	0.054784	0.757878	up	2.0658	1.1342e-145
LOC114272478	up	1.86404	2.41016e-13	false	0.117329	0.784435	up	1.86404	2.41016e-13
LOC114272497	up	2.41322	0	false	-0.858784	7.33008e-08	up	2.41322	0
LOC114272522	up	2.96388	5.25479e-175	false	0.743801	1.92913e-07	up	2.96388	5.25479e-175
LOC114272530	up	3.94523	4.22989e-179	false	0.906344	1.78207e-07	up	3.94523	4.22989e-179
LOC114272532	up	2.40366	0	false	-0.162571	0.446552	up	2.40366	0
LOC114272574	up	1.71874	1.45792e-11	false	-0.0931939	0.828601	up	1.71874	1.45792e-11
LOC114272597	up	1.34504	0.010139	false	-0.30667	0.333842	up	1.34504	0.010139
LOC114272685	up	1.26472	2.7826e-13	false	0.198092	0.47291	up	1.26472	2.7826e-13
LOC114272707	up	2.25274	2.57972e-158	false	0.154752	0.315067	up	2.25274	2.57972e-158
LOC114272710	up	2.94614	0	false	0.61625	2.87677e-11	up	2.94614	0
LOC114272822	up	3.35408	5.27037e-167	false	0.0533204	0.890136	up	3.35408	5.27037e-167
LOC114272851	up	3.42128	3.55587e-281	false	0.143137	0.361706	up	3.42128	3.55587e-281
LOC114272938	up	3.1223	1.09282e-99	false	-0.158279	0.416185	up	3.1223	1.09282e-99
LOC114272945	up	1.88023	3.39638e-10	false	0.791025	0.0204961	up	1.88023	3.39638e-10
LOC114272975	up	2.66009	4.19811e-73	false	0.895006	1.00172e-08	up	2.66009	4.19811e-73
LOC114273033	up	2.83423	7.68245e-29	false	0.901199	0.00040787	up	2.83423	7.68245e-29
LOC114273047	up	4.38192	2.72948e-17	false	0.518868	0.223824	up	4.38192	2.72948e-17
LOC114273055	up	2.1759	1.4096e-193	false	0.120916	0.415474	up	2.1759	1.4096e-193
LOC114273069	up	3.81389	2.7009e-206	false	0.196194	0.429302	up	3.81389	2.7009e-206
LOC114273091	up	4.07968	7.59487e-16	false	0.594253	0.166217	up	4.07968	7.59487e-16
LOC114273157	up	1.3609	3.49716e-13	false	0.0619895	0.870272	up	1.3609	3.49716e-13
LOC114273203	up	1.67742	4.16336e-05	false	0.405662	0.470331	up	1.67742	4.16336e-05
LOC114273208	up	1.05977	8.76912e-56	false	0.0224674	0.919777	up	1.05977	8.76912e-56
LOC114276601	up	8.11684	2.31997e-14	up	1.77609	9.56627e-11	up	8.11684	2.31997e-14
LOC114273226	up	7.35147	0	false	0.31781	0.00636562	up	7.35147	0
LOC114273228	up	2.93971	9.69656e-05	false	-0.402147	0.613457	up	2.93971	9.69656e-05
LOC114273231	up	6.64932	4.61574e-280	false	0.700611	5.26817e-09	up	6.64932	4.61574e-280
LOC114273241	up	1.77554	1.82129e-174	false	0.199766	0.18862	up	1.77554	1.82129e-174
LOC114273315	up	2.10759	1.14412e-05	false	-0.257698	0.690487	up	2.10759	1.14412e-05
LOC114273323	up	1.58092	0.000210653	false	-0.0774932	0.923818	up	1.58092	0.000210653
LOC114273376	up	1.84704	4.50444e-63	false	-0.175798	0.326246	up	1.84704	4.50444e-63
LOC114273390	up	1.13022	1.71653e-07	false	0.114119	0.786538	up	1.13022	1.71653e-07
LOC114273399	up	4.39413	4.24529e-248	false	0.396344	0.00249725	up	4.39413	4.24529e-248
LOC114276625	up	3.0003	4.17485e-46	up	1.16277	3.31173e-09	up	3.0003	4.17485e-46
LOC114273419	up	3.03273	0	false	0.670096	3.25848e-12	up	3.03273	0
LOC114273420	up	3.20078	3.48772e-14	false	0.914939	0.0203241	up	3.20078	3.48772e-14
LOC114273440	up	1.77356	4.19447e-182	false	0.478171	1.35565e-06	up	1.77356	4.19447e-182
LOC114273461	up	1.62466	0.000267309	false	0.363726	0.628402	up	1.62466	0.000267309
LOC114273469	up	1.53604	1.24371e-06	false	0.5068	0.310963	up	1.53604	1.24371e-06
LOC114273503	up	3.90494	1.57008e-177	false	0.421413	0.00184184	up	3.90494	1.57008e-177
LOC114273523	up	10.7938	3.34074e-19	false	0.621064	2.49099e-05	up	10.7938	3.34074e-19
LOC114273531	up	1.22289	1.22647e-59	false	0.125825	0.415113	up	1.22289	1.22647e-59
LOC114273533	up	1.19757	2.00069e-31	false	0.19797	0.256076	up	1.19757	2.00069e-31
LOC114273549	up	3.80721	1.57222e-21	false	0.264302	0.51358	up	3.80721	1.57222e-21
LOC114273555	up	1.50391	5.06247e-51	false	0.191305	0.31383	up	1.50391	5.06247e-51
LOC114273556	up	2.58537	2.55627e-87	false	-0.747036	0.000103925	up	2.58537	2.55627e-87
LOC114273557	up	1.05913	1.29995e-60	false	-0.109866	0.478055	up	1.05913	1.29995e-60
LOC114273636	up	5.98296	4.37985e-228	false	0.481153	6.15663e-05	up	5.98296	4.37985e-228
LOC114273637	up	5.79765	3.20322e-42	false	0.398362	0.107058	up	5.79765	3.20322e-42
LOC114273717	up	1.61196	9.57715e-152	false	0.263034	0.0853777	up	1.61196	9.57715e-152
LOC114273733	up	1.01163	1.50974e-26	false	0.0111258	0.966234	up	1.01163	1.50974e-26
LOC114273759	up	1.72868	9.54735e-24	false	-0.0538168	0.891689	up	1.72868	9.54735e-24
LOC114273790	up	1.16808	1.60267e-34	false	-0.474869	0.0445232	up	1.16808	1.60267e-34
LOC114273851	up	3.96541	4.22085e-14	false	-0.0799348	0.910261	up	3.96541	4.22085e-14
LOC114273854	up	3.42239	9.00304e-11	false	0.142526	0.849006	up	3.42239	9.00304e-11
LOC114273858	up	2.07556	1.00148e-101	false	0.534855	0.000445401	up	2.07556	1.00148e-101
LOC114273878	up	5.89788	3.0199e-13	false	0.363761	0.459178	up	5.89788	3.0199e-13
LOC114273909	up	1.83126	8.88718e-32	false	0.250337	0.346257	up	1.83126	8.88718e-32
LOC114273991	up	1.59773	1.44026e-17	false	-0.368437	0.0856899	up	1.59773	1.44026e-17
LOC114274020	up	5.18622	0	false	0.761012	7.5308e-09	up	5.18622	0
LOC114274030	up	1.15275	0.0124528	false	-0.256097	0.750699	up	1.15275	0.0124528
LOC114274033	up	3.81484	1.42307e-208	false	0.748234	1.03502e-07	up	3.81484	1.42307e-208
LOC114274039	up	2.0731	9.9795e-08	false	0.596719	0.223363	up	2.0731	9.9795e-08
LOC114274059	up	1.14638	6.34027e-15	false	0.0102883	0.97933	up	1.14638	6.34027e-15
LOC114274064	up	1.09432	1.30239e-07	false	0.0792035	0.854375	up	1.09432	1.30239e-07
LOC114274119	up	1.1779	1.10371e-77	false	-0.0220847	0.910679	up	1.1779	1.10371e-77
LOC114274148	up	2.74435	3.47719e-12	false	0.0818932	0.887391	up	2.74435	3.47719e-12
LOC114274149	up	4.16716	3.894e-66	false	0.470714	0.0125571	up	4.16716	3.894e-66
LOC114276878	up	3.15201	1.58562e-61	up	1.64439	4.70806e-19	up	3.15201	1.58562e-61
LOC114274274	up	3.13442	0	false	-0.0269016	0.890255	up	3.13442	0
LOC114274314	up	1.22121	3.89407e-61	false	0.163689	0.40909	up	1.22121	3.89407e-61
LOC114274330	up	2.8625	4.13417e-44	false	0.352403	0.112232	up	2.8625	4.13417e-44
LOC114274339	up	2.43306	3.57098e-216	false	-0.160489	0.293717	up	2.43306	3.57098e-216
LOC114274340	up	2.08316	7.11029e-30	false	0.131858	0.713285	up	2.08316	7.11029e-30
LOC114274349	up	4.80155	3.84248e-165	false	0.639421	4.74644e-06	up	4.80155	3.84248e-165
LOC114274357	up	3.73051	1.73311e-15	false	0.465868	0.293891	up	3.73051	1.73311e-15
LOC114274363	up	2.93406	1.94802e-53	false	0.599104	0.0123268	up	2.93406	1.94802e-53
LOC114274414	up	4.18134	2.35416e-114	false	0.819378	2.90195e-07	up	4.18134	2.35416e-114
LOC114274453	up	1.45305	2.05087e-43	false	0.305975	0.0569629	up	1.45305	2.05087e-43
LOC114274459	up	2.50015	4.21981e-212	false	0.564156	1.43915e-07	up	2.50015	4.21981e-212
LOC114274575	up	1.46982	1.39038e-143	false	0.27438	0.00798935	up	1.46982	1.39038e-143
LOC114274593	up	8.86092	9.51371e-13	false	-0.68212	0.0280226	up	8.86092	9.51371e-13
LOC114274604	up	1.52404	4.33811e-70	false	0.214117	0.145071	up	1.52404	4.33811e-70
LOC114274699	up	1.29591	8.293e-27	false	-0.065551	0.788902	up	1.29591	8.293e-27
LOC114274705	up	4.79857	1.13076e-11	false	0.544527	0.31928	up	4.79857	1.13076e-11
LOC114274721	up	4.32579	3.98555e-10	false	0.291365	0.688902	up	4.32579	3.98555e-10
LOC114274722	up	4.14766	2.26911e-13	false	-0.349722	0.435434	up	4.14766	2.26911e-13
LOC114274783	up	1.18305	1.09772e-52	false	0.19037	0.202734	up	1.18305	1.09772e-52
LOC114274817	up	1.13442	5.14015e-07	false	-0.239129	0.594138	up	1.13442	5.14015e-07
LOC114274818	up	1.90823	9.6928e-29	false	0.114373	0.701447	up	1.90823	9.6928e-29
LOC114274825	up	1.53198	9.05118e-81	false	0.0483338	0.809505	up	1.53198	9.05118e-81
LOC114277033	up	11.4962	1.56242e-28	up	2.24083	5.92113e-62	up	11.4962	1.56242e-28
LOC114274912	up	1.05613	1.76818e-09	false	-0.0498651	0.895812	up	1.05613	1.76818e-09
LOC114274914	up	1.92963	2.06401e-105	false	0.0274258	0.916065	up	1.92963	2.06401e-105
LOC114274922	up	1.59406	8.16893e-147	false	0.325399	0.00253958	up	1.59406	8.16893e-147
LOC114274923	up	1.05779	8.48952e-12	false	0.0205147	0.95025	up	1.05779	8.48952e-12
LOC114274950	up	5.57475	6.90884e-12	false	0.281789	0.595448	up	5.57475	6.90884e-12
LOC114275007	up	2.91197	2.23326e-24	false	-0.262983	0.466061	up	2.91197	2.23326e-24
LOC114275008	up	1.51431	0.000301059	false	0.376527	0.590207	up	1.51431	0.000301059
LOC114275011	up	1.17859	2.20344e-72	false	-0.0704961	0.701987	up	1.17859	2.20344e-72
LOC114275019	up	1.78025	7.55525e-100	false	0.0220401	0.921406	up	1.78025	7.55525e-100
LOC114275020	up	1.00467	3.909e-32	false	-0.239859	0.162924	up	1.00467	3.909e-32
LOC114275027	up	1.41515	4.76489e-28	false	-0.422295	0.00860252	up	1.41515	4.76489e-28
LOC114275042	up	1.13435	2.83945e-82	false	-0.0539396	0.75113	up	1.13435	2.83945e-82
LOC114277260	up	2.03777	1.64852e-122	up	1.00137	3.49064e-12	up	2.03777	1.64852e-122
LOC114275107	up	1.91494	8.05214e-264	false	0.202346	0.222826	up	1.91494	8.05214e-264
LOC114275123	up	1.6212	7.82397e-14	false	0.626373	0.0119115	up	1.6212	7.82397e-14
LOC114275190	up	2.37555	0.000259923	false	-0.631817	0.304984	up	2.37555	0.000259923
LOC114275198	up	3.89073	0	false	0.694263	5.92457e-12	up	3.89073	0
LOC114275205	up	3.06203	0	false	0.10824	0.623307	up	3.06203	0
LOC114275237	up	1.72542	1.47786e-184	false	0.0265278	0.887809	up	1.72542	1.47786e-184
LOC114275248	up	4.8289	5.2631e-10	false	0.777965	0.141447	up	4.8289	5.2631e-10
LOC114275265	up	2.84024	7.44727e-08	false	-0.446682	0.381758	up	2.84024	7.44727e-08
LOC114275272	up	4.65609	2.18525e-07	false	0.174856	0.842582	up	4.65609	2.18525e-07
LOC114275318	up	1.06053	9.07408e-13	false	-0.0138503	0.967469	up	1.06053	9.07408e-13
LOC114275320	up	2.44705	2.79153e-165	false	-0.0701304	0.706855	up	2.44705	2.79153e-165
LOC114275342	up	2.39153	2.38865e-79	false	0.468463	0.00418167	up	2.39153	2.38865e-79
LOC114275407	up	4.62263	0	false	0.376555	0.0235827	up	4.62263	0
LOC114275428	up	3.59791	0	false	0.201075	0.228656	up	3.59791	0
LOC114275468	up	3.48572	5.80073e-08	false	-0.162967	0.849192	up	3.48572	5.80073e-08
LOC114275471	up	1.35299	7.97548e-29	false	0.256656	0.167204	up	1.35299	7.97548e-29
LOC114275495	up	1.26977	1.79812e-12	false	-0.690459	0.000111462	up	1.26977	1.79812e-12
LOC114275500	up	1.96173	1.17071e-15	false	0.624285	0.0357753	up	1.96173	1.17071e-15
LOC114275507	up	1.73889	2.18723e-05	false	0.482016	0.447696	up	1.73889	2.18723e-05
LOC114275514	up	2.08858	6.25563e-145	false	-0.44821	0.000172539	up	2.08858	6.25563e-145
LOC114277270	up	6.2303	2.4182e-57	up	1.98655	2.95538e-20	up	6.2303	2.4182e-57
LOC114275526	up	1.79786	5.68398e-70	false	0.0582701	0.793252	up	1.79786	5.68398e-70
LOC114277271	up	5.29633	4.42558e-89	up	1.89693	3.49137e-23	up	5.29633	4.42558e-89
LOC114275567	up	1.92688	0.000209764	false	-0.493708	0.409364	up	1.92688	0.000209764
LOC114275699	up	4.07754	0	false	-0.351981	0.0969215	up	4.07754	0
LOC114275701	up	1.68834	5.8484e-44	false	-0.208962	0.405371	up	1.68834	5.8484e-44
LOC114275736	up	2.74734	6.95455e-27	false	0.178492	0.714439	up	2.74734	6.95455e-27
LOC114275744	up	1.63581	0.000405302	false	0.307597	0.659592	up	1.63581	0.000405302
LOC114275757	up	1.20508	2.18024e-17	false	0.0482338	0.882547	up	1.20508	2.18024e-17
LOC114277621	up	3.07429	0.00111497	up	1.08543	0.00156478	up	3.07429	0.00111497
LOC114277682	up	4.97688	0	up	1.29864	2.85696e-35	up	4.97688	0
LOC114276072	up	2.63645	2.48103e-31	false	0.43959	0.072024	up	2.63645	2.48103e-31
LOC114276074	up	1.17065	1.3993e-37	false	0.0696687	0.747613	up	1.17065	1.3993e-37
LOC114276077	up	1.01761	2.06929e-09	false	-0.0769905	0.835412	up	1.01761	2.06929e-09
LOC114276091	up	7.9665	6.26504e-39	false	0.604277	0.000459857	up	7.9665	6.26504e-39
LOC114276141	up	4.78334	5.22436e-10	false	0.513643	0.369248	up	4.78334	5.22436e-10
LOC114276228	up	3.48703	1.3246e-190	false	0.274685	0.320045	up	3.48703	1.3246e-190
LOC114276233	up	1.83804	2.53834e-216	false	0.167559	0.271419	up	1.83804	2.53834e-216
LOC114276246	up	3.02679	1.81561e-114	false	0.139187	0.459586	up	3.02679	1.81561e-114
LOC114276251	up	3.1963	6.59934e-18	false	0.162338	0.724624	up	3.1963	6.59934e-18
LOC114277696	up	5.7409	0	up	1.43788	8.50703e-35	up	5.7409	0
LOC114276281	up	1.4704	2.53261e-89	false	-0.348859	0.00484496	up	1.4704	2.53261e-89
LOC114276316	up	1.9429	3.3515e-41	false	0.587701	0.000319273	up	1.9429	3.3515e-41
LOC114276327	up	1.53307	7.5008e-57	false	0.483175	0.0244081	up	1.53307	7.5008e-57
LOC114276342	up	2.04254	1.64617e-187	false	0.604833	4.67932e-06	up	2.04254	1.64617e-187
LOC114276353	up	1.58371	5.4449e-166	false	0.390143	0.00763255	up	1.58371	5.4449e-166
LOC114276397	up	1.43411	4.62468e-10	false	0.227745	0.672371	up	1.43411	4.62468e-10
LOC114276512	up	5.77751	6.60449e-61	false	0.197697	0.424858	up	5.77751	6.60449e-61
LOC114276513	up	2.12165	2.52859e-11	false	0.617149	0.106777	up	2.12165	2.52859e-11
LOC114276579	up	1.50454	1.23819e-32	false	0.067335	0.79763	up	1.50454	1.23819e-32
LOC114276580	up	1.46168	0.0160362	false	-0.324158	0.705418	up	1.46168	0.0160362
LOC114276586	up	1.40507	1.11012e-80	false	0.265218	0.106397	up	1.40507	1.11012e-80
LOC114277912	up	4.07596	1.09142e-67	up	1.21836	3.61539e-11	up	4.07596	1.09142e-67
LOC114276614	up	1.05315	2.78988e-25	false	-0.0363731	0.87988	up	1.05315	2.78988e-25
LOC114276615	up	2.07869	1.20047e-26	false	0.0848761	0.796259	up	2.07869	1.20047e-26
LOC114278066	up	2.69617	4.51732e-27	up	1.34783	5.49327e-08	up	2.69617	4.51732e-27
LOC114276658	up	3.27211	5.16535e-41	false	-0.064276	0.868943	up	3.27211	5.16535e-41
LOC114276662	up	1.23152	7.60318e-43	false	0.139683	0.505202	up	1.23152	7.60318e-43
LOC114276672	up	1.24825	1.33017e-98	false	0.107576	0.447404	up	1.24825	1.33017e-98
LOC114276690	up	1.06045	1.58301e-08	false	0.0415383	0.919777	up	1.06045	1.58301e-08
LOC114276722	up	1.6335	3.40205e-188	false	0.530443	1.01041e-06	up	1.6335	3.40205e-188
LOC114276724	up	1.94103	2.41168e-29	false	0.817567	1.21625e-05	up	1.94103	2.41168e-29
LOC114276728	up	2.17466	3.91311e-25	false	0.494156	0.0647162	up	2.17466	3.91311e-25
LOC114276765	up	3.5629	1.95084e-296	false	0.52454	8.0955e-06	up	3.5629	1.95084e-296
LOC114276824	up	2.47933	5.22922e-07	false	0.169634	0.820931	up	2.47933	5.22922e-07
LOC114276872	up	1.09611	6.98923e-95	false	0.0571603	0.720229	up	1.09611	6.98923e-95
LOC114278133	up	2.88774	3.38901e-09	up	1.07306	0.0297503	up	2.88774	3.38901e-09
LOC114276909	up	1.88668	1.36184e-64	false	0.34925	0.0402666	up	1.88668	1.36184e-64
LOC114276967	up	3.45773	1.47311e-132	false	0.27582	0.112674	up	3.45773	1.47311e-132
LOC114277000	up	1.54426	1.83274e-121	false	0.393631	0.000217843	up	1.54426	1.83274e-121
LOC114278733	up	4.04066	6.09842e-268	up	1.19021	9.84494e-25	up	4.04066	6.09842e-268
LOC114277041	up	1.01199	0.00980506	false	-0.525381	0.255	up	1.01199	0.00980506
LOC114277083	up	2.4453	1.62945e-11	false	0.885206	0.0149348	up	2.4453	1.62945e-11
LOC114277121	up	4.88646	0	false	0.479434	7.48138e-05	up	4.88646	0
LOC114277134	up	1.01651	0.00229173	false	-0.937152	0.00396024	up	1.01651	0.00229173
LOC114277136	up	2.27458	6.17357e-07	false	0.646553	0.263682	up	2.27458	6.17357e-07
LOC114277166	up	2.08782	8.23263e-42	false	0.937679	1.88048e-07	up	2.08782	8.23263e-42
LOC114277188	up	1.96416	5.00669e-22	false	0.350234	0.162302	up	1.96416	5.00669e-22
LOC114277201	up	1.24731	9.72447e-05	false	-0.43818	0.255944	up	1.24731	9.72447e-05
LOC114277241	up	1.41703	0.000886187	false	-0.126366	0.872138	up	1.41703	0.000886187
LOC114278923	up	10.7636	1.87173e-305	up	1.42015	1.785e-39	up	10.7636	1.87173e-305
LOC114277264	up	3.06879	1.53768e-212	false	0.221655	0.187746	up	3.06879	1.53768e-212
LOC114277269	up	2.22669	4.60175e-173	false	0.802654	7.87779e-09	up	2.22669	4.60175e-173
LOC114278939	up	5.48031	2.68841e-235	up	3.75149	4.34408e-145	up	5.48031	2.68841e-235
LOC114279058	up	2.3403	2.64587e-50	up	1.30033	2.46534e-13	up	2.3403	2.64587e-50
LOC114277282	up	5.11002	5.13339e-255	false	0.189327	0.179725	up	5.11002	5.13339e-255
LOC114277283	up	1.21828	5.54251e-06	false	-0.107191	0.844463	up	1.21828	5.54251e-06
LOC114277305	up	2.04837	5.03236e-22	false	0.590585	0.0182421	up	2.04837	5.03236e-22
LOC114277333	up	1.06222	1.62204e-66	false	-0.911765	5.51004e-07	up	1.06222	1.62204e-66
LOC114277387	up	1.15008	2.71755e-45	false	0.112655	0.521423	up	1.15008	2.71755e-45
LOC114277446	up	1.99088	4.24002e-07	false	0.224577	0.77643	up	1.99088	4.24002e-07
LOC114277488	up	2.14763	5.57643e-19	false	0.364715	0.295256	up	2.14763	5.57643e-19
LOC114277489	up	1.08208	2.25935e-08	false	-0.0511066	0.892777	up	1.08208	2.25935e-08
LOC114277547	up	1.64639	6.51082e-10	false	0.290098	0.532382	up	1.64639	6.51082e-10
LOC114277570	up	1.96649	3.46815e-60	false	0.650344	6.70634e-06	up	1.96649	3.46815e-60
LOC114277589	up	1.90032	3.39326e-16	false	0.236435	0.45656	up	1.90032	3.39326e-16
LOC114279403	up	3.08144	4.4626e-15	up	1.0862	0.00319415	up	3.08144	4.4626e-15
LOC114277628	up	1.0097	3.99546e-26	false	-0.123175	0.680671	up	1.0097	3.99546e-26
LOC114277659	up	1.19795	6.21247e-62	false	0.152085	0.403002	up	1.19795	6.21247e-62
LOC114277660	up	1.82211	8.59454e-70	false	0.158497	0.377121	up	1.82211	8.59454e-70
LOC114279494	up	3.12732	1.80082e-14	up	1.36476	0.000182673	up	3.12732	1.80082e-14
LOC114279622	up	3.78298	6.4122e-14	up	1.43335	0.000442799	up	3.78298	6.4122e-14
LOC114277699	up	1.15457	1.15216e-51	false	0.144498	0.306263	up	1.15457	1.15216e-51
LOC114277704	up	3.11185	0	false	0.415645	7.56783e-06	up	3.11185	0
LOC114277706	up	2.69796	5.83284e-33	false	-0.367483	0.0971467	up	2.69796	5.83284e-33
LOC114277733	up	2.65869	0	false	0.184773	0.164658	up	2.65869	0
LOC114277757	up	1.86407	5.74711e-222	false	0.0192951	0.92379	up	1.86407	5.74711e-222
LOC114277780	up	1.60692	2.28363e-100	false	0.298012	0.011378	up	1.60692	2.28363e-100
LOC114277802	up	2.26873	1.67461e-15	false	-0.387144	0.236462	up	2.26873	1.67461e-15
LOC114277811	up	1.14632	3.93764e-07	false	0.014074	0.97686	up	1.14632	3.93764e-07
LOC114277871	up	2.04401	7.83248e-56	false	-0.127605	0.541176	up	2.04401	7.83248e-56
LOC114277888	up	3.54748	5.45952e-201	false	0.339865	0.0278091	up	3.54748	5.45952e-201
LOC114277891	up	1.2944	6.59547e-56	false	-0.084396	0.737428	up	1.2944	6.59547e-56
LOC114279693	up	2.64629	1.2042e-62	up	1.16929	1.88398e-12	up	2.64629	1.2042e-62
LOC114277920	up	1.92498	1.55708e-92	false	-0.25056	0.235934	up	1.92498	1.55708e-92
LOC114277932	up	2.32046	5.6991e-36	false	-0.495707	0.0155452	up	2.32046	5.6991e-36
LOC114277979	up	3.55765	5.33276e-146	false	0.630105	3.31346e-05	up	3.55765	5.33276e-146
LOC114277981	up	1.63589	1.67157e-19	false	-0.236187	0.40118	up	1.63589	1.67157e-19
LOC114277982	up	1.3039	6.0864e-164	false	-0.531119	2.36992e-05	up	1.3039	6.0864e-164
LOC114278032	up	2.23258	5.11816e-09	false	-0.73127	0.068698	up	2.23258	5.11816e-09
LOC114278048	up	2.58271	1.46791e-10	false	0.10529	0.866785	up	2.58271	1.46791e-10
LOC114278057	up	1.78694	8.22603e-120	false	0.102293	0.525001	up	1.78694	8.22603e-120
LOC114279694	up	3.09774	2.89424e-27	up	1.25318	2.25508e-05	up	3.09774	2.89424e-27
LOC114278087	up	1.43068	1.33752e-74	false	0.245368	0.0845539	up	1.43068	1.33752e-74
LOC114278125	up	4.15919	0	false	0.457124	1.70265e-05	up	4.15919	0
LOC114279701	up	3.03107	1.64179e-268	up	1.103	1.01888e-23	up	3.03107	1.64179e-268
LOC114278138	up	2.20372	3.15518e-70	false	-0.0445084	0.854863	up	2.20372	3.15518e-70
LOC114278139	up	4.32371	6.06198e-51	false	0.241643	0.69493	up	4.32371	6.06198e-51
LOC114278183	up	1.99588	3.92329e-45	false	-0.585614	4.03194e-05	up	1.99588	3.92329e-45
LOC114278184	up	3.52005	3.22694e-208	false	0.424741	0.0010677	up	3.52005	3.22694e-208
LOC114278207	up	2.82474	2.52157e-146	false	0.930981	7.27894e-15	up	2.82474	2.52157e-146
LOC114278245	up	5.76532	3.95863e-27	false	0.651482	0.0128607	up	5.76532	3.95863e-27
LOC114278299	up	2.69967	3.03037e-10	false	0.303783	0.548422	up	2.69967	3.03037e-10
LOC114278348	up	1.94151	2.24669e-41	false	0.590317	0.000344337	up	1.94151	2.24669e-41
LOC114278349	up	2.12212	1.03645e-235	false	0.587684	1.09647e-08	up	2.12212	1.03645e-235
LOC114278370	up	3.85862	1.08046e-20	false	0.665277	0.0746037	up	3.85862	1.08046e-20
LOC114278384	up	1.27661	6.41328e-98	false	0.114876	0.443111	up	1.27661	6.41328e-98
LOC114278385	up	2.8531	9.60702e-66	false	0.0118603	0.973857	up	2.8531	9.60702e-66
LOC114278388	up	2.59456	0	false	0.397293	5.86141e-05	up	2.59456	0
LOC114278398	up	1.33968	7.83535e-102	false	-0.180239	0.161353	up	1.33968	7.83535e-102
LOC114278399	up	1.69498	6.12221e-07	false	0.241011	0.642618	up	1.69498	6.12221e-07
LOC114278485	up	1.70293	3.45863e-134	false	-0.30335	0.00639363	up	1.70293	3.45863e-134
LOC114278495	up	1.98079	7.38161e-89	false	0.201224	0.212748	up	1.98079	7.38161e-89
LOC114278497	up	1.18163	1.2546e-09	false	-0.148156	0.340342	up	1.18163	1.2546e-09
LOC114278524	up	1.13292	5.68995e-10	false	-0.222495	0.449716	up	1.13292	5.68995e-10
LOC114278685	up	2.64275	1.3994e-142	false	0.182863	0.253229	up	2.64275	1.3994e-142
LOC114278694	up	2.36595	2.43078e-78	false	0.600546	0.000150187	up	2.36595	2.43078e-78
LOC114278702	up	1.64547	1.7369e-137	false	-0.117134	0.647845	up	1.64547	1.7369e-137
LOC114279880	up	7.62573	9.02479e-81	up	1.80107	2.12007e-37	up	7.62573	9.02479e-81
LOC114278734	up	4.5475	0	false	-0.0647391	0.825146	up	4.5475	0
LOC114278743	up	1.50985	3.77966e-42	false	0.033938	0.894211	up	1.50985	3.77966e-42
LOC114278749	up	3.304	0	false	-0.174719	0.186563	up	3.304	0
LOC114278766	up	1.17596	5.74758e-47	false	0.0662622	0.756199	up	1.17596	5.74758e-47
LOC114278783	up	1.46531	3.86356e-110	false	0.426405	3.4541e-05	up	1.46531	3.86356e-110
LOC114278798	up	2.95492	0	false	0.187323	0.0855667	up	2.95492	0
LOC114279936	up	6.83579	5.19728e-268	up	1.69643	9.55662e-20	up	6.83579	5.19728e-268
LOC114278820	up	1.39761	5.13992e-66	false	0.212981	0.108317	up	1.39761	5.13992e-66
LOC114278867	up	2.52278	1.00219e-36	false	0.512299	0.00786575	up	2.52278	1.00219e-36
LOC114278869	up	1.66606	2.65336e-82	false	0.0744024	0.687102	up	1.66606	2.65336e-82
LOC114278876	up	1.19229	6.39809e-87	false	-0.424652	1.92671e-05	up	1.19229	6.39809e-87
LOC114278902	up	1.00454	1.036e-70	false	-0.0403181	0.868165	up	1.00454	1.036e-70
LOC114278922	up	1.7852	8.89624e-06	false	0.161234	0.801714	up	1.7852	8.89624e-06
LOC114279969	up	6.22519	1.35683e-58	up	2.35119	2.891e-64	up	6.22519	1.35683e-58
LOC114278927	up	1.85599	1.14029e-32	false	0.710123	0.000259377	up	1.85599	1.14029e-32
LOC114278933	up	1.68149	2.42736e-25	false	-0.386143	0.0543614	up	1.68149	2.42736e-25
LOC114278934	up	1.97041	3.70636e-14	false	-0.254604	0.457986	up	1.97041	3.70636e-14
LOC114280048	up	3.18059	1.05107e-242	up	1.19047	8.34013e-27	up	3.18059	1.05107e-242
LOC114278956	up	3.29237	0	false	0.95664	1.49758e-20	up	3.29237	0
LOC114278957	up	3.02039	0	false	0.781606	2.0632e-18	up	3.02039	0
LOC114278958	up	1.11992	1.39559e-49	false	-0.0151315	0.954188	up	1.11992	1.39559e-49
LOC114278995	up	1.73247	4.28343e-15	false	0.348535	0.312936	up	1.73247	4.28343e-15
LOC114279022	up	1.38322	2.11056e-11	false	-0.152867	0.636447	up	1.38322	2.11056e-11
LOC114279026	up	1.51955	0.00270617	false	0.263909	0.745629	up	1.51955	0.00270617
LOC114279034	up	2.05117	1.18468e-28	false	0.26991	0.259766	up	2.05117	1.18468e-28
LOC114280409	up	3.91491	8.12339e-26	up	1.80353	2.55861e-08	up	3.91491	8.12339e-26
LOC114279109	up	3.04294	0	false	0.77307	3.69668e-13	up	3.04294	0
LOC114279175	up	1.27444	6.83088e-44	false	-0.0591494	0.839726	up	1.27444	6.83088e-44
LOC114279181	up	1.40585	2.21483e-105	false	0.131635	0.310976	up	1.40585	2.21483e-105
LOC114279192	up	2.10162	1.46214e-196	false	0.391659	0.00401255	up	2.10162	1.46214e-196
LOC114279198	up	3.13007	1.06898e-10	false	0.0410932	0.955131	up	3.13007	1.06898e-10
LOC114279212	up	1.5034	2.78314e-06	false	0.50821	0.232962	up	1.5034	2.78314e-06
LOC114279219	up	1.37303	1.17968e-132	false	0.20241	0.0931236	up	1.37303	1.17968e-132
LOC114279220	up	1.87973	1.465e-133	false	0.0922041	0.556812	up	1.87973	1.465e-133
LOC114279224	up	1.55228	1.17724e-133	false	-0.160454	0.212748	up	1.55228	1.17724e-133
LOC114279246	up	1.62995	9.27235e-120	false	0.0634369	0.784026	up	1.62995	9.27235e-120
LOC114279251	up	1.19403	2.26784e-17	false	-0.131443	0.665222	up	1.19403	2.26784e-17
LOC114279259	up	2.27571	2.16701e-07	false	0.613517	0.238062	up	2.27571	2.16701e-07
LOC114279268	up	1.28325	9.22547e-60	false	0.154202	0.347861	up	1.28325	9.22547e-60
LOC114279301	up	6.55388	2.73068e-09	false	0.212488	0.738762	up	6.55388	2.73068e-09
LOC114279312	up	4.50579	3.66291e-100	false	0.787793	2.69183e-05	up	4.50579	3.66291e-100
LOC114279313	up	1.88343	8.78193e-158	false	-0.027733	0.900372	up	1.88343	8.78193e-158
LOC114279317	up	1.87908	3.54501e-124	false	0.205323	0.132024	up	1.87908	3.54501e-124
LOC114279318	up	1.0155	1.85038e-24	false	0.0220169	0.935258	up	1.0155	1.85038e-24
LOC114279327	up	2.07343	8.72635e-17	false	0.862964	0.00154514	up	2.07343	8.72635e-17
LOC114279374	up	1.51263	1.22782e-119	false	0.262419	0.0325878	up	1.51263	1.22782e-119
LOC114279383	up	1.31548	0.00690255	false	-0.164343	0.852176	up	1.31548	0.00690255
LOC114279386	up	4.73206	0	false	0.724055	3.21809e-17	up	4.73206	0
LOC114280494	up	3.74733	2.23974e-12	up	1.65813	0.0018748	up	3.74733	2.23974e-12
LOC114279410	up	2.94949	5.42111e-136	false	0.938333	1.72857e-11	up	2.94949	5.42111e-136
LOC114279411	up	3.0322	1.96092e-215	false	0.577302	0.00170244	up	3.0322	1.96092e-215
LOC114279418	up	3.62399	2.07609e-219	false	0.389596	0.0201574	up	3.62399	2.07609e-219
LOC114279421	up	1.20698	0.0029651	false	0.0490668	0.951569	up	1.20698	0.0029651
LOC114279455	up	2.7031	7.80115e-260	false	0.704268	0.101075	up	2.7031	7.80115e-260
LOC114279481	up	2.52717	1.25926e-102	false	0.4016	0.00847357	up	2.52717	1.25926e-102
LOC114279486	up	1.33897	7.91436e-108	false	0.196979	0.206064	up	1.33897	7.91436e-108
LOC114279490	up	1.22455	3.56878e-05	false	0.0336837	0.950978	up	1.22455	3.56878e-05
LOC114280570	up	4.3977	0	up	1.6458	3.07948e-31	up	4.3977	0
LOC114279497	up	1.17234	0.000543534	false	-0.375562	0.442127	up	1.17234	0.000543534
LOC114279558	up	1.97685	4.8414e-29	false	0.103824	0.730853	up	1.97685	4.8414e-29
LOC114279565	up	2.12517	8.56883e-34	false	0.00726799	0.984142	up	2.12517	8.56883e-34
LOC114279567	up	2.36744	0	false	0.755303	1.95697e-14	up	2.36744	0
LOC114279571	up	1.67874	6.40329e-12	false	-0.134593	0.724852	up	1.67874	6.40329e-12
LOC114279572	up	1.09285	0.00282167	false	-0.184083	0.773316	up	1.09285	0.00282167
LOC114279611	up	1.5745	4.48348e-11	false	-0.0871823	0.838259	up	1.5745	4.48348e-11
LOC114280887	up	3.54821	1.80331e-224	up	1.29296	1.30957e-20	up	3.54821	1.80331e-224
LOC114279634	up	1.94388	6.01288e-84	false	0.0759408	0.785471	up	1.94388	6.01288e-84
LOC114279655	up	5.39279	3.16572e-163	false	0.251197	0.109122	up	5.39279	3.16572e-163
LOC114279675	up	2.04133	3.00591e-15	false	0.155503	0.705896	up	2.04133	3.00591e-15
LOC114279685	up	2.2225	2.23089e-288	false	0.361137	0.00141389	up	2.2225	2.23089e-288
LOC114279688	up	1.94502	2.55466e-26	false	0.205525	0.534956	up	1.94502	2.55466e-26
LOC114280892	up	3.59112	0	up	1.19812	1.03894e-36	up	3.59112	0
LOC114280948	up	4.59292	7.63549e-48	up	1.67524	5.91459e-13	up	4.59292	7.63549e-48
LOC114281236	up	3.94126	2.91683e-107	up	1.17007	0.00444866	up	3.94126	2.91683e-107
LOC114279704	up	2.1707	0	false	-0.407661	0.00205418	up	2.1707	0
LOC114279744	up	1.65641	1.24656e-126	false	-0.104151	0.65427	up	1.65641	1.24656e-126
LOC114279798	up	2.70094	1.60113e-27	false	0.00223809	0.99531	up	2.70094	1.60113e-27
LOC114279809	up	1.79776	4.11657e-08	false	0.406791	0.275116	up	1.79776	4.11657e-08
LOC114279811	up	3.00132	3.58209e-221	false	0.915956	4.29959e-15	up	3.00132	3.58209e-221
LOC114279819	up	3.5271	5.49818e-55	false	0.416891	0.0630914	up	3.5271	5.49818e-55
LOC114279849	up	1.8032	5.91677e-28	false	0.16552	0.54012	up	1.8032	5.91677e-28
LOC114281380	up	5.59065	3.0967e-163	up	1.4908	1.06512e-06	up	5.59065	3.0967e-163
LOC114281381	up	2.26774	1.64559e-70	up	1.16892	1.18256e-14	up	2.26774	1.64559e-70
LOC114279953	up	2.19288	2.98631e-32	false	0.680126	0.00129379	up	2.19288	2.98631e-32
LOC114279962	up	2.75057	0	false	0.495994	0.000122093	up	2.75057	0
LOC114281636	up	7.58784	1.88471e-46	up	1.46235	2.04464e-19	up	7.58784	1.88471e-46
LOC114279970	up	1.22989	1.27717e-39	false	0.152772	0.378167	up	1.22989	1.27717e-39
LOC114279995	up	1.97186	6.25244e-62	false	0.250946	0.20936	up	1.97186	6.25244e-62
LOC114280040	up	1.77246	3.1454e-85	false	0.148676	0.370892	up	1.77246	3.1454e-85
LOC114282103	up	5.17131	3.88161e-88	up	1.04569	1.25233e-07	up	5.17131	3.88161e-88
LOC114280050	up	1.2903	1.9697e-69	false	0.0677776	0.763379	up	1.2903	1.9697e-69
LOC114280062	up	2.4403	0	false	-0.574413	1.6273e-07	up	2.4403	0
LOC114280090	up	1.59631	2.53153e-41	false	-0.625729	2.92587e-05	up	1.59631	2.53153e-41
LOC114280112	up	1.93614	0.000395284	false	0.358752	0.691836	up	1.93614	0.000395284
LOC114280113	up	2.7669	0	false	0.925462	7.42565e-16	up	2.7669	0
LOC114280188	up	1.51256	1.25269e-07	false	0.481509	0.210056	up	1.51256	1.25269e-07
LOC114280194	up	1.27727	2.24821e-36	false	0.277099	0.0589314	up	1.27727	2.24821e-36
LOC114280222	up	1.31098	7.16922e-129	false	0.264104	0.012395	up	1.31098	7.16922e-129
LOC114280225	up	1.60549	3.50976e-136	false	0.0765213	0.774997	up	1.60549	3.50976e-136
LOC114280241	up	1.30339	9.72378e-10	false	0.137275	0.716156	up	1.30339	9.72378e-10
LOC114280254	up	2.07713	1.6062e-19	false	0.820972	0.000896711	up	2.07713	1.6062e-19
LOC114280272	up	4.27971	1.10787e-08	false	0.250874	0.739337	up	4.27971	1.10787e-08
LOC114280283	up	3.7393	0	false	0.00384279	0.98945	up	3.7393	0
LOC114280284	up	2.01519	3.12319e-14	false	0.886783	0.000860747	up	2.01519	3.12319e-14
LOC114280298	up	1.34211	1.97829e-35	false	0.0173521	0.951569	up	1.34211	1.97829e-35
LOC114280397	up	2.33163	1.10356e-31	false	-0.150793	0.630663	up	2.33163	1.10356e-31
LOC114280399	up	3.02534	0	false	0.71752	4.9966e-17	up	3.02534	0
LOC114282921	up	2.60375	2.33055e-94	up	1.12298	1.38775e-17	up	2.60375	2.33055e-94
LOC114280424	up	3.82333	5.41267e-121	false	0.551379	0.00178732	up	3.82333	5.41267e-121
LOC114280446	up	1.38627	1.9997e-12	false	0.107823	0.770319	up	1.38627	1.9997e-12
LOC114280471	up	1.64463	1.59682e-155	false	0.319322	0.0158837	up	1.64463	1.59682e-155
LOC114280484	up	1.87154	9.16578e-52	false	0.409646	0.0352118	up	1.87154	9.16578e-52
LOC114283672	up	3.49682	4.87188e-30	up	1.39002	4.0699e-07	up	3.49682	4.87188e-30
LOC114280512	up	7.53692	2.14287e-12	false	0.498735	0.132565	up	7.53692	2.14287e-12
LOC114280529	up	5.40512	0	false	0.797748	1.49136e-20	up	5.40512	0
LOC114280530	up	1.70664	5.76228e-138	false	0.331606	0.0060429	up	1.70664	5.76228e-138
LOC114280541	up	2.24383	5.95407e-172	false	0.10745	0.601588	up	2.24383	5.95407e-172
LOC114284116	up	3.31869	2.70957e-228	up	1.54254	5.91803e-34	up	3.31869	2.70957e-228
LOC114280573	up	1.13631	3.31649e-51	false	0.142988	0.374932	up	1.13631	3.31649e-51
LOC114280579	up	1.23535	3.17822e-19	false	0.0407838	0.889723	up	1.23535	3.17822e-19
LOC114280580	up	1.62773	5.9431e-08	false	0.101636	0.855786	up	1.62773	5.9431e-08
LOC114280585	up	1.84199	1.6518e-181	false	0.549796	3.99253e-07	up	1.84199	1.6518e-181
LOC114280624	up	2.57279	0	false	0.199504	0.0810392	up	2.57279	0
LOC114280684	up	1.04398	0.0318351	false	-0.156667	0.862182	up	1.04398	0.0318351
LOC114280728	up	1.48279	1.59823e-61	false	-0.0106954	0.963631	up	1.48279	1.59823e-61
LOC114280746	up	1.42936	1.80435e-10	false	-0.50952	0.242442	up	1.42936	1.80435e-10
LOC114280756	up	2.81501	1.36786e-33	false	0.333238	0.241338	up	2.81501	1.36786e-33
LOC114280759	up	1.45763	5.46882e-39	false	0.366474	0.0162272	up	1.45763	5.46882e-39
LOC114280802	up	2.07065	1.68098e-19	false	0.410825	0.154635	up	2.07065	1.68098e-19
LOC114280825	up	1.91201	0	false	-0.196672	0.234691	up	1.91201	0
LOC114280860	up	1.35107	8.20555e-37	false	0.276333	0.0881443	up	1.35107	8.20555e-37
LOC114280872	up	2.41184	5.96012e-42	false	0.886468	1.62257e-06	up	2.41184	5.96012e-42
LOC114284846	up	4.99833	0	up	1.09598	3.98763e-24	up	4.99833	0
LOC114285584	up	8.35335	6.43058e-50	up	1.2567	1.6376e-14	up	8.35335	6.43058e-50
LOC114280906	up	1.5658	8.4495e-59	false	-0.298506	0.136306	up	1.5658	8.4495e-59
LOC114285843	up	2.46234	2.59744e-29	up	1.22558	4.90127e-08	up	2.46234	2.59744e-29
LOC114280951	up	1.34226	6.1242e-71	false	0.319936	0.00877426	up	1.34226	6.1242e-71
LOC114280978	up	1.86339	1.00623e-13	false	0.55265	0.0703939	up	1.86339	1.00623e-13
LOC114280985	up	1.27887	0.000209561	false	-0.110524	0.858503	up	1.27887	0.000209561
LOC114280988	up	1.56992	6.08419e-56	false	0.281308	0.0676002	up	1.56992	6.08419e-56
LOC114281020	up	5.04795	0	false	0.42084	1.46679e-06	up	5.04795	0
LOC114281046	up	1.31611	2.43007e-38	false	0.262255	0.0604773	up	1.31611	2.43007e-38
LOC114281051	up	1.32965	4.38885e-13	false	0.0402398	0.919777	up	1.32965	4.38885e-13
LOC114281108	up	1.9063	7.61357e-15	false	0.710322	0.0485184	up	1.9063	7.61357e-15
LOC114281116	up	3.34144	2.66208e-38	false	0.942586	0.00022914	up	3.34144	2.66208e-38
LOC114281130	up	3.41055	4.36738e-18	false	0.625394	0.114829	up	3.41055	4.36738e-18
LOC114281143	up	1.79857	5.24088e-08	false	0.422184	0.389783	up	1.79857	5.24088e-08
LOC114281157	up	1.83623	2.3128e-13	false	-0.693652	0.00235936	up	1.83623	2.3128e-13
LOC114281165	up	1.52049	5.36714e-15	false	-0.51905	0.0309632	up	1.52049	5.36714e-15
LOC114281186	up	2.03499	6.10189e-33	false	0.0568777	0.869763	up	2.03499	6.10189e-33
LOC114285885	up	2.72873	5.85298e-131	up	1.00966	8.12558e-14	up	2.72873	5.85298e-131
LOC114281240	up	1.18572	8.44575e-17	false	-0.0108897	0.975525	up	1.18572	8.44575e-17
LOC114281251	up	1.81709	4.29176e-261	false	0.14146	0.438636	up	1.81709	4.29176e-261
LOC114281292	up	1.70724	1.90858e-05	false	0.117986	0.863484	up	1.70724	1.90858e-05
LOC114281303	up	2.98929	5.57696e-168	false	0.686554	2.3566e-09	up	2.98929	5.57696e-168
LOC114286261	up	2.55255	1.39384e-249	up	1.21813	4.68413e-16	up	2.55255	1.39384e-249
LOC114286546	up	9.04673	1.28809e-13	up	1.55702	2.67266e-07	up	9.04673	1.28809e-13
LOC114281387	up	4.70639	0	false	0.820674	3.81705e-12	up	4.70639	0
LOC114281427	up	2.34671	0	false	0.492127	1.26196e-07	up	2.34671	0
LOC114281430	up	2.13629	7.23293e-96	false	0.224921	0.242412	up	2.13629	7.23293e-96
LOC114281483	up	2.14964	8.38453e-176	false	0.172011	0.251262	up	2.14964	8.38453e-176
LOC114281487	up	2.32483	9.55488e-46	false	0.191819	0.463704	up	2.32483	9.55488e-46
LOC114281498	up	4.52637	1.54383e-23	false	0.550044	0.105126	up	4.52637	1.54383e-23
LOC114281521	up	2.6717	6.31089e-167	false	0.524045	7.56783e-06	up	2.6717	6.31089e-167
LOC114281523	up	1.8041	1.60499e-142	false	0.417468	7.0967e-05	up	1.8041	1.60499e-142
LOC114281524	up	1.03318	1.94888e-29	false	0.0332204	0.901714	up	1.03318	1.94888e-29
LOC114281560	up	1.41006	0.00062516	false	0.156611	0.82692	up	1.41006	0.00062516
LOC114281614	up	1.54018	1.74076e-94	false	0.40006	0.00245006	up	1.54018	1.74076e-94
LOC114281621	up	1.47009	2.92381e-96	false	-0.468326	0.000103003	up	1.47009	2.92381e-96
LOC114281623	up	2.23536	1.0117e-200	false	0.450284	1.69418e-05	up	2.23536	1.0117e-200
LOC114281633	up	3.82355	1.33447e-54	false	0.326219	0.163548	up	3.82355	1.33447e-54
LOC114287443	up	2.49106	3.96861e-74	up	1.18743	4.68002e-16	up	2.49106	3.96861e-74
LOC114281643	up	2.74452	1.83914e-132	false	0.87558	1.25183e-12	up	2.74452	1.83914e-132
LOC114281648	up	2.35229	0	false	-0.0169974	0.934304	up	2.35229	0
LOC114281650	up	4.43774	0	false	0.298358	0.00556315	up	4.43774	0
LOC114281659	up	2.49668	1.78962e-33	false	-0.310287	0.146931	up	2.49668	1.78962e-33
LOC114281662	up	1.38136	1.53436e-16	false	-0.176565	0.557407	up	1.38136	1.53436e-16
LOC114281666	up	3.21296	8.86426e-249	false	0.160288	0.250159	up	3.21296	8.86426e-249
LOC114281688	up	1.04915	1.06458e-64	false	0.0423203	0.843747	up	1.04915	1.06458e-64
LOC114281769	up	2.96998	5.62455e-64	false	0.763935	0.00215552	up	2.96998	5.62455e-64
LOC114281775	up	2.87382	0	false	0.780425	1.98305e-16	up	2.87382	0
LOC114281813	up	1.00365	6.49735e-26	false	-0.0915986	0.637811	up	1.00365	6.49735e-26
LOC114281851	up	1.879	2.62669e-28	false	-0.402522	0.171946	up	1.879	2.62669e-28
LOC114281914	up	1.87653	2.59245e-62	false	0.795561	6.84229e-09	up	1.87653	2.59245e-62
LOC114281931	up	1.49345	5.86415e-41	false	0.186901	0.411554	up	1.49345	5.86415e-41
LOC114281950	up	1.2745	5.54293e-97	false	0.165114	0.243608	up	1.2745	5.54293e-97
LOC114281955	up	4.36744	0	false	-0.285745	0.0705371	up	4.36744	0
LOC114281992	up	1.56026	3.74308e-135	false	0.0998412	0.506681	up	1.56026	3.74308e-135
LOC114281996	up	6.43847	4.05455e-31	false	0.96599	0.000256367	up	6.43847	4.05455e-31
LOC114281998	up	3.33263	0	false	0.0499885	0.87235	up	3.33263	0
LOC114282000	up	1.9717	6.7171e-17	false	0.257411	0.430409	up	1.9717	6.7171e-17
LOC114282010	up	2.69328	1.11505e-06	false	0.125719	0.77846	up	2.69328	1.11505e-06
LOC114282012	up	1.71267	4.13662e-65	false	-0.821015	4.8297e-08	up	1.71267	4.13662e-65
LOC114282029	up	7.9294	1.85009e-10	false	-0.167207	0.713968	up	7.9294	1.85009e-10
LOC114282051	up	1.69921	2.41436e-08	false	-0.0306104	0.95808	up	1.69921	2.41436e-08
LOC114282071	up	3.5011	2.8466e-12	false	0.900403	0.0517473	up	3.5011	2.8466e-12
LOC114282075	up	1.44246	3.04279e-64	false	-0.219486	0.210056	up	1.44246	3.04279e-64
LOC114282101	up	2.38791	0.000132358	false	0.341437	0.697899	up	2.38791	0.000132358
LOC114287604	up	4.94727	6.14152e-160	up	2.05762	8.5505e-44	up	4.94727	6.14152e-160
LOC114282108	up	1.38811	3.53342e-09	false	-0.541157	0.0281056	up	1.38811	3.53342e-09
LOC114282145	up	1.33835	2.49986e-10	false	-0.0399334	0.926314	up	1.33835	2.49986e-10
LOC114282178	up	1.81825	1.5278e-77	false	0.239739	0.106658	up	1.81825	1.5278e-77
LOC114282179	up	3.65388	3.4181e-228	false	-0.0379829	0.881575	up	3.65388	3.4181e-228
LOC114282192	up	1.70614	2.63341e-220	false	0.234014	0.0556112	up	1.70614	2.63341e-220
LOC114282253	up	1.54179	8.23606e-76	false	-0.00566043	0.984328	up	1.54179	8.23606e-76
LOC114282257	up	2.40944	4.68958e-80	false	0.824274	8.4351e-09	up	2.40944	4.68958e-80
LOC114282263	up	1.03823	1.61378e-33	false	-0.240471	0.197413	up	1.03823	1.61378e-33
LOC114282269	up	5.90867	6.39607e-257	false	0.493633	7.98662e-06	up	5.90867	6.39607e-257
LOC114282301	up	1.55715	5.82309e-301	false	-0.137337	0.392753	up	1.55715	5.82309e-301
LOC114282302	up	2.46816	0	false	-0.303804	0.0106376	up	2.46816	0
LOC114282314	up	1.7729	3.41725e-122	false	-0.131718	0.3742	up	1.7729	3.41725e-122
LOC114282323	up	1.97053	2.28145e-12	false	0.204511	0.650216	up	1.97053	2.28145e-12
LOC114282324	up	2.54071	3.61158e-298	false	0.15191	0.290309	up	2.54071	3.61158e-298
LOC114282330	up	3.0149	2.74663e-181	false	0.476416	0.00022914	up	3.0149	2.74663e-181
LOC114282344	up	1.29838	1.05637e-77	false	0.0824858	0.677162	up	1.29838	1.05637e-77
LOC114282383	up	3.06276	2.28167e-07	false	0.179487	0.822893	up	3.06276	2.28167e-07
LOC114282401	up	2.78477	2.53726e-06	false	0.123141	0.888419	up	2.78477	2.53726e-06
LOC114282411	up	2.57216	3.93433e-16	false	0.318581	0.41639	up	2.57216	3.93433e-16
LOC114282415	up	1.87009	9.21598e-19	false	0.473904	0.077047	up	1.87009	9.21598e-19
LOC114282433	up	1.18189	3.74126e-63	false	0.0968149	0.570389	up	1.18189	3.74126e-63
LOC114282434	up	1.71137	1.07944e-99	false	-0.418961	0.000798348	up	1.71137	1.07944e-99
LOC114282504	up	1.31858	6.44725e-12	false	0.190019	0.497212	up	1.31858	6.44725e-12
LOC114282515	up	1.16224	5.0423e-89	false	0.0376585	0.882989	up	1.16224	5.0423e-89
LOC114282516	up	1.20571	1.92346e-32	false	0.0108361	0.966351	up	1.20571	1.92346e-32
LOC114282525	up	3.95162	1.2473e-142	false	-0.263753	0.165482	up	3.95162	1.2473e-142
LOC114282527	up	1.06786	1.68295e-23	false	0.0413124	0.879667	up	1.06786	1.68295e-23
LOC114282558	up	2.77176	0	false	-0.236102	0.0540758	up	2.77176	0
LOC114282564	up	1.3286	2.88332e-31	false	0.058304	0.858658	up	1.3286	2.88332e-31
LOC114282588	up	2.53176	8.38103e-168	false	0.498266	1.58938e-05	up	2.53176	8.38103e-168
LOC114282610	up	1.74838	1.272e-304	false	0.302086	0.00194575	up	1.74838	1.272e-304
LOC114282624	up	2.067	4.88185e-112	false	0.386024	0.00470747	up	2.067	4.88185e-112
LOC114282638	up	1.54914	2.73501e-09	false	-0.135707	0.740601	up	1.54914	2.73501e-09
LOC114282643	up	2.0181	2.21765e-06	false	-0.329942	0.526366	up	2.0181	2.21765e-06
LOC114282658	up	1.4808	2.85787e-45	false	0.322652	0.061006	up	1.4808	2.85787e-45
LOC114282712	up	1.38858	3.89851e-26	false	0.0980735	0.72941	up	1.38858	3.89851e-26
LOC114282714	up	1.31027	1.14327e-41	false	0.0836758	0.702917	up	1.31027	1.14327e-41
LOC114282734	up	1.19157	0.00646335	false	-0.771452	0.124516	up	1.19157	0.00646335
LOC114282736	up	2.61671	3.23201e-14	false	0.129513	0.80046	up	2.61671	3.23201e-14
LOC114282814	up	1.87387	4.3847e-37	false	0.378986	0.0347756	up	1.87387	4.3847e-37
LOC114282836	up	1.9091	3.52002e-22	false	0.463855	0.0589314	up	1.9091	3.52002e-22
LOC114282848	up	2.25966	4.04307e-77	false	0.157045	0.402062	up	2.25966	4.04307e-77
LOC114282851	up	1.67733	7.53025e-08	false	0.389522	0.314221	up	1.67733	7.53025e-08
LOC114282858	up	4.53023	7.55118e-82	false	0.228963	0.281964	up	4.53023	7.55118e-82
LOC114282892	up	7.39595	4.50675e-188	false	0.411791	0.00368532	up	7.39595	4.50675e-188
LOC114282918	up	2.29619	2.44878e-08	false	0.0206615	0.977243	up	2.29619	2.44878e-08
LOC114287797	up	4.15044	4.47333e-49	up	1.05059	2.29942e-06	up	4.15044	4.47333e-49
LOC114282925	up	2.00632	2.66161e-10	false	0.142933	0.783235	up	2.00632	2.66161e-10
LOC114282934	up	2.07769	0	false	0.0319493	0.865525	up	2.07769	0
LOC114282935	up	1.58095	7.75676e-169	false	-0.175321	0.128127	up	1.58095	7.75676e-169
LOC114282972	up	1.3866	0.0115887	false	-0.603826	0.361628	up	1.3866	0.0115887
LOC114283002	up	2.21915	4.88716e-218	false	0.266287	0.0622839	up	2.21915	4.88716e-218
LOC114283009	up	3.29914	5.66551e-211	false	-0.0311043	0.897778	up	3.29914	5.66551e-211
LOC114283015	up	1.87278	6.52168e-100	false	-0.0703218	0.745521	up	1.87278	6.52168e-100
LOC114283046	up	2.66063	0	false	0.440035	6.35043e-06	up	2.66063	0
LOC114283064	up	1.17618	6.94391e-32	false	-0.274069	0.0775257	up	1.17618	6.94391e-32
LOC114283068	up	2.29915	1.37411e-10	false	0.397501	0.358771	up	2.29915	1.37411e-10
LOC114283108	up	2.52881	2.95313e-07	false	0.160264	0.823948	up	2.52881	2.95313e-07
LOC114283128	up	1.33576	1.43517e-07	false	-0.161984	0.711913	up	1.33576	1.43517e-07
LOC114283150	up	7.55799	2.20032e-240	false	0.516941	2.00578e-06	up	7.55799	2.20032e-240
LOC114283164	up	2.40918	0	false	-0.0938521	0.526451	up	2.40918	0
LOC114283181	up	1.47971	1.65313e-78	false	0.380185	0.00198363	up	1.47971	1.65313e-78
LOC114283195	up	2.64369	4.40375e-221	false	0.606266	7.84187e-05	up	2.64369	4.40375e-221
LOC114283233	up	2.05764	0.00241976	false	-0.0470749	0.965204	up	2.05764	0.00241976
LOC114283247	up	3.48547	2.99984e-135	false	-0.0402173	0.864939	up	3.48547	2.99984e-135
LOC114283257	up	3.61461	3.73386e-16	false	0.988955	0.0246896	up	3.61461	3.73386e-16
LOC114283261	up	1.05023	1.61662e-26	false	0.0264324	0.92093	up	1.05023	1.61662e-26
LOC114283267	up	2.08314	3.91259e-08	false	0.150097	0.794255	up	2.08314	3.91259e-08
LOC114283271	up	1.25859	5.8419e-05	false	0.164245	0.765715	up	1.25859	5.8419e-05
LOC114283318	up	1.68907	9.43667e-05	false	0.242949	0.735525	up	1.68907	9.43667e-05
LOC114283345	up	4.24411	7.85691e-212	false	0.621255	0.00013813	up	4.24411	7.85691e-212
LOC114283348	up	1.89574	1.08188e-09	false	0.333186	0.48324	up	1.89574	1.08188e-09
LOC114283423	up	1.33665	3.86299e-05	false	0.187919	0.734087	up	1.33665	3.86299e-05
LOC114283426	up	2.51299	1.73745e-178	false	-0.0339938	0.889723	up	2.51299	1.73745e-178
LOC114283458	up	1.47353	2.95756e-06	false	-0.620609	0.0829582	up	1.47353	2.95756e-06
LOC114283480	up	2.64012	0	false	0.736154	1.67964e-08	up	2.64012	0
LOC114283487	up	1.40425	4.55773e-05	false	-0.124386	0.857397	up	1.40425	4.55773e-05
LOC114283492	up	1.14749	5.95004e-58	false	0.0590254	0.762244	up	1.14749	5.95004e-58
LOC114283525	up	2.79834	0	false	0.319132	0.00114893	up	2.79834	0
LOC114283540	up	2.25638	4.44687e-283	false	0.0939441	0.577909	up	2.25638	4.44687e-283
LOC114283565	up	2.74398	9.80164e-97	false	-0.348257	0.0960394	up	2.74398	9.80164e-97
LOC114283582	up	1.93563	0	false	0.43804	0.000316854	up	1.93563	0
LOC114283638	up	1.96446	1.65742e-85	false	0.00601302	0.98508	up	1.96446	1.65742e-85
LOC114288037	up	6.46176	0	up	1.93817	2.85682e-66	up	6.46176	0
LOC114283727	up	2.9933	5.96273e-20	false	-0.894595	6.85845e-05	up	2.9933	5.96273e-20
LOC114283749	up	1.69406	2.68969e-05	false	-0.265704	0.594522	up	1.69406	2.68969e-05
LOC114283754	up	1.76195	1.26159e-09	false	-0.0915186	0.850707	up	1.76195	1.26159e-09
LOC114283761	up	2.17774	4.85433e-53	false	0.783168	1.35912e-06	up	2.17774	4.85433e-53
LOC114283834	up	2.25414	1.65645e-71	false	0.535461	0.000151952	up	2.25414	1.65645e-71
LOC114283880	up	2.07646	6.34027e-15	false	0.224823	0.583079	up	2.07646	6.34027e-15
LOC114283883	up	5.95288	3.81199e-29	false	0.76808	0.00589399	up	5.95288	3.81199e-29
LOC114283893	up	1.39849	2.29433e-49	false	-0.00558872	0.983791	up	1.39849	2.29433e-49
LOC114283948	up	2.1652	1.05525e-06	false	0.93544	0.0655897	up	2.1652	1.05525e-06
LOC114283965	up	2.41827	9.63254e-273	false	0.497472	1.67058e-07	up	2.41827	9.63254e-273
LOC114283969	up	1.89839	3.63413e-293	false	-0.0667168	0.709814	up	1.89839	3.63413e-293
LOC114284020	up	2.83674	0	false	0.0103512	0.977089	up	2.83674	0
LOC114284032	up	1.45924	1.15238e-138	false	0.260578	0.100228	up	1.45924	1.15238e-138
LOC114284036	up	4.18152	0	false	0.539497	2.15126e-06	up	4.18152	0
LOC114284037	up	1.38359	9.78327e-70	false	0.127535	0.429827	up	1.38359	9.78327e-70
LOC114284091	up	2.52082	1.04392e-15	false	0.506474	0.138845	up	2.52082	1.04392e-15
LOC114284104	up	1.8712	5.66123e-05	false	0.00811069	0.992883	up	1.8712	5.66123e-05
LOC114284107	up	6.89036	4.44016e-185	false	0.795954	5.1262e-08	up	6.89036	4.44016e-185
LOC114284110	up	1.09091	5.84477e-27	false	0.0754899	0.745506	up	1.09091	5.84477e-27
LOC114284113	up	1.83495	4.37865e-33	false	0.191269	0.391405	up	1.83495	4.37865e-33
LOC114288424	up	4.33495	0	up	1.33753	2.72042e-32	up	4.33495	0
LOC114284123	up	1.83406	6.44893e-06	false	0.53611	0.306726	up	1.83406	6.44893e-06
LOC114284148	up	1.10337	3.03278e-05	false	-0.0238693	0.968627	up	1.10337	3.03278e-05
LOC114284192	up	2.45755	0	false	-0.0311097	0.864561	up	2.45755	0
LOC114284211	up	1.47455	7.71652e-88	false	0.306264	0.0590827	up	1.47455	7.71652e-88
LOC114284245	up	2.16022	6.04995e-210	false	0.210077	0.0922358	up	2.16022	6.04995e-210
LOC114284246	up	1.12315	0.00745294	false	-0.183789	0.783797	up	1.12315	0.00745294
LOC114284250	up	2.03995	4.64573e-57	false	0.341281	0.0616116	up	2.03995	4.64573e-57
LOC114284269	up	2.86289	8.83587e-13	false	0.810136	0.0384494	up	2.86289	8.83587e-13
LOC114284346	up	1.45637	3.28281e-54	false	0.0907083	0.649656	up	1.45637	3.28281e-54
LOC114284379	up	2.67878	9.16573e-228	false	0.286106	0.0298851	up	2.67878	9.16573e-228
LOC114284392	up	1.28549	8.48743e-19	false	-0.293201	0.310696	up	1.28549	8.48743e-19
LOC114284407	up	2.10553	5.13863e-29	false	0.0855116	0.801577	up	2.10553	5.13863e-29
LOC114284411	up	1.33471	1.167e-11	false	-0.129779	0.726944	up	1.33471	1.167e-11
LOC114284428	up	2.12198	2.01634e-62	false	0.381301	0.0361853	up	2.12198	2.01634e-62
LOC114284475	up	1.5529	1.04656e-44	false	0.341794	0.0309545	up	1.5529	1.04656e-44
LOC114284516	up	2.45241	6.63652e-05	false	0.243807	0.781148	up	2.45241	6.63652e-05
LOC114284525	up	3.67989	8.88634e-29	false	-0.0362517	0.938733	up	3.67989	8.88634e-29
LOC114284529	up	1.06875	6.51501e-58	false	-0.190105	0.314221	up	1.06875	6.51501e-58
LOC114284533	up	1.85831	6.02907e-82	false	0.376329	0.00480669	up	1.85831	6.02907e-82
LOC114284534	up	1.3629	4.42807e-34	false	0.0420418	0.868234	up	1.3629	4.42807e-34
LOC114284619	up	1.4142	1.09315e-08	false	0.290736	0.455522	up	1.4142	1.09315e-08
LOC114284626	up	1.86629	1.94701e-07	false	-0.464115	0.282467	up	1.86629	1.94701e-07
LOC114284630	up	1.06166	6.67399e-09	false	-0.180096	0.532736	up	1.06166	6.67399e-09
LOC114284676	up	1.88571	7.74229e-19	false	-0.658355	0.00112614	up	1.88571	7.74229e-19
LOC114284682	up	1.42837	0.0038167	false	0.224902	0.775752	up	1.42837	0.0038167
LOC114284699	up	1.1807	4.16829e-120	false	0.128333	0.333446	up	1.1807	4.16829e-120
LOC114284705	up	1.67024	4.36157e-10	false	0.100284	0.832493	up	1.67024	4.36157e-10
LOC114284708	up	1.79842	1.68716e-36	false	0.165856	0.484169	up	1.79842	1.68716e-36
LOC114284711	up	2.46416	5.55618e-24	false	-0.967666	7.03249e-07	up	2.46416	5.55618e-24
LOC114284715	up	2.30457	6.65523e-07	false	0.753649	0.151894	up	2.30457	6.65523e-07
LOC114284780	up	3.01569	7.55514e-17	false	-0.244879	0.58928	up	3.01569	7.55514e-17
LOC114284792	up	2.48485	2.72154e-303	false	0.703399	1.54321e-12	up	2.48485	2.72154e-303
LOC114284800	up	1.24949	2.25613e-118	false	0.243392	0.0348318	up	1.24949	2.25613e-118
LOC114284837	up	1.51468	4.33195e-38	false	0.229537	0.208792	up	1.51468	4.33195e-38
LOC114284841	up	2.68609	2.66718e-35	false	-0.0985569	0.750699	up	2.68609	2.66718e-35
LOC114284842	up	2.35438	6.12586e-32	false	-0.281767	0.34269	up	2.35438	6.12586e-32
LOC114288630	up	11.4128	2.75829e-21	up	1.48665	8.98345e-20	up	11.4128	2.75829e-21
LOC114284847	up	1.20778	6.46593e-08	false	-0.452348	0.141597	up	1.20778	6.46593e-08
LOC114284915	up	1.78745	1.63464e-05	false	0.335896	0.573066	up	1.78745	1.63464e-05
LOC114285001	up	1.24299	7.20573e-06	false	-0.544857	0.537321	up	1.24299	7.20573e-06
LOC114285002	up	1.42054	1.05203e-31	false	-0.155163	0.418271	up	1.42054	1.05203e-31
LOC114285005	up	1.05555	3.42436e-07	false	-0.782067	0.00263748	up	1.05555	3.42436e-07
LOC114285047	up	1.15287	2.2118e-44	false	0.0106935	0.970506	up	1.15287	2.2118e-44
LOC114285056	up	1.86547	1.32951e-58	false	0.772326	5.02836e-05	up	1.86547	1.32951e-58
LOC114285068	up	1.51185	0.00015401	false	0.479901	0.387636	up	1.51185	0.00015401
LOC114285069	up	2.21872	9.31867e-227	false	0.534429	1.89837e-05	up	2.21872	9.31867e-227
LOC114285070	up	1.78648	3.38047e-88	false	0.151917	0.365161	up	1.78648	3.38047e-88
LOC114285078	up	1.77627	9.44805e-18	false	0.442797	0.201039	up	1.77627	9.44805e-18
LOC114285088	up	1.84816	1.10641e-139	false	0.348916	0.00446911	up	1.84816	1.10641e-139
LOC114285098	up	1.65397	0.000119184	false	-0.304325	0.600535	up	1.65397	0.000119184
LOC114285105	up	2.23356	2.07535e-101	false	0.13465	0.461034	up	2.23356	2.07535e-101
LOC114285116	up	2.14952	1.45629e-154	false	-0.724008	4.58698e-08	up	2.14952	1.45629e-154
LOC114285117	up	2.31404	5.64721e-187	false	0.529013	2.37519e-06	up	2.31404	5.64721e-187
LOC114285127	up	3.28624	0	false	0.410442	0.00515464	up	3.28624	0
LOC114285157	up	1.47952	8.76382e-68	false	-0.0938038	0.606673	up	1.47952	8.76382e-68
LOC114285162	up	1.65891	8.20214e-05	false	0.0902582	0.902247	up	1.65891	8.20214e-05
LOC114285163	up	1.26238	3.69931e-06	false	0.272589	0.584407	up	1.26238	3.69931e-06
LOC114285183	up	1.52135	1.56785e-63	false	0.419934	0.02266	up	1.52135	1.56785e-63
LOC114285189	up	1.48472	0.0113103	false	-0.44579	0.541295	up	1.48472	0.0113103
LOC114285190	up	1.92789	1.47379e-37	false	0.245966	0.229816	up	1.92789	1.47379e-37
LOC114285233	up	2.66651	4.349e-17	false	0.229036	0.572648	up	2.66651	4.349e-17
LOC114285237	up	2.02082	5.05587e-63	false	0.915669	7.67561e-11	up	2.02082	5.05587e-63
LOC114285238	up	2.05105	7.13072e-39	false	0.978075	2.94699e-07	up	2.05105	7.13072e-39
LOC114285239	up	1.6457	3.17289e-88	false	0.45348	0.000470086	up	1.6457	3.17289e-88
LOC114285253	up	1.19278	2.06808e-56	false	-0.403144	0.0235852	up	1.19278	2.06808e-56
LOC114285258	up	1.12487	4.27505e-34	false	-0.00787678	0.982985	up	1.12487	4.27505e-34
LOC114285275	up	2.1955	1.69357e-14	false	-0.0672439	0.895529	up	2.1955	1.69357e-14
LOC114285277	up	4.82645	0	false	0.436334	0.00027688	up	4.82645	0
LOC114288804	up	5.44565	1.44267e-66	up	1.50096	1.04994e-14	up	5.44565	1.44267e-66
LOC114285320	up	1.0395	3.67076e-52	false	-0.457062	0.0011625	up	1.0395	3.67076e-52
LOC114285323	up	1.2142	6.54886e-68	false	-0.108172	0.498215	up	1.2142	6.54886e-68
LOC114285329	up	1.84852	0.000752651	false	0.200462	0.602568	up	1.84852	0.000752651
LOC114285352	up	1.41649	0.00876964	false	0.0894376	0.927477	up	1.41649	0.00876964
LOC114285404	up	5.8574	2.79799e-07	false	-0.00274328	0.997015	up	5.8574	2.79799e-07
LOC114285407	up	2.9343	7.78348e-08	false	0.0743322	0.922959	up	2.9343	7.78348e-08
LOC114285428	up	2.35034	3.40227e-57	false	0.344999	0.152228	up	2.35034	3.40227e-57
LOC114285430	up	1.77596	8.74411e-65	false	0.420791	0.00371332	up	1.77596	8.74411e-65
LOC114285553	up	1.46244	1.19865e-42	false	0.466265	0.0011689	up	1.46244	1.19865e-42
LOC114285554	up	1.58543	1.97409e-57	false	0.0863686	0.669134	up	1.58543	1.97409e-57
LOC114285558	up	1.96014	4.16803e-18	false	0.0449453	0.920049	up	1.96014	4.16803e-18
LOC114285565	up	2.09362	9.54312e-07	false	-0.0971453	0.897151	up	2.09362	9.54312e-07
LOC114285566	up	1.68133	9.78718e-17	false	-0.15546	0.713696	up	1.68133	9.78718e-17
LOC114289194	up	3.12429	2.91688e-58	up	1.00948	1.74518e-07	up	3.12429	2.91688e-58
LOC114285595	up	5.80376	5.18376e-112	false	0.921814	6.8438e-10	up	5.80376	5.18376e-112
LOC114285598	up	2.4032	7.16863e-90	false	0.300652	0.0553338	up	2.4032	7.16863e-90
LOC114285600	up	2.1191	1.16629e-124	false	0.166084	0.296442	up	2.1191	1.16629e-124
LOC114285618	up	1.44111	9.5885e-35	false	0.214861	0.373366	up	1.44111	9.5885e-35
LOC114285673	up	1.00465	9.41005e-37	false	-0.438563	0.000658563	up	1.00465	9.41005e-37
LOC114285675	up	1.60855	6.77605e-85	false	0.158838	0.306878	up	1.60855	6.77605e-85
LOC114285691	up	2.82339	1.77321e-16	false	0.140664	0.813879	up	2.82339	1.77321e-16
LOC114285699	up	5.41928	1.39234e-15	false	-0.0679792	0.910886	up	5.41928	1.39234e-15
LOC114285772	up	6.90237	8.92867e-08	false	-0.152605	0.832053	up	6.90237	8.92867e-08
LOC114285795	up	3.00274	1.88763e-199	false	-0.291706	0.0270936	up	3.00274	1.88763e-199
LOC114285841	up	1.21116	4.66814e-35	false	0.107157	0.582391	up	1.21116	4.66814e-35
LOC114289915	up	8.26541	4.24575e-76	up	2.31509	3.22847e-64	up	8.26541	4.24575e-76
LOC114285863	up	1.35805	1.28598e-14	false	0.34836	0.111911	up	1.35805	1.28598e-14
LOC114285871	up	3.79096	0	false	0.133885	0.324077	up	3.79096	0
LOC114290333	up	6.14173	7.78311e-184	up	1.21114	3.11405e-20	up	6.14173	7.78311e-184
LOC114285887	up	2.95364	0	false	0.374772	0.00235791	up	2.95364	0
LOC114285888	up	1.6311	2.71211e-12	false	-0.0697584	0.877748	up	1.6311	2.71211e-12
LOC114285905	up	4.30153	3.82142e-176	false	0.657314	0.00272931	up	4.30153	3.82142e-176
LOC114285932	up	1.62603	9.11257e-16	false	0.0595205	0.905337	up	1.62603	9.11257e-16
LOC114285977	up	1.53253	3.22812e-70	false	0.260678	0.0881852	up	1.53253	3.22812e-70
LOC114285991	up	1.5748	3.56206e-67	false	-0.0573245	0.805185	up	1.5748	3.56206e-67
LOC114285997	up	1.44519	5.01754e-13	false	-0.598566	0.0100696	up	1.44519	5.01754e-13
LOC114286011	up	2.16055	5.14281e-08	false	-0.247891	0.656068	up	2.16055	5.14281e-08
LOC114286018	up	1.79441	1.64239e-101	false	0.30634	0.0739793	up	1.79441	1.64239e-101
LOC114286022	up	1.82647	4.85707e-86	false	0.458267	0.00159623	up	1.82647	4.85707e-86
LOC114286052	up	1.43216	3.96494e-06	false	-0.261667	0.53981	up	1.43216	3.96494e-06
LOC114286073	up	1.13548	6.77916e-25	false	0.0369474	0.905869	up	1.13548	6.77916e-25
LOC114286079	up	1.24901	6.21598e-89	false	-0.0103965	0.966044	up	1.24901	6.21598e-89
LOC114286082	up	3.50359	4.93259e-10	false	0.344463	0.597249	up	3.50359	4.93259e-10
LOC114286105	up	1.48634	6.25145e-06	false	-0.230519	0.69493	up	1.48634	6.25145e-06
LOC114286112	up	1.61834	8.92218e-10	false	-0.0630865	0.896516	up	1.61834	8.92218e-10
LOC114286129	up	1.44357	3.70357e-123	false	-0.315633	0.0160804	up	1.44357	3.70357e-123
LOC114286136	up	1.28379	5.05516e-93	false	-0.214896	0.25117	up	1.28379	5.05516e-93
LOC114286140	up	1.01908	2.68831e-21	false	-0.421031	0.0158825	up	1.01908	2.68831e-21
LOC114286142	up	1.02591	0.00090158	false	-0.111937	0.83763	up	1.02591	0.00090158
LOC114286146	up	1.00016	0.0162978	false	-0.698315	0.247326	up	1.00016	0.0162978
LOC114286184	up	1.68829	0.000683012	false	-0.0744551	0.929272	up	1.68829	0.000683012
LOC114286202	up	2.0108	4.24457e-47	false	-0.251022	0.286758	up	2.0108	4.24457e-47
LOC114286205	up	2.39365	9.52953e-20	false	-0.859859	7.99692e-05	up	2.39365	9.52953e-20
LOC114286258	up	4.25098	0	false	-0.0527187	0.756199	up	4.25098	0
LOC114290475	up	2.97068	3.09134e-61	up	1.26797	1.50542e-07	up	2.97068	3.09134e-61
LOC114286293	up	2.22212	1.01451e-179	false	0.296575	0.0280392	up	2.22212	1.01451e-179
LOC114286306	up	2.65302	4.74187e-13	false	-0.932947	0.000339737	up	2.65302	4.74187e-13
LOC114286310	up	2.52875	3.37545e-47	false	0.00668372	0.995593	up	2.52875	3.37545e-47
LOC114286357	up	4.77916	0	false	0.279604	0.00857187	up	4.77916	0
LOC114286361	up	1.49242	3.88203e-22	false	-0.242063	0.28252	up	1.49242	3.88203e-22
LOC114286364	up	3.06623	0	false	0.891457	4.26015e-13	up	3.06623	0
LOC114286418	up	1.69706	5.41327e-129	false	0.335351	0.0160151	up	1.69706	5.41327e-129
LOC114286449	up	2.25083	1.18718e-18	false	0.205395	0.526359	up	2.25083	1.18718e-18
LOC114286489	up	1.77845	1.39525e-07	false	-0.0710983	0.914864	up	1.77845	1.39525e-07
LOC114286492	up	3.25189	0	false	0.444763	5.06767e-07	up	3.25189	0
LOC114290635	up	9.40589	0	up	2.27326	3.13451e-86	up	9.40589	0
LOC114286559	up	1.17014	4.33968e-159	false	-0.0618114	0.713285	up	1.17014	4.33968e-159
LOC114286573	up	3.83224	0	false	0.685302	2.06467e-09	up	3.83224	0
LOC114286639	up	3.02619	3.66098e-49	false	0.629002	0.00128118	up	3.02619	3.66098e-49
LOC114286641	up	1.52868	3.24867e-05	false	0.171581	0.797458	up	1.52868	3.24867e-05
LOC114286677	up	1.76542	4.29354e-73	false	0.0667644	0.746498	up	1.76542	4.29354e-73
LOC114286694	up	1.67108	2.07538e-46	false	0.38871	0.00855965	up	1.67108	2.07538e-46
LOC114286712	up	1.19156	8.72761e-10	false	-0.198516	0.506681	up	1.19156	8.72761e-10
LOC114286723	up	1.07076	7.92233e-61	false	0.0647657	0.755865	up	1.07076	7.92233e-61
LOC114286735	up	5.34693	0	false	0.303802	0.0245159	up	5.34693	0
LOC114286756	up	7.80342	3.06354e-25	false	0.708702	0.000530473	up	7.80342	3.06354e-25
LOC114286779	up	3.22561	5.29301e-51	false	0.188087	0.447998	up	3.22561	5.29301e-51
LOC114286810	up	1.80123	4.00272e-82	false	-0.139315	0.533319	up	1.80123	4.00272e-82
LOC114286848	up	1.34887	1.61526e-16	false	-0.00899592	0.980859	up	1.34887	1.61526e-16
LOC114286870	up	3.37612	3.48564e-11	false	0.243461	0.678758	up	3.37612	3.48564e-11
LOC114286895	up	1.42527	9.89397e-209	false	0.0296298	0.894807	up	1.42527	9.89397e-209
LOC114286926	up	2.37951	7.91298e-51	false	0.0030516	0.992992	up	2.37951	7.91298e-51
LOC114286944	up	2.51334	3.13286e-07	false	0.932057	0.0897574	up	2.51334	3.13286e-07
LOC114287003	up	1.09393	7.90594e-101	false	-0.0989575	0.463704	up	1.09393	7.90594e-101
LOC114287005	up	1.31878	2.53121e-10	false	0.311724	0.264539	up	1.31878	2.53121e-10
LOC114287034	up	1.76336	2.93266e-36	false	0.20969	0.307234	up	1.76336	2.93266e-36
LOC114287046	up	3.39351	3.83447e-172	false	0.329289	0.018803	up	3.39351	3.83447e-172
LOC114287068	up	2.99068	5.27498e-233	false	0.233568	0.0790194	up	2.99068	5.27498e-233
LOC114287072	up	1.12632	3.97228e-08	false	0.0734478	0.867614	up	1.12632	3.97228e-08
LOC114287077	up	1.27073	7.35912e-27	false	-0.179377	0.353098	up	1.27073	7.35912e-27
LOC114287087	up	1.67984	1.66806e-05	false	0.329594	0.533652	up	1.67984	1.66806e-05
LOC114287094	up	4.28037	3.36028e-149	false	0.54867	0.00103698	up	4.28037	3.36028e-149
LOC114287115	up	1.97194	4.23154e-47	false	0.770568	0.000638631	up	1.97194	4.23154e-47
LOC114287121	up	4.12477	0	false	0.23058	0.0310002	up	4.12477	0
LOC114287155	up	1.32154	0.00094114	false	0.106399	0.892401	up	1.32154	0.00094114
LOC114287191	up	2.91758	3.30961e-94	false	-0.0649399	0.816532	up	2.91758	3.30961e-94
LOC114287200	up	1.14903	4.81524e-70	false	-0.0860972	0.619483	up	1.14903	4.81524e-70
LOC114287217	up	1.10482	9.24929e-44	false	-0.025981	0.901638	up	1.10482	9.24929e-44
LOC114287272	up	1.73073	3.0668e-153	false	0.555233	1.18599e-07	up	1.73073	3.0668e-153
LOC114287291	up	2.43838	1.96828e-13	false	0.596269	0.0941824	up	2.43838	1.96828e-13
LOC114287314	up	1.08891	0.000458414	false	-0.0915778	0.872307	up	1.08891	0.000458414
LOC114287330	up	3.2667	5.04351e-33	false	0.45266	0.197333	up	3.2667	5.04351e-33
LOC114287333	up	1.55008	1.04584e-60	false	0.451347	0.000994848	up	1.55008	1.04584e-60
LOC114287343	up	2.40394	6.43181e-192	false	0.448336	0.00013579	up	2.40394	6.43181e-192
LOC114287411	up	2.10812	4.55314e-59	false	0.259209	0.144481	up	2.10812	4.55314e-59
LOC114287431	up	1.47849	1.05493e-10	false	0.469032	0.134215	up	1.47849	1.05493e-10
LOC114290678	up	3.19656	1.37856e-10	up	1.06331	0.0223726	up	3.19656	1.37856e-10
LOC114287456	up	2.28598	7.48483e-143	false	0.891595	9.27119e-15	up	2.28598	7.48483e-143
LOC114287463	up	3.39571	3.94525e-36	false	0.593917	0.0184192	up	3.39571	3.94525e-36
LOC114287465	up	3.34364	2.95001e-167	false	0.740881	6.57726e-09	up	3.34364	2.95001e-167
LOC114287480	up	1.62256	1.67112e-15	false	-0.175874	0.569998	up	1.62256	1.67112e-15
LOC114287491	up	1.7847	1.67953e-19	false	0.12079	0.801319	up	1.7847	1.67953e-19
LOC114287507	up	1.06417	0.0139279	false	-0.187159	0.8254	up	1.06417	0.0139279
LOC114287515	up	1.70549	1.48053e-54	false	0.449657	0.00131745	up	1.70549	1.48053e-54
LOC114287551	up	3.11528	8.20618e-125	false	0.557592	7.06265e-05	up	3.11528	8.20618e-125
LOC114287563	up	1.59272	8.97561e-05	false	-0.414028	0.395696	up	1.59272	8.97561e-05
LOC114287599	up	2.87046	4.48846e-124	false	0.843856	6.62025e-11	up	2.87046	4.48846e-124
LOC114292151	up	2.51641	5.0084e-10	up	1.40681	0.000730206	up	2.51641	5.0084e-10
LOC114287732	up	2.14752	8.94422e-241	false	-0.117438	0.404138	up	2.14752	8.94422e-241
LOC114287752	up	3.31673	1.50431e-06	false	0.143398	0.872138	up	3.31673	1.50431e-06
LOC114292324	up	2.57568	5.41397e-13	up	1.1288	0.00145564	up	2.57568	5.41397e-13
LOC114287803	up	2.32042	3.18267e-12	false	0.340518	0.462904	up	2.32042	3.18267e-12
LOC114287806	up	2.81329	3.98234e-31	false	0.503786	0.0476875	up	2.81329	3.98234e-31
LOC114287809	up	1.81191	3.24494e-59	false	-0.152388	0.398358	up	1.81191	3.24494e-59
LOC114287810	up	2.92093	4.97678e-126	false	0.472586	0.000677335	up	2.92093	4.97678e-126
LOC114287853	up	2.45971	9.93601e-164	false	0.736679	6.96304e-11	up	2.45971	9.93601e-164
LOC114287867	up	2.01918	2.15124e-62	false	0.565554	4.21248e-05	up	2.01918	2.15124e-62
LOC114287881	up	3.21312	4.27142e-197	false	0.448981	0.00550393	up	3.21312	4.27142e-197
LOC114287882	up	1.32455	2.78607e-11	false	0.113083	0.760684	up	1.32455	2.78607e-11
LOC114287892	up	2.32175	6.25517e-37	false	-0.214555	0.340831	up	2.32175	6.25517e-37
LOC114287902	up	5.24163	0	false	0.898316	2.35996e-21	up	5.24163	0
LOC114287953	up	1.58728	6.44734e-22	false	0.179382	0.573892	up	1.58728	6.44734e-22
LOC114287991	up	1.803	4.79219e-19	false	0.753455	0.00108225	up	1.803	4.79219e-19
LOC114288036	up	1.07092	1.93431e-28	false	0.0469809	0.834854	up	1.07092	1.93431e-28
LOC114292338	up	7.17388	6.3405e-85	up	1.01733	8.38306e-11	up	7.17388	6.3405e-85
LOC114288055	up	2.25073	3.96735e-05	false	0.0285369	0.97686	up	2.25073	3.96735e-05
LOC114288074	up	1.51119	2.55435e-104	false	0.0846428	0.757227	up	1.51119	2.55435e-104
LOC114288092	up	1.17822	6.91669e-05	false	-0.0659466	0.91361	up	1.17822	6.91669e-05
LOC114288093	up	2.3132	0	false	0.200383	0.106669	up	2.3132	0
LOC114288135	up	1.38814	1.29226e-72	false	0.295103	0.0319531	up	1.38814	1.29226e-72
LOC114288184	up	4.41771	0	false	0.505653	6.30929e-06	up	4.41771	0
LOC114288185	up	3.35212	7.48064e-54	false	0.950297	8.17387e-07	up	3.35212	7.48064e-54
LOC114288291	up	5.03688	4.42414e-15	false	0.94419	0.00268222	up	5.03688	4.42414e-15
LOC114288341	up	1.49209	2.01379e-89	false	0.0653519	0.747866	up	1.49209	2.01379e-89
LOC114288370	up	5.11369	0	false	0.648481	0.092239	up	5.11369	0
LOC114288402	up	1.20897	1.28114e-09	false	0.159737	0.640381	up	1.20897	1.28114e-09
LOC114288415	up	1.80539	1.36797e-81	false	0.501083	3.54053e-05	up	1.80539	1.36797e-81
LOC114292422	up	2.89458	2.05081e-193	up	1.5086	4.71764e-27	up	2.89458	2.05081e-193
LOC114288437	up	1.37426	1.51136e-39	false	0.288239	0.0537591	up	1.37426	1.51136e-39
LOC114288441	up	2.07286	3.3706e-90	false	0.402133	0.00379949	up	2.07286	3.3706e-90
LOC114288445	up	1.97479	2.76169e-118	false	0.257797	0.0710368	up	1.97479	2.76169e-118
LOC114288461	up	1.45247	1.95888e-90	false	0.377224	0.00168057	up	1.45247	1.95888e-90
LOC114288487	up	1.44365	7.85563e-06	false	-0.244976	0.583898	up	1.44365	7.85563e-06
LOC114288488	up	2.05654	1.66449e-106	false	0.537634	0.00023442	up	2.05654	1.66449e-106
LOC114288489	up	2.18664	7.29901e-57	false	0.788443	0.00172023	up	2.18664	7.29901e-57
LOC114288507	up	1.71355	5.56039e-287	false	0.523154	3.74272e-09	up	1.71355	5.56039e-287
LOC114288551	up	2.64763	9.29267e-34	false	-0.0531702	0.87232	up	2.64763	9.29267e-34
LOC114288597	up	3.0005	0	false	0.96668	1.14884e-22	up	3.0005	0
LOC114292750	up	3.13058	6.18003e-52	up	1.51667	1.33961e-10	up	3.13058	6.18003e-52
LOC114288632	up	1.89254	3.15702e-66	false	0.0333981	0.893654	up	1.89254	3.15702e-66
LOC114288634	up	3.32205	8.374e-12	false	-0.561516	0.152566	up	3.32205	8.374e-12
LOC114288635	up	2.75435	0	false	0.574854	2.61305e-09	up	2.75435	0
LOC114288638	up	1.92943	1.46734e-33	false	-0.0860974	0.75425	up	1.92943	1.46734e-33
LOC114288687	up	1.64882	4.30632e-19	false	0.432025	0.0557951	up	1.64882	4.30632e-19
LOC114288731	up	2.73196	0	false	0.347754	0.0249546	up	2.73196	0
LOC114292830	up	2.78027	7.86325e-20	up	1.16811	0.000106844	up	2.78027	7.86325e-20
LOC114288806	up	1.80811	5.22099e-05	false	0.415254	0.526171	up	1.80811	5.22099e-05
LOC114288826	up	1.13324	5.11827e-49	false	-0.22245	0.234691	up	1.13324	5.11827e-49
LOC114288868	up	1.86727	9.83469e-45	false	0.504635	0.00128087	up	1.86727	9.83469e-45
LOC114288880	up	3.12432	5.46607e-266	false	-0.0678782	0.731635	up	3.12432	5.46607e-266
LOC114288911	up	2.12176	1.23232e-106	false	0.116687	0.55624	up	2.12176	1.23232e-106
LOC114288915	up	4.73243	9.20954e-112	false	0.934334	1.41694e-09	up	4.73243	9.20954e-112
LOC114288932	up	1.84315	1.63169e-48	false	0.175484	0.396172	up	1.84315	1.63169e-48
LOC114288947	up	3.8131	2.02488e-97	false	0.441596	0.00797264	up	3.8131	2.02488e-97
LOC114288981	up	2.10512	0	false	0.208614	0.214023	up	2.10512	0
LOC114289012	up	1.58433	2.95465e-145	false	0.0775662	0.6808	up	1.58433	2.95465e-145
LOC114289014	up	1.0619	7.14366e-40	false	0.029146	0.891689	up	1.0619	7.14366e-40
LOC114289027	up	5.75592	1.14469e-09	false	-0.375625	0.493463	up	5.75592	1.14469e-09
LOC114293243	up	6.30643	1.71831e-37	up	1.96364	6.32218e-18	up	6.30643	1.71831e-37
LOC114289254	up	1.6206	0.00187867	false	0.316901	0.706855	up	1.6206	0.00187867
LOC114289258	up	1.75435	1.1399e-42	false	0.421404	0.00295911	up	1.75435	1.1399e-42
LOC114289270	up	2.87675	7.57491e-12	false	0.261589	0.624486	up	2.87675	7.57491e-12
LOC114289353	up	1.04541	2.52119e-18	false	-0.0411593	0.89197	up	1.04541	2.52119e-18
LOC114289382	up	3.28661	6.1498e-71	false	-0.334409	0.0505967	up	3.28661	6.1498e-71
LOC114289395	up	5.64013	0	false	0.387298	0.000197394	up	5.64013	0
LOC114289397	up	1.8801	1.5816e-09	false	-0.295474	0.430704	up	1.8801	1.5816e-09
LOC114289431	up	1.58817	1.06704e-06	false	0.298508	0.529573	up	1.58817	1.06704e-06
LOC114289455	up	1.19171	2.8922e-50	false	0.205723	0.120035	up	1.19171	2.8922e-50
LOC114289551	up	1.32145	1.00351e-65	false	0.200029	0.229983	up	1.32145	1.00351e-65
LOC114289565	up	1.62154	6.08586e-18	false	0.587479	0.0150087	up	1.62154	6.08586e-18
LOC114289595	up	3.17119	2.75553e-37	false	0.288359	0.306976	up	3.17119	2.75553e-37
LOC114289608	up	2.04157	1.5402e-47	false	-0.213325	0.353075	up	2.04157	1.5402e-47
LOC114289638	up	5.19525	6.64323e-10	false	0.0742163	0.919552	up	5.19525	6.64323e-10
LOC114289642	up	1.58031	1.35636e-31	false	-0.285907	0.157509	up	1.58031	1.35636e-31
LOC114289646	up	1.13999	3.07396e-17	false	-0.075092	0.801714	up	1.13999	3.07396e-17
LOC114289667	up	1.63939	1.77873e-88	false	0.073902	0.756179	up	1.63939	1.77873e-88
LOC114289719	up	3.38202	1.09095e-12	false	0.176064	0.787988	up	3.38202	1.09095e-12
LOC114289730	up	1.2164	8.25501e-11	false	0.22421	0.480728	up	1.2164	8.25501e-11
LOC114289731	up	2.3222	5.28901e-14	false	-0.111945	0.803164	up	2.3222	5.28901e-14
LOC114289751	up	1.07331	2.20109e-11	false	-0.150747	0.536072	up	1.07331	2.20109e-11
LOC114289761	up	1.99692	5.12881e-71	false	0.301071	0.0695047	up	1.99692	5.12881e-71
LOC114289768	up	1.96781	2.9202e-122	false	0.343186	0.0714827	up	1.96781	2.9202e-122
LOC114289780	up	1.07886	5.74402e-67	false	-0.118798	0.441914	up	1.07886	5.74402e-67
LOC114289835	up	1.56187	6.14556e-101	false	0.0499289	0.78305	up	1.56187	6.14556e-101
LOC114289840	up	1.26285	0.0183704	false	-0.151509	0.870108	up	1.26285	0.0183704
LOC114289881	up	1.80348	6.62996e-66	false	-0.445475	0.000720495	up	1.80348	6.62996e-66
LOC114289885	up	3.56395	1.03164e-107	false	0.585095	0.000185802	up	3.56395	1.03164e-107
LOC114293320	up	3.04089	5.40415e-08	up	1.04485	3.58352e-05	up	3.04089	5.40415e-08
LOC114289944	up	2.03214	2.81047e-35	false	0.516254	0.0361026	up	2.03214	2.81047e-35
LOC114289958	up	1.53251	4.62061e-23	false	-0.0795478	0.808825	up	1.53251	4.62061e-23
LOC114289998	up	1.59142	1.7619e-175	false	0.0563895	0.802608	up	1.59142	1.7619e-175
LOC114290021	up	1.41095	1.51963e-112	false	0.0734229	0.64359	up	1.41095	1.51963e-112
LOC114290028	up	3.0071	0	false	0.392085	0.00973248	up	3.0071	0
LOC114290042	up	3.03228	2.83093e-255	false	0.740651	5.40402e-12	up	3.03228	2.83093e-255
LOC114290048	up	1.25623	0.00332525	false	-0.471123	0.405323	up	1.25623	0.00332525
LOC114290051	up	1.60824	1.32633e-84	false	-0.943708	2.63254e-21	up	1.60824	1.32633e-84
LOC114290063	up	1.0507	3.11048e-30	false	-0.017059	0.945402	up	1.0507	3.11048e-30
LOC114290071	up	3.83447	2.99962e-07	false	0.3407	0.670043	up	3.83447	2.99962e-07
LOC114290075	up	3.36752	1.04433e-33	false	0.313875	0.3049	up	3.36752	1.04433e-33
LOC114290092	up	1.57152	5.08412e-100	false	0.281279	0.0136487	up	1.57152	5.08412e-100
LOC114290102	up	1.29057	2.66961e-97	false	0.162175	0.219828	up	1.29057	2.66961e-97
LOC114290136	up	1.32404	3.08781e-47	false	-0.198137	0.440894	up	1.32404	3.08781e-47
LOC114290149	up	1.59607	0.000113201	false	0.119446	0.876419	up	1.59607	0.000113201
LOC114290167	up	1.21383	4.68515e-96	false	-0.0888928	0.58852	up	1.21383	4.68515e-96
LOC114290169	up	1.34623	0.00164831	false	-0.267741	0.700692	up	1.34623	0.00164831
LOC114290186	up	1.20799	6.42524e-59	false	-0.032285	0.894807	up	1.20799	6.42524e-59
LOC114290187	up	2.05418	2.05431e-14	false	0.405159	0.172202	up	2.05418	2.05431e-14
LOC114290193	up	3.48115	0	false	0.60605	4.32385e-09	up	3.48115	0
LOC114290194	up	1.34789	4.11128e-12	false	0.139979	0.675513	up	1.34789	4.11128e-12
LOC114290263	up	6.34422	2.18392e-51	false	0.989689	8.15094e-06	up	6.34422	2.18392e-51
LOC114290277	up	1.33453	4.41718e-83	false	0.192682	0.193987	up	1.33453	4.41718e-83
LOC114290282	up	2.29765	1.38835e-13	false	0.859405	0.0368074	up	2.29765	1.38835e-13
LOC114293696	up	2.67433	1.96223e-11	up	1.27158	0.00206905	up	2.67433	1.96223e-11
LOC114290364	up	1.26134	6.77222e-41	false	0.0553059	0.793128	up	1.26134	6.77222e-41
LOC114290403	up	5.62907	1.18814e-62	false	-0.0272531	0.929236	up	5.62907	1.18814e-62
LOC114290450	up	6.00638	0	false	0.643615	1.70436e-07	up	6.00638	0
LOC114290467	up	6.07004	0	false	0.752353	1.32626e-08	up	6.07004	0
LOC114290472	up	2.12432	1.27051e-43	false	0.617785	0.000368642	up	2.12432	1.27051e-43
LOC114290474	up	2.64432	1.26553e-303	false	-0.735403	1.06536e-05	up	2.64432	1.26553e-303
LOC114293733	up	4.44914	1.57186e-63	up	1.61253	8.55266e-17	up	4.44914	1.57186e-63
LOC114290501	up	1.74509	6.64793e-77	false	0.279673	0.0487556	up	1.74509	6.64793e-77
LOC114294066	up	8.52817	3.37328e-23	up	1.92992	4.48766e-23	up	8.52817	3.37328e-23
LOC114290514	up	1.61521	0.000239104	false	0.437556	0.503941	up	1.61521	0.000239104
LOC114290601	up	1.19484	9.74354e-24	false	-0.154258	0.439412	up	1.19484	9.74354e-24
LOC114290606	up	1.63792	4.08722e-90	false	0.273712	0.0379398	up	1.63792	4.08722e-90
LOC114290613	up	1.77771	2.9105e-167	false	0.264432	0.0227833	up	1.77771	2.9105e-167
LOC114290626	up	1.6001	0.000222472	false	-0.237812	0.69611	up	1.6001	0.000222472
LOC114290632	up	1.31891	1.27434e-85	false	0.0553604	0.839215	up	1.31891	1.27434e-85
LOC114294137	up	4.15535	3.99838e-59	up	1.55279	2.3386e-13	up	4.15535	3.99838e-59
LOC114290657	up	1.57214	6.7125e-05	false	-0.0520774	0.946444	up	1.57214	6.7125e-05
LOC114294195	up	4.18466	6.20045e-52	up	2.50314	1.72849e-23	up	4.18466	6.20045e-52
LOC114294334	up	6.09404	3.19055e-44	up	1.16411	7.18938e-09	up	6.09404	3.19055e-44
LOC114259967	up	3.50231	0	up	1.14081	1.68185e-42	up	3.50231	0
LOC114290713	up	2.05528	4.1122e-23	false	0.87223	0.00019289	up	2.05528	4.1122e-23
LOC114290721	up	1.7717	8.90253e-06	false	0.241422	0.708211	up	1.7717	8.90253e-06
LOC114290744	up	1.97333	6.26619e-32	false	-0.229156	0.364375	up	1.97333	6.26619e-32
LOC114290750	up	2.06344	1.98241e-75	false	-0.135139	0.497061	up	2.06344	1.98241e-75
LOC114290753	up	2.41342	2.79051e-240	false	0.101989	0.485164	up	2.41342	2.79051e-240
LOC114290755	up	5.17428	1.26541e-293	false	0.229198	0.171946	up	5.17428	1.26541e-293
LOC114290828	up	1.42487	7.60967e-25	false	0.439403	0.013258	up	1.42487	7.60967e-25
LOC114291001	up	1.73648	3.20688e-10	false	0.429699	0.218713	up	1.73648	3.20688e-10
LOC114291006	up	1.16213	2.39301e-09	false	-0.262716	0.475512	up	1.16213	2.39301e-09
LOC114291022	up	1.1288	2.48602e-59	false	-0.0110325	0.962213	up	1.1288	2.48602e-59
LOC114291044	up	1.29955	1.41099e-09	false	0.232327	0.497212	up	1.29955	1.41099e-09
LOC114291061	up	1.67928	3.78621e-178	false	0.325063	0.00241067	up	1.67928	3.78621e-178
LOC114291073	up	2.46016	4.17253e-05	false	-0.213682	0.784435	up	2.46016	4.17253e-05
LOC114291080	up	2.64	1.10076e-190	false	0.373303	0.00165687	up	2.64	1.10076e-190
LOC114291099	up	1.16064	0.00740134	false	-0.436584	0.459195	up	1.16064	0.00740134
LOC114291147	up	1.10818	3.85917e-93	false	0.0469715	0.800574	up	1.10818	3.85917e-93
LOC114291154	up	3.5032	3.64461e-22	false	0.267722	0.618518	up	3.5032	3.64461e-22
LOC114291227	up	1.45491	1.19463e-128	false	-0.662622	2.37696e-08	up	1.45491	1.19463e-128
LOC114291230	up	6.5635	7.50091e-162	false	0.321832	0.0762204	up	6.5635	7.50091e-162
LOC114291255	up	1.01097	0.00372128	false	-0.160119	0.783547	up	1.01097	0.00372128
LOC114291287	up	2.80012	2.53567e-68	false	0.269727	0.214597	up	2.80012	2.53567e-68
LOC114291288	up	1.37708	1.84151e-113	false	-0.469782	0.00371483	up	1.37708	1.84151e-113
LOC114291289	up	1.57075	3.35867e-272	false	-0.163403	0.198623	up	1.57075	3.35867e-272
LOC114291301	up	3.17572	0	false	0.0475497	0.784546	up	3.17572	0
LOC114291351	up	2.44324	3.97475e-24	false	0.314185	0.242201	up	2.44324	3.97475e-24
LOC114291383	up	2.31192	6.01963e-14	false	0.70199	0.0613022	up	2.31192	6.01963e-14
LOC114291617	up	1.88785	6.05777e-81	false	0.4688	0.00840361	up	1.88785	6.05777e-81
LOC114291629	up	2.58578	1.00433e-63	false	0.4959	0.0132517	up	2.58578	1.00433e-63
LOC114291646	up	1.63871	1.45246e-18	false	0.319161	0.21429	up	1.63871	1.45246e-18
LOC114291692	up	1.88805	8.30176e-44	false	0.26861	0.200108	up	1.88805	8.30176e-44
LOC114291704	up	2.25003	5.13044e-231	false	-0.143016	0.443297	up	2.25003	5.13044e-231
LOC114291708	up	3.37616	8.36415e-19	false	-0.157037	0.72459	up	3.37616	8.36415e-19
LOC114291710	up	4.42514	2.49225e-39	false	-0.0866606	0.834499	up	4.42514	2.49225e-39
LOC114291858	up	2.57806	3.61864e-34	false	0.610909	0.00624268	up	2.57806	3.61864e-34
LOC114291876	up	1.43524	0.00803761	false	0.014318	0.98945	up	1.43524	0.00803761
LOC114291915	up	1.8184	3.73614e-05	false	0.673837	0.220468	up	1.8184	3.73614e-05
LOC114291943	up	1.89476	3.4091e-05	false	0.0139706	0.987858	up	1.89476	3.4091e-05
LOC114291963	up	1.18954	5.87624e-44	false	-0.0664431	0.728421	up	1.18954	5.87624e-44
LOC114291987	up	6.11831	4.721e-300	false	0.174797	0.185872	up	6.11831	4.721e-300
LOC114292009	up	3.75599	0	false	0.822433	4.66768e-09	up	3.75599	0
LOC114292023	up	1.8567	3.1421e-42	false	-0.393371	0.121096	up	1.8567	3.1421e-42
LOC114292036	up	2.42737	5.49098e-40	false	0.200733	0.428546	up	2.42737	5.49098e-40
LOC114292046	up	1.47817	4.67077e-188	false	-0.337015	0.00425805	up	1.47817	4.67077e-188
LOC114292050	up	2.41534	1.35399e-140	false	-0.243862	0.0811009	up	2.41534	1.35399e-140
LOC114292052	up	2.1714	2.14964e-71	false	0.518431	0.0346136	up	2.1714	2.14964e-71
LOC114292067	up	2.05162	1.4939e-50	false	0.448293	0.0062207	up	2.05162	1.4939e-50
LOC114292072	up	2.75158	7.88928e-12	false	0.50367	0.287648	up	2.75158	7.88928e-12
LOC114292110	up	2.46144	1.65553e-57	false	0.386726	0.0244081	up	2.46144	1.65553e-57
LOC114294670	up	3.87076	5.73264e-40	up	1.84444	1.72287e-13	up	3.87076	5.73264e-40
LOC114292166	up	2.23341	1.00538e-280	false	0.452784	3.87259e-06	up	2.23341	1.00538e-280
LOC114292246	up	2.84337	2.71302e-67	false	0.574973	0.0043488	up	2.84337	2.71302e-67
LOC114292247	up	6.13239	9.99923e-271	false	0.306494	0.0491244	up	6.13239	9.99923e-271
LOC114292311	up	1.85686	5.82748e-38	false	0.106184	0.720873	up	1.85686	5.82748e-38
LOC114292315	up	2.73394	3.16572e-71	false	0.519463	0.00128465	up	2.73394	3.16572e-71
LOC114294676	up	3.78736	1.43506e-20	up	1.37047	1.11924e-05	up	3.78736	1.43506e-20
LOC114292336	up	1.34852	3.46128e-20	false	0.338796	0.17901	up	1.34852	3.46128e-20
LOC114294716	up	10.1456	7.5558e-17	up	1.41062	4.93071e-06	up	10.1456	7.5558e-17
LOC114292381	up	1.22984	1.28177e-46	false	-0.0799392	0.685224	up	1.22984	1.28177e-46
LOC114292406	up	1.26959	1.32709e-27	false	0.112529	0.647035	up	1.26959	1.32709e-27
LOC114295325	up	5.30841	7.00857e-34	up	2.16889	1.22596e-13	up	5.30841	7.00857e-34
LOC114292495	up	4.26182	0	false	0.906659	5.22442e-15	up	4.26182	0
LOC114292516	up	1.93784	1.05173e-103	false	0.326607	0.0127299	up	1.93784	1.05173e-103
LOC114292517	up	3.69259	0	false	0.649764	2.29278e-08	up	3.69259	0
LOC114292535	up	1.1681	0.00881643	false	-0.412109	0.599296	up	1.1681	0.00881643
LOC114292547	up	1.20419	3.59067e-122	false	-0.143194	0.385731	up	1.20419	3.59067e-122
LOC114292569	up	2.21043	3.12091e-31	false	0.147557	0.665222	up	2.21043	3.12091e-31
LOC114292577	up	2.22144	0	false	-0.0861524	0.670186	up	2.22144	0
LOC114292596	up	1.72792	5.44869e-07	false	-0.139341	0.804693	up	1.72792	5.44869e-07
LOC114292661	up	1.54657	1.03389e-131	false	0.0713856	0.774685	up	1.54657	1.03389e-131
LOC114292679	up	2.38798	4.47773e-300	false	0.0736071	0.775513	up	2.38798	4.47773e-300
LOC114292727	up	1.90606	2.57209e-224	false	0.0333595	0.865641	up	1.90606	2.57209e-224
LOC114292731	up	1.93155	3.89255e-14	false	0.752969	0.00904951	up	1.93155	3.89255e-14
LOC114292741	up	1.17008	4.17832e-06	false	0.149869	0.732256	up	1.17008	4.17832e-06
LOC114292747	up	3.34548	9.32468e-168	false	0.348487	0.0197489	up	3.34548	9.32468e-168
LOC114292748	up	1.36928	3.5515e-58	false	-0.0357029	0.900428	up	1.36928	3.5515e-58
LOC114295534	up	5.89918	1.31968e-130	up	1.17014	4.73361e-17	up	5.89918	1.31968e-130
LOC114292800	up	3.49862	7.64161e-09	false	-0.101809	0.913062	up	3.49862	7.64161e-09
LOC114295978	up	3.74568	0	up	1.90339	6.68928e-44	up	3.74568	0
LOC114292831	up	2.80444	0	false	0.686361	2.02549e-07	up	2.80444	0
LOC114292855	up	1.96105	5.38253e-211	false	-0.45425	0.325444	up	1.96105	5.38253e-211
LOC114292883	up	1.84228	3.234e-21	false	0.568662	0.0132457	up	1.84228	3.234e-21
LOC114292905	up	1.998	1.7352e-33	false	0.650274	0.00214579	up	1.998	1.7352e-33
LOC114292913	up	2.84533	1.2745e-06	false	0.18856	0.830252	up	2.84533	1.2745e-06
LOC114292943	up	1.3483	1.32637e-05	false	0.283541	0.554681	up	1.3483	1.32637e-05
LOC114292947	up	4.58072	0	false	0.93555	3.6397e-19	up	4.58072	0
LOC114292960	up	1.4498	3.27423e-19	false	-0.0628356	0.858906	up	1.4498	3.27423e-19
LOC114292961	up	1.26462	8.13723e-15	false	0.187535	0.464952	up	1.26462	8.13723e-15
LOC114292973	up	1.16017	0.00725528	false	0.0839184	0.920806	up	1.16017	0.00725528
LOC114293042	up	1.79259	2.95139e-82	false	-0.0549489	0.815591	up	1.79259	2.95139e-82
LOC114293046	up	1.38876	2.81963e-111	false	-0.213582	0.339421	up	1.38876	2.81963e-111
LOC114293066	up	1.79427	7.0677e-10	false	-0.207017	0.608728	up	1.79427	7.0677e-10
LOC114293067	up	1.54252	1.16104e-140	false	0.425976	0.000721543	up	1.54252	1.16104e-140
LOC114293068	up	3.25162	3.85697e-12	false	0.266899	0.639271	up	3.25162	3.85697e-12
LOC114293069	up	1.65464	1.33486e-46	false	-0.367984	0.0310002	up	1.65464	1.33486e-46
LOC114293091	up	2.12985	1.96418e-24	false	-0.317199	0.325958	up	2.12985	1.96418e-24
LOC114293101	up	3.02339	1.8248e-96	false	-0.0200618	0.945787	up	3.02339	1.8248e-96
LOC114293103	up	3.33237	1.9276e-196	false	0.708842	2.38586e-09	up	3.33237	1.9276e-196
LOC114293158	up	1.48003	3.35191e-77	false	-0.425744	0.000498459	up	1.48003	3.35191e-77
LOC114293190	up	3.20056	1.62329e-302	false	0.40329	0.000151952	up	3.20056	1.62329e-302
LOC114293192	up	2.39286	1.07287e-27	false	0.379591	0.133376	up	2.39286	1.07287e-27
LOC114293197	up	1.37644	4.77748e-43	false	0.311043	0.0255677	up	1.37644	4.77748e-43
LOC114296016	up	2.29276	2.36203e-25	up	1.19587	2.43509e-07	up	2.29276	2.36203e-25
LOC114293246	up	1.15688	2.91455e-32	false	0.0241856	0.92093	up	1.15688	2.91455e-32
LOC114293248	up	3.09982	3.66171e-55	false	0.78657	1.75286e-05	up	3.09982	3.66171e-55
LOC114293251	up	1.04831	3.65795e-12	false	-0.614422	5.54544e-05	up	1.04831	3.65795e-12
LOC114293253	up	1.29465	1.71351e-07	false	0.1743	0.888419	up	1.29465	1.71351e-07
LOC114293254	up	1.77398	1.3904e-192	false	-0.039944	0.867356	up	1.77398	1.3904e-192
LOC114293257	up	1.16816	2.51049e-07	false	-0.944627	8.47754e-07	up	1.16816	2.51049e-07
LOC114293275	up	1.32515	5.07923e-18	false	-0.0840963	0.787823	up	1.32515	5.07923e-18
LOC114293280	up	1.91985	0.000904961	false	0.357213	0.412175	up	1.91985	0.000904961
LOC114293294	up	6.23916	0	false	0.557424	3.53059e-06	up	6.23916	0
LOC114293298	up	2.13421	1.0035e-64	false	0.324733	0.0980295	up	2.13421	1.0035e-64
LOC114293314	up	1.72497	4.25217e-108	false	0.611398	5.18299e-08	up	1.72497	4.25217e-108
LOC114296144	up	3.54217	2.8571e-77	up	1.29049	8.06366e-14	up	3.54217	2.8571e-77
LOC114293321	up	3.22596	5.21262e-162	false	0.969886	5.50344e-14	up	3.22596	5.21262e-162
LOC114293323	up	2.07477	1.98467e-08	false	0.409611	0.404824	up	2.07477	1.98467e-08
LOC114293359	up	4.07455	1.37214e-72	false	0.61155	0.00135629	up	4.07455	1.37214e-72
LOC114293430	up	1.23861	3.1602e-31	false	-0.0532983	0.814472	up	1.23861	3.1602e-31
LOC114293432	up	1.83665	1.8094e-75	false	0.160684	0.313521	up	1.83665	1.8094e-75
LOC114293453	up	5.04821	0	false	-0.279405	0.0255049	up	5.04821	0
LOC114296372	up	4.23353	2.10176e-54	up	1.19906	1.03704e-08	up	4.23353	2.10176e-54
LOC114293456	up	1.38792	5.94295e-13	false	-0.105453	0.815145	up	1.38792	5.94295e-13
LOC114293457	up	1.59968	1.49981e-10	false	0.550338	0.0776029	up	1.59968	1.49981e-10
LOC114293514	up	1.94867	1.39759e-07	false	0.140602	0.808848	up	1.94867	1.39759e-07
LOC114293518	up	2.06669	9.62788e-16	false	0.295602	0.423281	up	2.06669	9.62788e-16
LOC114293519	up	6.41459	1.14902e-12	false	0.712829	0.0569935	up	6.41459	1.14902e-12
LOC114293529	up	1.2699	2.32658e-84	false	0.174542	0.22878	up	1.2699	2.32658e-84
LOC114293532	up	2.23366	2.15829e-06	false	0.388936	0.502482	up	2.23366	2.15829e-06
LOC114293534	up	2.9275	4.11999e-122	false	-0.298097	0.053853	up	2.9275	4.11999e-122
LOC114293546	up	1.858	3.45652e-16	false	-0.626883	0.00457913	up	1.858	3.45652e-16
LOC114293559	up	2.37154	2.00263e-189	false	0.425116	0.000129837	up	2.37154	2.00263e-189
LOC114293562	up	2.66797	5.00206e-05	false	-0.84194	0.0961423	up	2.66797	5.00206e-05
LOC114293649	up	4.06836	1.21814e-100	false	0.833111	1.56858e-06	up	4.06836	1.21814e-100
LOC114293654	up	1.62883	1.28587e-29	false	-0.464323	0.0338978	up	1.62883	1.28587e-29
LOC114296656	up	5.47734	3.37812e-11	up	1.30373	0.0047528	up	5.47734	3.37812e-11
LOC114296698	up	4.94415	1.49644e-16	up	1.09324	0.00427454	up	4.94415	1.49644e-16
LOC114293703	up	3.46929	3.86269e-18	false	0.423698	0.293127	up	3.46929	3.86269e-18
LOC114293704	up	1.96921	2.24039e-18	false	0.389152	0.210887	up	1.96921	2.24039e-18
LOC114297295	up	5.74077	0	up	1.0352	7.43244e-25	up	5.74077	0
LOC114293751	up	2.37321	7.84599e-42	false	-0.244124	0.271938	up	2.37321	7.84599e-42
LOC114293766	up	3.9943	3.61673e-286	false	0.662588	7.73114e-09	up	3.9943	3.61673e-286
LOC114293768	up	1.80697	4.63227e-44	false	-0.0794098	0.744829	up	1.80697	4.63227e-44
LOC114293807	up	8.35834	6.26705e-160	false	0.762823	1.88139e-12	up	8.35834	6.26705e-160
LOC114297299	up	2.85971	6.01399e-33	up	1.22657	3.93096e-08	up	2.85971	6.01399e-33
LOC114293844	up	1.47246	9.97368e-09	false	-0.694153	0.0042317	up	1.47246	9.97368e-09
LOC114293857	up	2.00031	1.18549e-09	false	0.175612	0.716545	up	2.00031	1.18549e-09
LOC114293958	up	1.6559	4.01491e-24	false	0.630465	0.00245264	up	1.6559	4.01491e-24
LOC114293978	up	3.71148	4.45739e-81	false	0.819551	8.3165e-07	up	3.71148	4.45739e-81
LOC114293993	up	2.17912	1.0917e-63	false	-0.0610194	0.815011	up	2.17912	1.0917e-63
LOC114293997	up	2.4348	1.41179e-35	false	0.714531	0.000352972	up	2.4348	1.41179e-35
LOC114294009	up	3.87035	0	false	0.443367	0.0115773	up	3.87035	0
LOC114297307	up	4.49039	1.45639e-263	up	1.70172	1.55048e-29	up	4.49039	1.45639e-263
LOC114294067	up	1.7702	1.1139e-59	false	0.187026	0.357847	up	1.7702	1.1139e-59
LOC114294070	up	1.20522	8.6143e-06	false	0.172657	0.715382	up	1.20522	8.6143e-06
LOC114294088	up	1.96654	3.18029e-05	false	-0.348297	0.617526	up	1.96654	3.18029e-05
LOC114294095	up	1.23902	8.45402e-27	false	-0.237624	0.156706	up	1.23902	8.45402e-27
LOC114294117	up	1.98933	4.72333e-60	false	0.330384	0.0357192	up	1.98933	4.72333e-60
LOC114298040	up	3.77646	1.92987e-134	up	1.44132	9.24477e-25	up	3.77646	1.92987e-134
LOC114298050	up	3.2543	2.47282e-24	up	1.06785	0.0025426	up	3.2543	2.47282e-24
LOC114294269	up	2.22184	8.77856e-138	false	0.43663	0.000110211	up	2.22184	8.77856e-138
LOC114294283	up	4.99066	5.81539e-111	false	0.921323	3.30693e-10	up	4.99066	5.81539e-111
LOC114294333	up	2.05139	1.56498e-20	false	-0.364177	0.126596	up	2.05139	1.56498e-20
LOC114298590	up	8.85402	0	up	1.38661	7.64174e-29	up	8.85402	0
LOC114294340	up	3.47036	0	false	-0.144232	0.291413	up	3.47036	0
LOC114294357	up	1.09954	0.0338992	false	-0.0829781	0.930597	up	1.09954	0.0338992
LOC114294364	up	1.54332	1.32526e-05	false	-0.41651	0.315835	up	1.54332	1.32526e-05
LOC114294390	up	4.91563	1.40468e-36	false	0.253925	0.47405	up	4.91563	1.40468e-36
LOC114294394	up	1.19723	6.97688e-40	false	-0.243562	0.0924488	up	1.19723	6.97688e-40
LOC114294422	up	2.914	2.34739e-70	false	-0.334035	0.0426523	up	2.914	2.34739e-70
LOC114294432	up	3.00956	5.4329e-143	false	0.572334	3.42425e-05	up	3.00956	5.4329e-143
LOC114298736	up	2.14326	7.28431e-130	up	1.06454	6.57338e-14	up	2.14326	7.28431e-130
LOC114294486	up	2.8015	6.53826e-10	false	0.0721272	0.918517	up	2.8015	6.53826e-10
LOC114294497	up	1.86394	0	false	0.565424	3.11425e-10	up	1.86394	0
LOC114294502	up	6.88781	4.98174e-76	false	0.886015	3.64501e-10	up	6.88781	4.98174e-76
LOC114294557	up	3.02878	4.86482e-10	false	0.220932	0.795507	up	3.02878	4.86482e-10
LOC114294561	up	1.08216	3.45372e-06	false	-0.0269881	0.954127	up	1.08216	3.45372e-06
LOC114294567	up	3.65454	2.46998e-10	false	0.222854	0.739442	up	3.65454	2.46998e-10
LOC114294596	up	1.79738	6.1777e-226	false	-0.293521	0.637541	up	1.79738	6.1777e-226
LOC114298861	up	4.09769	4.69584e-285	up	2.12841	8.20697e-69	up	4.09769	4.69584e-285
LOC114299172	up	2.81502	1.45583e-12	up	1.17867	0.00427607	up	2.81502	1.45583e-12
LOC114299173	up	5.16217	1.23563e-75	up	3.06451	5.55247e-47	up	5.16217	1.23563e-75
LOC114294840	up	2.14921	1.87045e-240	false	0.377813	0.000136763	up	2.14921	1.87045e-240
LOC114294845	up	8.92508	0	false	0.983208	2.84824e-18	up	8.92508	0
LOC114294849	up	4.24393	0	false	0.658554	2.21329e-10	up	4.24393	0
LOC114294860	up	1.14083	4.84932e-30	false	0.0521772	0.83326	up	1.14083	4.84932e-30
LOC114294862	up	2.11495	6.46243e-08	false	-0.497199	0.234846	up	2.11495	6.46243e-08
LOC114294875	up	2.70036	3.6778e-149	false	0.167623	0.271441	up	2.70036	3.6778e-149
LOC114294882	up	1.89001	1.56735e-168	false	-0.326743	0.00855965	up	1.89001	1.56735e-168
LOC114294900	up	1.54004	5.24852e-11	false	0.0548145	0.900679	up	1.54004	5.24852e-11
LOC114294929	up	4.74101	7.68142e-28	false	-0.380005	0.212495	up	4.74101	7.68142e-28
LOC114294942	up	1.39984	1.74912e-27	false	0.139256	0.591374	up	1.39984	1.74912e-27
LOC114294973	up	1.83697	4.63265e-28	false	0.349964	0.168912	up	1.83697	4.63265e-28
LOC114295042	up	1.52496	6.9908e-79	false	0.415666	0.000588269	up	1.52496	6.9908e-79
LOC114295076	up	1.5854	2.05104e-187	false	0.452187	0.0061655	up	1.5854	2.05104e-187
LOC114295106	up	2.29218	4.24827e-72	false	-0.15324	0.409063	up	2.29218	4.24827e-72
LOC114295121	up	1.80877	0.000177561	false	0.307779	0.692312	up	1.80877	0.000177561
LOC114295144	up	1.07462	0.00630001	false	-0.470155	0.487917	up	1.07462	0.00630001
LOC114295159	up	2.31151	2.32078e-77	false	0.411587	0.00704897	up	2.31151	2.32078e-77
LOC114295165	up	1.65954	8.52289e-119	false	0.189782	0.15509	up	1.65954	8.52289e-119
LOC114295171	up	1.39151	7.87726e-23	false	0.372657	0.0589701	up	1.39151	7.87726e-23
LOC114295218	up	2.92166	0	false	0.342341	0.000751366	up	2.92166	0
LOC114295232	up	1.78142	2.99464e-07	false	0.574455	0.183551	up	1.78142	2.99464e-07
LOC114295264	up	2.17714	2.53225e-06	false	-0.419365	0.456185	up	2.17714	2.53225e-06
LOC114295294	up	8.48247	0	false	0.196932	0.142655	up	8.48247	0
LOC114295313	up	1.63072	7.12559e-132	false	0.104807	0.492817	up	1.63072	7.12559e-132
LOC114299174	up	2.48046	9.53602e-13	up	1.21777	0.00150719	up	2.48046	9.53602e-13
LOC114295387	up	2.63865	1.36106e-118	false	0.672178	5.5063e-07	up	2.63865	1.36106e-118
LOC114295443	up	1.02579	2.74657e-40	false	0.0383271	0.868106	up	1.02579	2.74657e-40
LOC114295456	up	1.38982	1.16634e-89	false	0.0448245	0.795413	up	1.38982	1.16634e-89
LOC114295467	up	2.16653	1.9051e-32	false	0.491191	0.0319366	up	2.16653	1.9051e-32
LOC114295499	up	1.31803	3.23006e-15	false	0.129829	0.700195	up	1.31803	3.23006e-15
LOC114295514	up	2.42828	0	false	0.673059	7.92591e-13	up	2.42828	0
LOC114295532	up	3.55405	0	false	0.471897	6.18656e-05	up	3.55405	0
LOC114299178	up	6.1614	4.29173e-42	up	3.04703	9.71404e-35	up	6.1614	4.29173e-42
LOC114295548	up	1.6877	7.84021e-26	false	0.598229	0.00250827	up	1.6877	7.84021e-26
LOC114295581	up	2.0817	0.00168926	false	0.073802	0.949534	up	2.0817	0.00168926
LOC114295710	up	1.08675	0.00487365	false	-0.376533	0.491325	up	1.08675	0.00487365
LOC114295718	up	2.10252	2.81981e-106	false	0.565866	1.36925e-05	up	2.10252	2.81981e-106
LOC114295759	up	1.4428	4.65893e-16	false	0.19292	0.535914	up	1.4428	4.65893e-16
LOC114295761	up	3.07394	0	false	0.0769983	0.581682	up	3.07394	0
LOC114295769	up	1.33702	3.21386e-46	false	0.118385	0.513118	up	1.33702	3.21386e-46
LOC114295844	up	3.43058	8.01894e-27	false	0.16283	0.402418	up	3.43058	8.01894e-27
LOC114295855	up	5.1137	0	false	0.848513	7.35363e-10	up	5.1137	0
LOC114295879	up	1.62732	6.81285e-09	false	-0.414075	0.194217	up	1.62732	6.81285e-09
LOC114295888	up	2.16413	1.68545e-240	false	-0.328812	0.0013465	up	2.16413	1.68545e-240
LOC114295893	up	6.91138	1.64772e-19	false	0.0725809	0.858291	up	6.91138	1.64772e-19
LOC114299180	up	5.3809	0	up	1.11879	1.04234e-39	up	5.3809	0
LOC114299230	up	6.19359	8.13832e-89	up	1.80422	0.000544921	up	6.19359	8.13832e-89
LOC114296023	up	1.14769	9.12709e-81	false	0.101189	0.551905	up	1.14769	9.12709e-81
LOC114296056	up	1.63836	1.11081e-11	false	-0.160754	0.698737	up	1.63836	1.11081e-11
LOC114296069	up	4.90105	1.36791e-19	false	0.0362136	0.945948	up	4.90105	1.36791e-19
LOC114296103	up	1.175	0.000224998	false	-0.167047	0.74731	up	1.175	0.000224998
LOC114296109	up	1.48725	5.27983e-60	false	0.343668	0.0308519	up	1.48725	5.27983e-60
LOC114296118	up	6.493	0	false	0.218089	0.332972	up	6.493	0
LOC114296137	up	2.34348	2.63553e-124	false	0.180865	0.471965	up	2.34348	2.63553e-124
LOC114300458	up	5.16949	6.3668e-54	up	1.06714	2.05458e-07	up	5.16949	6.3668e-54
LOC114296146	up	1.94083	2.15774e-259	false	0.624503	1.11748e-10	up	1.94083	2.15774e-259
LOC114296147	up	2.75759	5.82489e-19	false	0.141876	0.744309	up	2.75759	5.82489e-19
LOC114296151	up	1.26045	7.45335e-63	false	0.137049	0.459698	up	1.26045	7.45335e-63
LOC114296168	up	1.70945	2.79443e-21	false	0.260548	0.303084	up	1.70945	2.79443e-21
LOC114296175	up	2.14251	5.37207e-53	false	0.194342	0.388842	up	2.14251	5.37207e-53
LOC114296200	up	1.39714	1.46252e-70	false	0.00934636	0.973543	up	1.39714	1.46252e-70
LOC114296300	up	1.40305	0.0296783	false	-0.664374	0.455044	up	1.40305	0.0296783
LOC114296304	up	1.94861	7.82293e-09	false	0.0145941	0.982005	up	1.94861	7.82293e-09
LOC114300480	up	6.99325	1.0149e-264	up	1.48681	6.64484e-42	up	6.99325	1.0149e-264
LOC114296373	up	1.64885	2.28933e-38	false	-0.0887168	0.744264	up	1.64885	2.28933e-38
LOC114296397	up	4.13851	3.52739e-120	false	0.831159	6.0148e-07	up	4.13851	3.52739e-120
LOC114296399	up	3.90047	0	false	0.425659	9.3156e-05	up	3.90047	0
LOC114296458	up	1.32538	0.000355463	false	0.0994762	0.874742	up	1.32538	0.000355463
LOC114296463	up	2.4594	1.59432e-38	false	-0.216174	0.401573	up	2.4594	1.59432e-38
LOC114296518	up	2.66018	0	false	0.715735	7.67687e-17	up	2.66018	0
LOC114296537	up	1.6905	6.37751e-27	false	0.592683	0.00139068	up	1.6905	6.37751e-27
LOC114296551	up	7.06402	1.39731e-15	false	-0.0442436	0.923882	up	7.06402	1.39731e-15
LOC114296552	up	1.92779	8.56977e-05	false	0.429356	0.519958	up	1.92779	8.56977e-05
LOC114296604	up	2.65077	2.12434e-11	false	-0.0853739	0.880351	up	2.65077	2.12434e-11
LOC114296612	up	1.09359	3.58369e-32	false	-0.270627	0.0572674	up	1.09359	3.58369e-32
LOC114296629	up	1.99905	1.63937e-06	false	0.0400444	0.957176	up	1.99905	1.63937e-06
LOC114296634	up	2.6836	9.70183e-85	false	0.2561	0.158683	up	2.6836	9.70183e-85
LOC114300536	up	3.43882	5.50052e-53	up	1.85415	1.29502e-17	up	3.43882	5.50052e-53
LOC114296659	up	2.26091	1.03836e-07	false	0.289233	0.618136	up	2.26091	1.03836e-07
[truncated: 11,796 more rows]

## Sheet: Stable6
Supplementary Table 6. DEGs involved in aroma-related biosynthesis pathway
Gene ID	Gene name	Description	Bd(FPKM)	Ib(FPKM)	Fb(FPKM)
LOC114263578	ACAT1	acetyl-CoA acetyltransferase	9.7361	4.0586	3.1431
LOC114301807	ACAT2	acetyl-CoA acetyltransferase	0.9313	0.8461	1.6301
LOC114313068	ACAT3	acetyl-CoA acetyltransferase	165.431	63.7441	61.1037
LOC114318929	ACAT4	acetyl-CoA acetyltransferase	18.1189	7.6667	4.3001
novel.6815	ACAT5	acetyl-CoA acetyltransferase	2.0141	0.4469	0.9412
novel.7010	ACAT6	acetyl-CoA acetyltransferase	5.4535	1.7491	1.6085
LOC114266569	HMGS1	hydroxymethylglutaryl-CoA synthase	121.907	53.4658	38.1284
LOC114297029	HMGS2	hydroxymethylglutaryl-CoA synthase	6.6498	2.9906	2.4423
LOC114260730	HMGR1	3-hydroxy-3-methylglutaryl-coenzyme A reductase	10.5598	3.2926	1.7573
LOC114310350	HMGR2	3-hydroxy-3-methylglutaryl-coenzyme A reductase	80.3499	191.268	160.269
LOC114313128	HMGR3	3-hydroxy-3-methylglutaryl-coenzyme A reductase	106.405	96.1752	52.845
LOC114314342	HMGR4	3-hydroxy-3-methylglutaryl-coenzyme A reductase	83.1167	47.5301	10.3425
novel.3755	HMGR5	3-hydroxy-3-methylglutaryl-coenzyme A reductase	21.9876	1.6146	1.2945
LOC114278875	HMGR6	3-hydroxy-3-methylglutaryl-coenzyme A reductase	63.0107	1.2895	0.2714
LOC114283426	HMGR7	3-hydroxy-3-methylglutaryl-coenzyme A reductase	6.9276	31.2174	30.4008
LOC114302980	PMK	phosphomevalonate kinase	27.6475	8.1593	1.9396
LOC114261339	MVD	diphosphomevalonate decarboxylase	96.7908	70.7499	47.345
LOC114303254	FPPS1	farnesyl diphosphate synthase	128.291	55.2858	36.5612
LOC114304218	FPPS2	farnesyl diphosphate synthase	34.7945	10.5523	7.5075
LOC114303809	DXS1	1-deoxy-D-xylulose-5-phosphate synthase	3.8071	0.3661	0.2674
LOC114275769	DXS2	1-deoxy-D-xylulose-5-phosphate synthase	4.4151	0.8566	1.4604
LOC114301937	DXS3	1-deoxy-D-xylulose-5-phosphate synthase	15.6605	146.572	182.775
LOC114309241	DXS4	1-deoxy-D-xylulose-5-phosphate synthase	3.5344	0.3216	0.3614
LOC114264886	DXS5	1-deoxy-D-xylulose-5-phosphate synthase	40.6992	147.135	237.679
LOC114269705	DXS6	1-deoxy-D-xylulose-5-phosphate synthase	14.6134	48.8788	63.2697
LOC114304411	DXS7	1-deoxy-D-xylulose-5-phosphate synthase	1.2508	0.127	0.1877
LOC114259865	DXR	1-deoxy-D-xylulose 5-phosphate reductoisomerase	90.1569	154.846	104.112
novel.8685	MCT	2-C-methyl-D-erythritol 4-phosphate cytidylyltransferase	3.662	7.1863	5.4437
LOC114261498	ISPF1	2-C-methyl-D-erythritol 2,4-cyclodiphosphate synthase	0.3857	2.1492	3.1846
LOC114279313	ISPF2	2-C-methyl-D-erythritol 2,4-cyclodiphosphate synthase	41.8502	161.463	118.766
LOC114306092	HDR	4-hydroxy-3-methylbut-2-en-1-yl diphosphate reductase	113.677	241.164	234.089
LOC114315105	GPPS1	geranylgeranyl diphosphate synthase, type II	62.7268	6.0102	3.1814
LOC114261021	GPPS2	geranylgeranyl diphosphate synthase, type II	15.2014	18.5604	25.9803
LOC114271518	NMDH1	(+)-neomenthol dehydrogenase	0.7877	1.4099	1.1042
LOC114298051	NMDH2	(+)-neomenthol dehydrogenase	4.59517	1.91557	1.72667
LOC114319976	NMDH3	(+)-neomenthol dehydrogenase	12.2944	3.177	3.07017
LOC114261720	NMDH4	(+)-neomenthol dehydrogenase	14.942	6.95507	3.23783
LOC114298055	NMDH5	(+)-neomenthol dehydrogenase	4.4522	1.26187	2.1979
LOC114319962	NMDH6	(+)-neomenthol dehydrogenase	7.44973	3.21363	2.54323
novel.1568	LIS1	R-linalool synthase	1.51147	52.5538	132.147
novel.520	LIS2	R-linalool synthase	2.951	0.8307	1.01533
novel.6469	LIS3	R-linalool synthase	8.67303	3.66173	3.1982
novel.9921	LIS4	R-linalool synthase	0.4104	18.1553	18.2959
LOC114302580	ATPN1	(+)-alpha-terpineol	6.094	0.5607	1.1273
LOC114302023	ATPN2	(+)-alpha-terpineol	11.9841	1.81857	2.26137
LOC114261817	BAS1	beta-amyrin synthase	2.31843	42.2369	51.3946
LOC114265759	BAS2	beta-amyrin synthase	36.914	3.77393	6.72223
LOC114286770	BAS3	beta-amyrin synthase	6.11647	0.940833	1.854
LOC114265761	BAS4	beta-amyrin synthase	4.88673	0.3502	0.712133
LOC114269604	GERD1	(-)-germacrene D synthase	0.182667	3.68973	7.41913
LOC114311276	GERD2	(-)-germacrene D synthase	0.0829333	13.2596	22.4748
LOC114277960	GERD3	(-)-germacrene D synthase	0.4297	0.653433	3.90887
LOC114275185	GERD4	(-)-germacrene D synthase	4.38747	0.964467	0.683667
novel.10053	GERD5	(-)-germacrene D synthase	0.06	7.6401	10.2655
LOC114290333	NES1	(3S,6E)-nerolidol synthase	0.524867	12.0441	27.7957
LOC114261430	NES2	(3S,6E)-nerolidol synthase	0.278333	4.10373	8.0205
LOC114285151	NES3	(3S,6E)-nerolidol synthase	0.0769667	1.17363	2.4418
LOC114276125	GGPS1	geranylgeranyl diphosphate synthase, type III	98.6481	33.3757	8.2066
LOC114290362	GGPS2	geranylgeranyl diphosphate synthase, type III	18.2515	1.8583	0.7371
LOC114313499	GGPS3	geranylgeranyl diphosphate synthase, type III	15.6667	4.4845	1.9213
LOC114311220	GGPS4	geranylgeranyl diphosphate synthase, type III	2.66	2.1851	1.5677
LOC114307007	GGPS5	geranylgeranyl diphosphate synthase, type III	5.3203	11.5435	11.4847
LOC114283523	CSE1	caffeoylshikimate esterase	7.66563	1.19013	0.582067
LOC114303752	CSE2	caffeoylshikimate esterase	0.378133	1.18307	2.48867
LOC114302378	CSE3	caffeoylshikimate esterase	6.77647	14.9191	10.7097
LOC114285116	CSE4	caffeoylshikimate esterase	30.3199	171.129	103.401
LOC114258943	COMT1	K13066 caffeic acid 3-O-methyltransferase / acetylserotonin O-methyltransferase [EC:2.1.1.68 2.1.1.4] | (RefSeq) caffeic acid 3-O-methyltransferase-like (A)	27.271	88.0826	120.629
LOC114299270	COMT2	K13066 caffeic acid 3-O-methyltransferase / acetylserotonin O-methyltransferase [EC:2.1.1.68 2.1.1.4] | (RefSeq) caffeic acid 3-O-methyltransferase-like (A)	3.37913	8.13967	14.5605
LOC114319246	COMT3	K13066 caffeic acid 3-O-methyltransferase / acetylserotonin O-methyltransferase [EC:2.1.1.68 2.1.1.4] | (RefSeq) caffeic acid 3-O-methyltransferase (A)	155.61	577.493	1387.47
LOC114258632	SHT1	spermidine hydroxycinnamoyl transferase	5.53283	10.3242	7.52717
novel.1326	SHT2	spermidine hydroxycinnamoyl transferase	5.53777	2.82847	1.51977
LOC114271713	HCT1	shikimate O-hydroxycinnamoyltransferase	0.2438	0.542133	0.833067
LOC114283064	HCT2	shikimate O-hydroxycinnamoyltransferase	12.1448	25.6481	21.0927
LOC114288703	HCT3	shikimate O-hydroxycinnamoyltransferase	49.6108	7.06543	0.941867
LOC114305146	HCT4	shikimate O-hydroxycinnamoyltransferase	126.622	36.6073	5.39933
LOC114310244	HCT5	shikimate O-hydroxycinnamoyltransferase	36.4379	60.6116	75.2687
LOC114319859	HCT6	shikimate O-hydroxycinnamoyltransferase	65.3604	17.0766	2.13017
LOC114282324	REF1-1	coniferyl-aldehyde dehydrogenase	19.5887	79.1464	87.6116
LOC114288093	REF1-2	coniferyl-aldehyde dehydrogenase	63.4321	211.83	242.524
LOC114273057	PAL1	phenylalanine ammonia-lyase	15.3495	9.94953	29.6477
LOC114308066	PAL2	phenylalanine ammonia-lyase	291.321	269.024	528.533
LOC114309513	PAL3	phenylalanine ammonia-lyase	70.4916	0.976867	0.613833
LOC114262497	PAL4	phenylalanine ammonia-lyase	24.4853	166.495	203.578
LOC114304006	PAL5	phenylalanine ammonia-lyase	1.26893	9.50353	9.28983
LOC114269233	PAL6	phenylalanine ammonia-lyase	130.51	8.6152	6.7709
LOC114264873	CYP84A	cytochrome P450 84A1	1.22807	0.559833	0.154633
LOC114296006	CYP84A	cytochrome P450 84A1	0.905467	0.9948	1.50523
LOC114304830	CYP84A	cytochrome P450 84A1	0.554367	0.1704	0.105867
LOC114303480	CYP98A	cytochrome P450 98A2	6.25797	12.7725	12.195
LOC114303482	CYP98A	cytochrome P450 98A2	43.8102	74.569	64.5402
LOC114261673	CCR1	cinnamoyl-CoA reductase	9.1167	3.10417	2.6287
LOC114274786	CCR2	cinnamoyl-CoA reductase	10.0422	1.67583	0.644533
LOC114280341	CCR3	cinnamoyl-CoA reductase	1.98263	0.871167	0.7029
LOC114285511	CCR4	cinnamoyl-CoA reductase	28.6859	1.00697	0.323033
LOC114288917	CCR5	cinnamoyl-CoA reductase	3.74693	1.837	0.482233
LOC114292363	CCR6	cinnamoyl-CoA reductase	34.0367	1.24257	1.4621
LOC114296164	CCR7	cinnamoyl-CoA reductase	6.51097	2.45483	1.83767
LOC114300830	CCR8	cinnamoyl-CoA reductase	11.6611	4.20667	3.77677
LOC114301653	CCR9	cinnamoyl-CoA reductase	10.1617	3.12573	4.9211
LOC114302292	CCR10	cinnamoyl-CoA reductase	18.8205	0.389333	0.723767
LOC114310545	CCR11	cinnamoyl-CoA reductase	28.6077	7.377	7.64553
LOC114314337	CCR12	cinnamoyl-CoA reductase	2.28797	0.3985	0.745833
LOC114322596	CCR13	cinnamoyl-CoA reductase	124.153	2.97073	3.3221
LOC114323776	CCR14	cinnamoyl-CoA reductase	12.8255	5.8422	1.89057
novel.6966	CCR15	cinnamoyl-CoA reductase	3.13793	1.05557	1.19007
LOC114273413	4CL1	4-coumarate--CoA ligase	5.817	9.70533	22.4881
LOC114304798	4CL2	4-coumarate--CoA ligase	16.3345	8.86787	4.79113
LOC114316137	4CL3	4-coumarate--CoA ligase	39.7957	41.7457	17.7044
LOC114311490	4CL4	4-coumarate--CoA ligase	1.93273	259.763	467.584
novel.12756	4CL5	4-coumarate--CoA ligase	0.146667	52.6961	72.5419
novel.5745	4CL6	4-coumarate--CoA ligase	0.169867	23.2108	47.8682
LOC114280551	4CL7	4-coumarate--CoA ligase	45.1978	6.10033	6.06253
LOC114257011	4CL8	4-coumarate--CoA ligase	245.308	30.9255	39.944
LOC114265165	CAMT1	caffeoyl-CoA O-methyltransferase	7.46653	2.0977	2.41477
LOC114265740	CAMT2	caffeoyl-CoA O-methyltransferase	56.8669	55.7313	108.986
LOC114288944	C4H1	trans-cinnamate 4-monooxygenase	157.845	5.09347	5.2574
LOC114260674	C4H2	trans-cinnamate 4-monooxygenase	346.336	5.1659	6.09733
LOC114305594	POD1	peroxidase	0.6177	0.490767	3.52383
LOC114319657	POD2	peroxidase	1.1062	0.3662	4.32657
LOC114267042	POD3	peroxidase	44.1555	954.959	713.077
LOC114315272	POD4	peroxidase	0.263867	1.03983	2.5087
LOC114319239	POD5	peroxidase	1.9328	11.9356	27.1745
novel.11874	POD6	peroxidase	0.100267	1.62437	5.01477
LOC114316921	POD7	peroxidase	172.384	842.529	641.591
LOC114294658	POD8	peroxidase	11.847	13.4109	25.5135
LOC114305112	POD9	peroxidase	20.501	90.9571	40.4941
LOC114274880	POD10	peroxidase	1120.31	374.529	241.39
LOC114257999	POD11	peroxidase	4.9935	2.19213	1.6672
LOC114256137	POD12	peroxidase	133.279	271.959	110.837
LOC114264567	POD13	peroxidase	1.5103	0.3043	1.7924
LOC114264885	POD14	peroxidase	0.0503	2.0518	3.5564
LOC114297627	POD15	peroxidase	6.21327	1.50707	0.1805
LOC114297632	POD16	peroxidase	2.06547	0.317567	0.0273
LOC114299094	POD17	peroxidase	7.89017	1.84377	0.227567
novel.12045	POD18	peroxidase	9.11657	1.3581	0.263633
LOC114308469	POD19	peroxidase	1.5545	0.595	0.470833
LOC114270444	POD20	peroxidase	20.51	9.2952	5.339
LOC114306857	POD21	peroxidase	1.24443	69.6192	30.1946
LOC114305604	POD22	peroxidase	22.671	14.1805	7.49547
LOC114305606	POD23	peroxidase	1.02807	0.117233	0.0275333
LOC114309672	POD24	peroxidase	62.0936	17.1496	2.83073
LOC114280051	POD25	peroxidase	1.99117	0.980867	0.638633
LOC114265898	CAD1	cinnamyl-alcohol dehydrogenase	7.3907	0.838033	0.307233
LOC114287901	CAD2	cinnamyl-alcohol dehydrogenase	3.32317	0	0
LOC114269906	CAD3	cinnamyl-alcohol dehydrogenase	4.48613	1.97687	1.4036
LOC114279237	CAD4	cinnamyl-alcohol dehydrogenase	0.774733	1.3358	1.0853
LOC114285665	CAD5	cinnamyl-alcohol dehydrogenase	2.24603	1.45363	0.6106
LOC114301144	CAD6	cinnamyl-alcohol dehydrogenase	1.42817	2.71943	2.36547
novel.10076	CAD7	cinnamyl-alcohol dehydrogenase	2.64103	0.4861	0.43
novel.3043	CAD8	cinnamyl-alcohol dehydrogenase	13.9799	7.1154	2.84797
novel.9939	CAD9	cinnamyl-alcohol dehydrogenase	6.04033	2.27463	1.9058
LOC114256449	CAD10	cinnamyl-alcohol dehydrogenase	3.92447	0.2845	0.0993
LOC114295845	CAD11	cinnamyl-alcohol dehydrogenase	17.0046	4.08127	5.7472
novel.12306	LOX1	linoleate 13S-lipoxygenase	3.2665	8.88867	6.29953
LOC114268608	LOX2	linoleate 13S-lipoxygenase	52.9072	15.5836	2.47593
LOC114297089	LOX3	linoleate 13S-lipoxygenase	31.5062	8.8902	1.53743
novel.6557	LOX4	linoleate 13S-lipoxygenase	58.0751	14.8377	2.88893
LOC114306071	LOX5	linoleate 13S-lipoxygenase	14.0538	4.78923	5.16083
LOC114258046	LOX6	linoleate 13S-lipoxygenase	25.8699	4.64263	3.42897
LOC114287060	LOX7	linoleate 9S-lipoxygenase	11.7872	1.50767	0.979567
LOC114259967	LOX8	linoleate 9S-lipoxygenase	36.7058	145.828	320.1
LOC114258339	LOX9	linoleate 9S-lipoxygenase	45.2159	4.46623	2.7875
LOC114291250	MCL1	malonyl-CoA/methylmalonyl-CoA synthetase	116.003	28.8132	12.8448
LOC114316460	MCL2	malonyl-CoA/methylmalonyl-CoA synthetase	37.7794	11.8191	9.01987
LOC114306527	accC	acetyl-CoA carboxylase	57.7066	17.4674	20.8965
LOC114292046	FATB1	fatty acyl-ACP thioesterase B	105.019	286.265	225.168
LOC114264135	FATB2	fatty acyl-ACP thioesterase B	28.3491	84.5922	57.1501
novel.5825	FATB3	fatty acyl-ACP thioesterase B	32.8189	92.7792	77.1402
novel.5826	FATB4	fatty acyl-ACP thioesterase B	42.4235	182.994	138.196
LOC114287203	fabF1	3-oxoacyl-[acyl-carrier-protein] synthase	93.4657	5.64427	0.2409
LOC114300910	fabF2	3-oxoacyl-[acyl-carrier-protein] synthase	80.783	4.06303	2.2421
LOC114285574	MECR	mitochondrial-enoyl-[acyl-carrier-protein] reductase	4.72803	1.94783	1.23793
LOC114287091	SAD	stearoyl-[acyl-carrier-protein] 9-desaturase	37.8981	18.3529	11.4195
LOC114283191	fabA1	3-hydroxyacyl-[acyl-carrier-protein] dehydratase	81.9174	22.1249	16.0364
novel.7482	fabA2	3-hydroxyacyl-[acyl-carrier-protein] dehydratase	24.5402	8.2477	5.5247
LOC114258619	accB1	acetyl-CoA carboxylase biotin carboxyl carrier protein	42.4796	42.6554	17.8325
LOC114293660	accB2	acetyl-CoA carboxylase biotin carboxyl carrier protein	38.4325	16.2836	12.1609
LOC114282933	ACSL1	K01897 long-chain acyl-CoA synthetase [EC:6.2.1.3] | (RefSeq) probable acyl-activating enzyme 16, chloroplastic isoform X1 (A)	7.71223	4.79233	2.8648
LOC114307730	ACSL2	K01897 long-chain acyl-CoA synthetase [EC:6.2.1.3] | (RefSeq) long chain acyl-CoA synthetase 6, peroxisomal-like isoform X1 (A)	1.05167	12.6953	16.6856
LOC114261132	ACSL3	K01897 long-chain acyl-CoA synthetase [EC:6.2.1.3] | (RefSeq) long chain acyl-CoA synthetase 1-like isoform X1 (A)	64.952	8.21613	1.16573
LOC114261783	fabD	[acyl-carrier-protein] S-malonyltransferase	43.2212	18.8903	10.1959
LOC114282302	fabI	enoyl-[acyl-carrier protein] reductase	134.712	712.853	573.943
LOC114294360	fabG1	3-oxoacyl-[acyl-carrier protein] reductase	17.743	8.13323	4.55893
LOC114311440	fabG2	3-oxoacyl-[acyl-carrier protein] reductase	65.9263	27.4914	19.937
LOC114311504	fabG3	3-oxoacyl-[acyl-carrier protein] reductase	9.97153	4.0813	3.62903
LOC114309712	fabG4	3-oxoacyl-[acyl-carrier protein] reductase	13.8584	4.46157	3.6585
